# Supplementary material for: Photoinitiated thiol–ene mediated functionalisation of 4,5-enoses
Source: Royal Society of Chemistry journal article supplement (doi:10.1039/d5ob00507h), 2025-01-01
Supplement: d5ob00507h1.pdf [file d5ob00507h1.pdf]

## Supporting Information (SI)

### Photoinitiated Thiol-ene Mediated Functionalization of 4,5-Enoses

Alejandro Prieto-Castañeda,<sup>a,c</sup> Harlei Martin,<sup>a</sup> Tapasi Manna,<sup>b</sup> Laura Beswick,<sup>b</sup> Joshua T. McLean,<sup>a</sup> Imlirenla Pongener,<sup>b</sup> Inés Rabadán González,<sup>a</sup> Brendan Twamley,<sup>a</sup> Gavin J. Miller,<sup>b\*</sup> Eoin M. Scanlan<sup>a\*</sup>

<sup>a</sup> School of Chemistry & Trinity Biomedical Sciences Institute (TBSI), Trinity College Dublin, 152-160 Pearse Street, Dublin, D02 R590, Ireland.

<sup>b</sup> School of Chemical and Physical Sciences & Centre for Glycoscience, Keele University, Keele, Staffordshire, ST5 5BG, UK.

<sup>c</sup> Chemical and Environmental Technology Department, ESCET, Universidad Rey Juan Carlos, 28933, Móstoles, Spain.

\* E-mail: eoin.scanlan@tcd.ie; g.j.miller@keele.ac.uk

## Supporting Information II

*NMR spectra and X-ray crystallographic data*

### Table of contents

#### <sup>1</sup>H NMR and <sup>13</sup>C{<sup>1</sup>H} NMR spectra

|                                               |            |
|-----------------------------------------------|------------|
| <b>1. Thiol-ene reactions on 1,2-glycols</b>  | <b>S3</b>  |
| Compound S3a                                  | S3         |
| Compound S3b                                  | S4         |
| Compound S3c                                  | S5         |
| Compound S4a                                  | S6         |
| Compound S4b                                  | S7         |
| Compound S5a                                  | S8         |
| Compound S5b                                  | S9         |
| <b>2. Synthesis of 4,5-glycol 1</b>           | <b>S10</b> |
| Compound 1                                    | S10        |
| <b>3. Thiol-ene reactions on 4,5-glycol 1</b> | <b>S11</b> |
| Compound 5a                                   | S11        |
| Compound 6a                                   | S13        |
| Compound 6a'                                  | S15        |
| Compound 5b                                   | S16        |
| Compound 6b                                   | S17        |
| Compound 5c                                   | S18        |
| Compound 6c                                   | S19        |
| Compound 5d                                   | S20        |

|                                                               |            |
|---------------------------------------------------------------|------------|
| Compound <b>6d</b>                                            | S21        |
| Compound <b>5e</b>                                            | S22        |
| Compound <b>6e</b>                                            | S23        |
| Compound <b>5f</b>                                            | S24        |
| Compound <b>6f</b>                                            | S25        |
| Compound <b>5g</b>                                            | S26        |
| Compound <b>6g</b>                                            | S27        |
| Compound <b>6h</b>                                            | S28        |
| <b>4. Synthesis of 4,5-glycals 7-10</b>                       | <b>S29</b> |
| <i>4.1. Synthesis of 7</i>                                    | S29        |
| Compound <b>12<math>\alpha</math></b>                         | S29        |
| Compound <b>7</b>                                             | S30        |
| <i>4.2. Synthesis of 8</i>                                    | S31        |
| Compound <b>12<math>\beta</math></b>                          | S31        |
| Compound <b>13</b>                                            | S32        |
| Compound <b>8</b>                                             | S33        |
| <i>4.3. Synthesis of 9</i>                                    | S34        |
| Compound <b>9</b>                                             | S34        |
| <i>4.4. Synthesis of 10</i>                                   | S35        |
| Compound <b>17</b>                                            | S35        |
| Compound <b>10</b>                                            | S36        |
| <b>5. Thiol-ene reactions on 4,5-glycals 7-10</b>             | <b>S37</b> |
| Compound <b>18</b>                                            | S37        |
| Compound <b>19</b>                                            | S38        |
| Compound <b>20a</b>                                           | S39        |
| Compound <b>20b</b>                                           | S40        |
| Compound <b>21</b>                                            | S41        |
| <b>6. Synthesis of disaccharide 22 and thiol-ene reaction</b> | <b>S42</b> |
| <i>6.1. Synthesis of disaccharide 22</i>                      | S42        |
| Compound <b>24</b>                                            | S42        |
| Compound <b>25</b>                                            | S46        |
| Compound <b>22</b>                                            | S50        |
| <i>6.2. Thiol-ene reaction on disaccharide 22</i>             | S54        |
| Compound <b>26</b>                                            | S54        |
| <b>7. X-ray crystal structure data</b>                        | <b>S58</b> |

# 1. Thiol-ene reactions on 1,2-glycols

$^1\text{H}$  NMR (400 MHz,  $\text{CDCl}_3$ ) and  $^{13}\text{C}\{^1\text{H}\}$  NMR (101 MHz,  $\text{CDCl}_3$ ) spectra of **S3a**

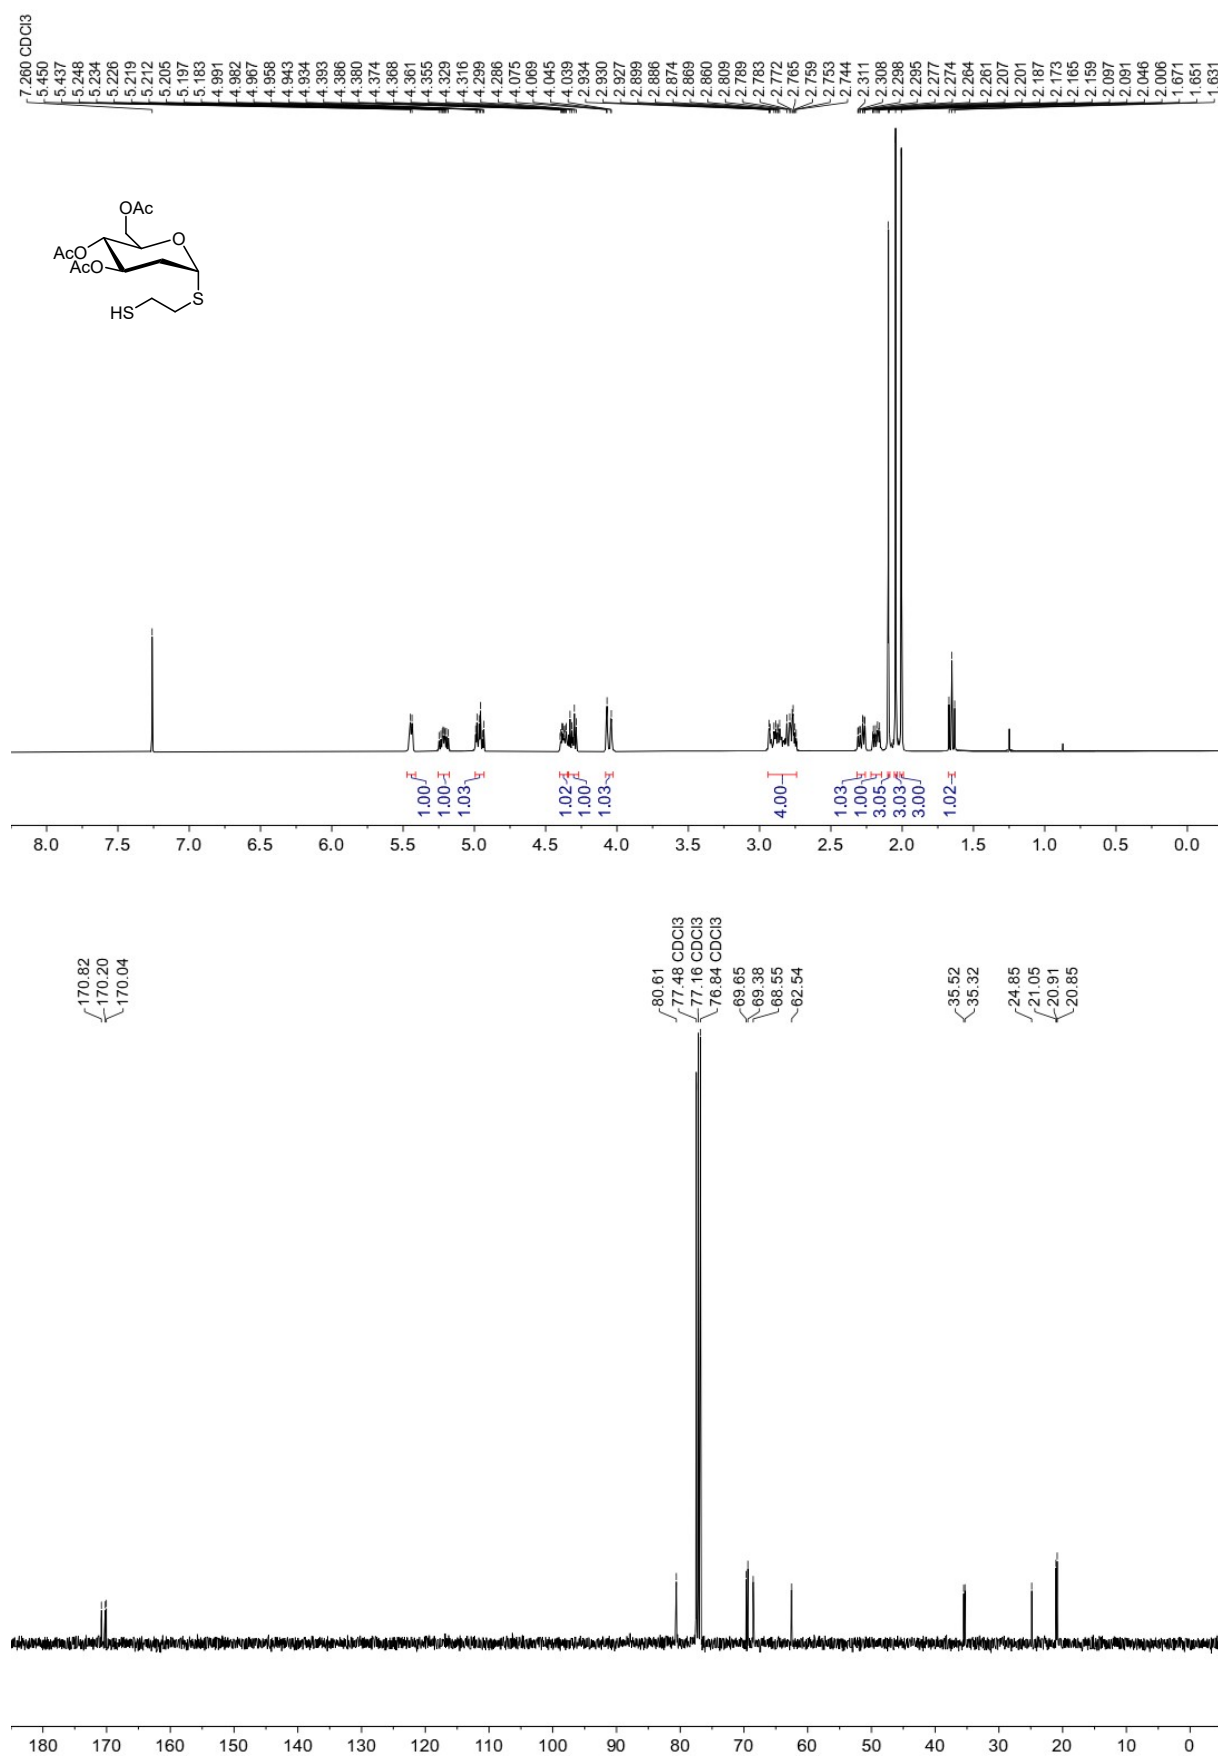

$^1\text{H}$  NMR (400 MHz,  $\text{CDCl}_3$ ) and  $^{13}\text{C}\{^1\text{H}\}$  NMR (101 MHz,  $\text{CDCl}_3$ ) spectra of **S3b**

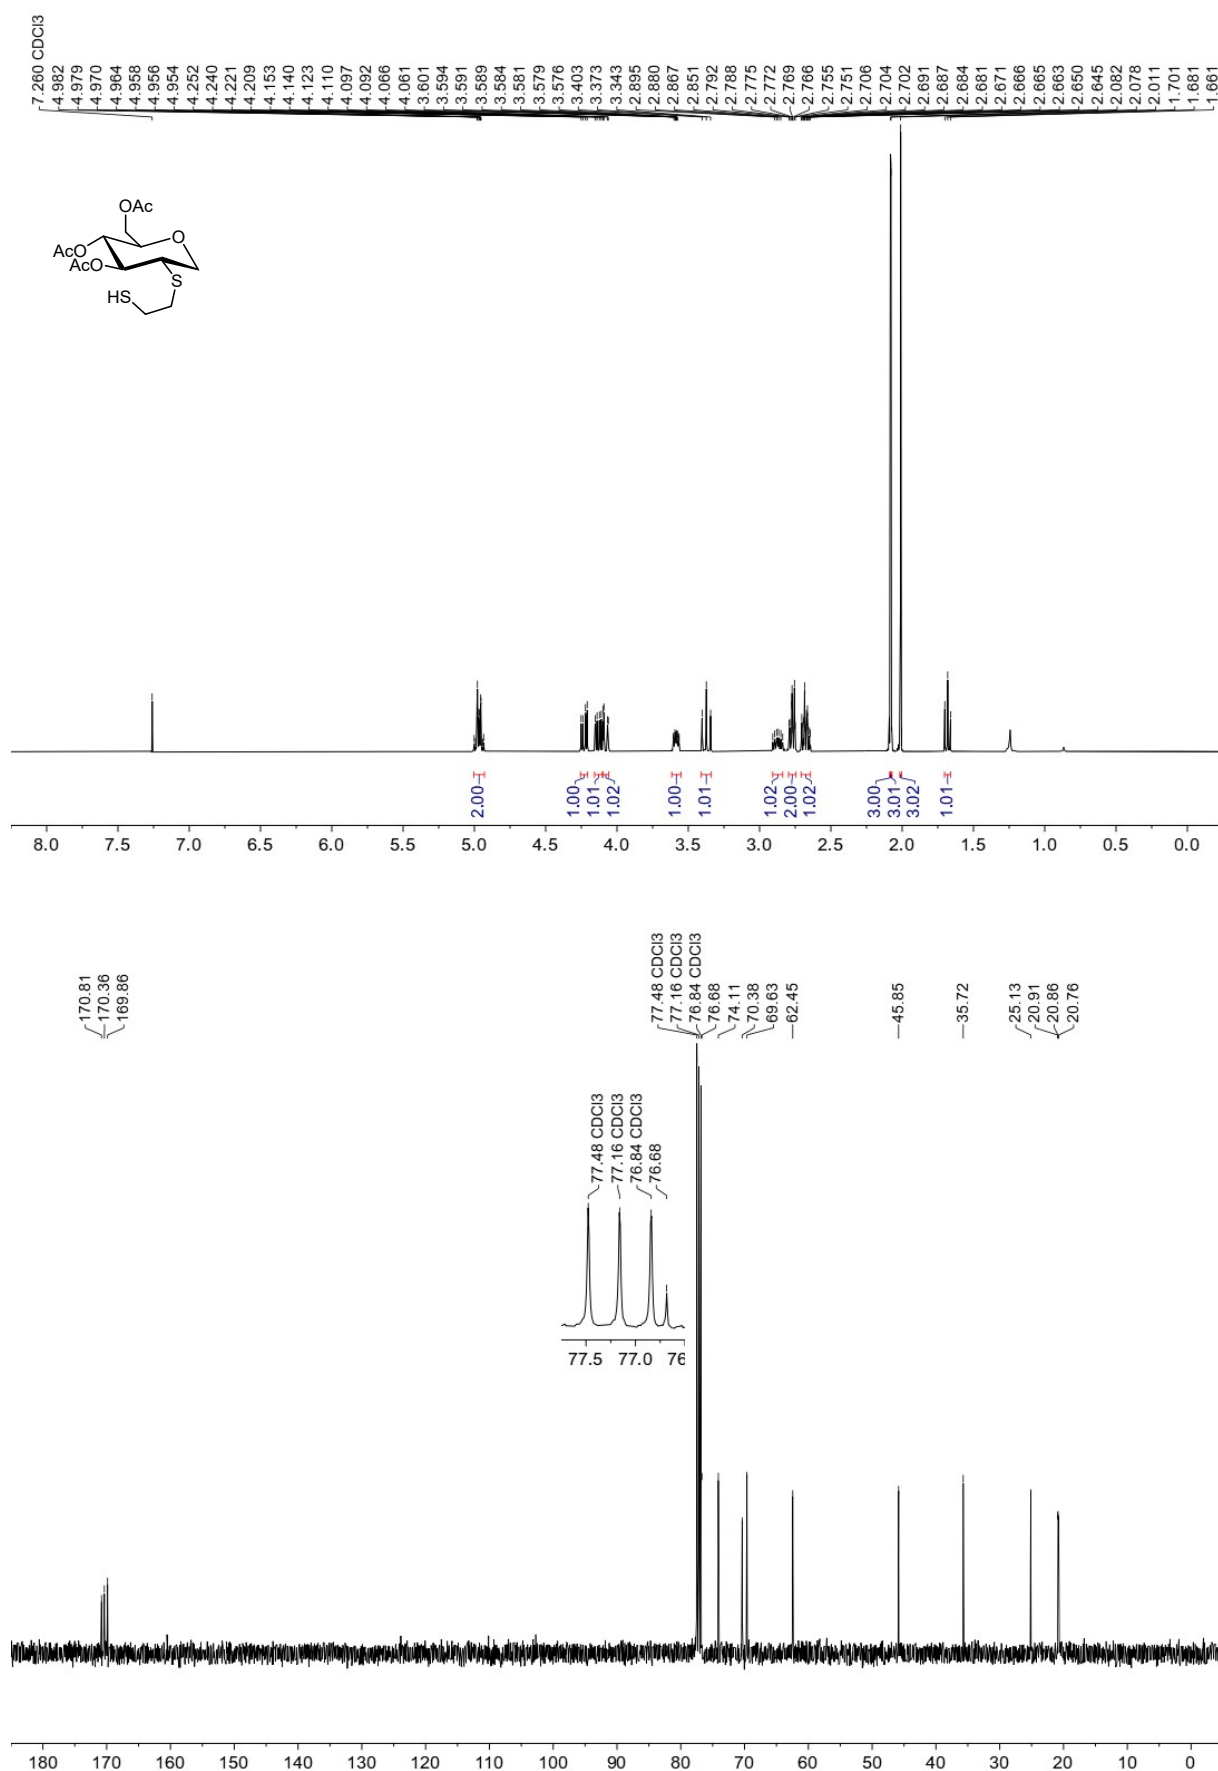

$^1\text{H}$  NMR (400 MHz,  $\text{CDCl}_3$ ) and  $^{13}\text{C}\{^1\text{H}\}$  NMR (101 MHz,  $\text{CDCl}_3$ ) spectra of **S3c**

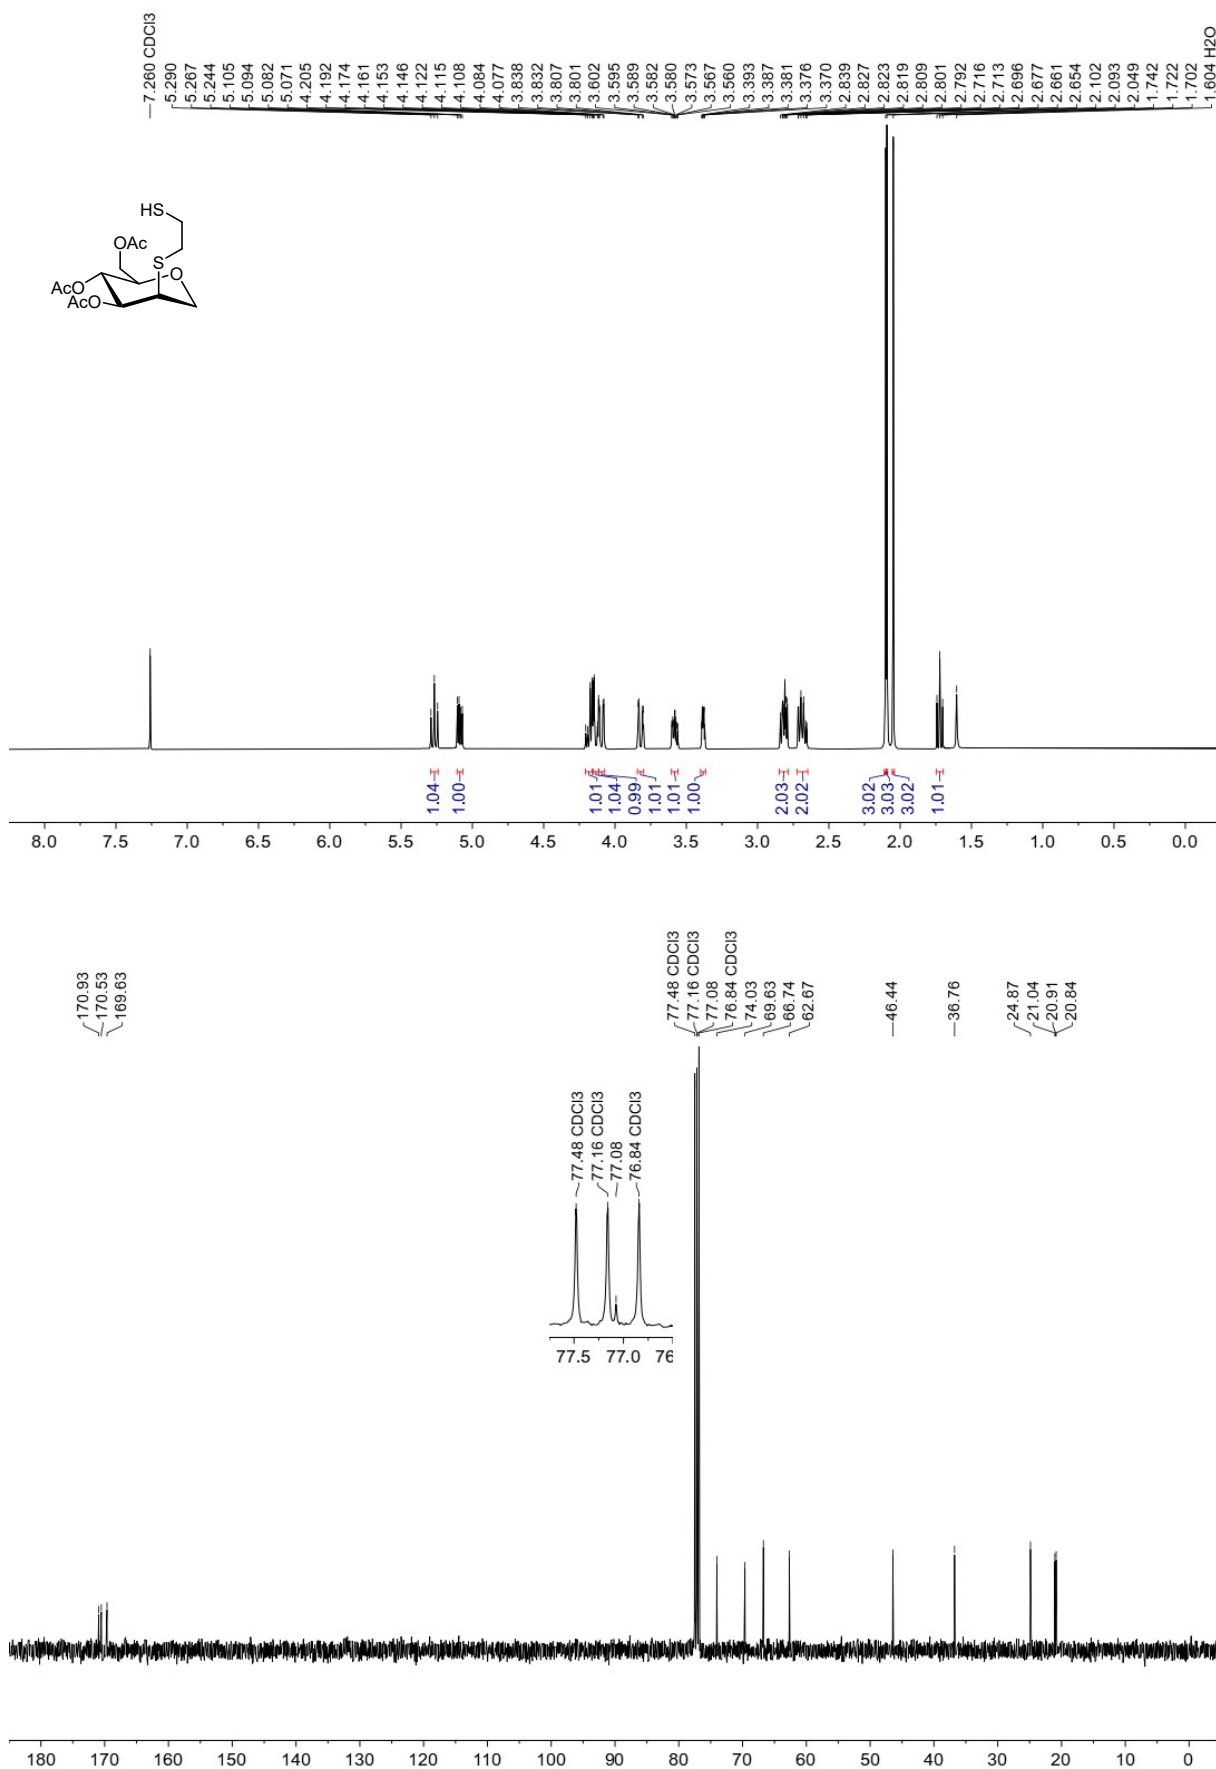

$^1\text{H}$  NMR (400 MHz,  $\text{CDCl}_3$ ) and  $^{13}\text{C}\{^1\text{H}\}$  NMR (101 MHz,  $\text{CDCl}_3$ ) spectra of **S4a**

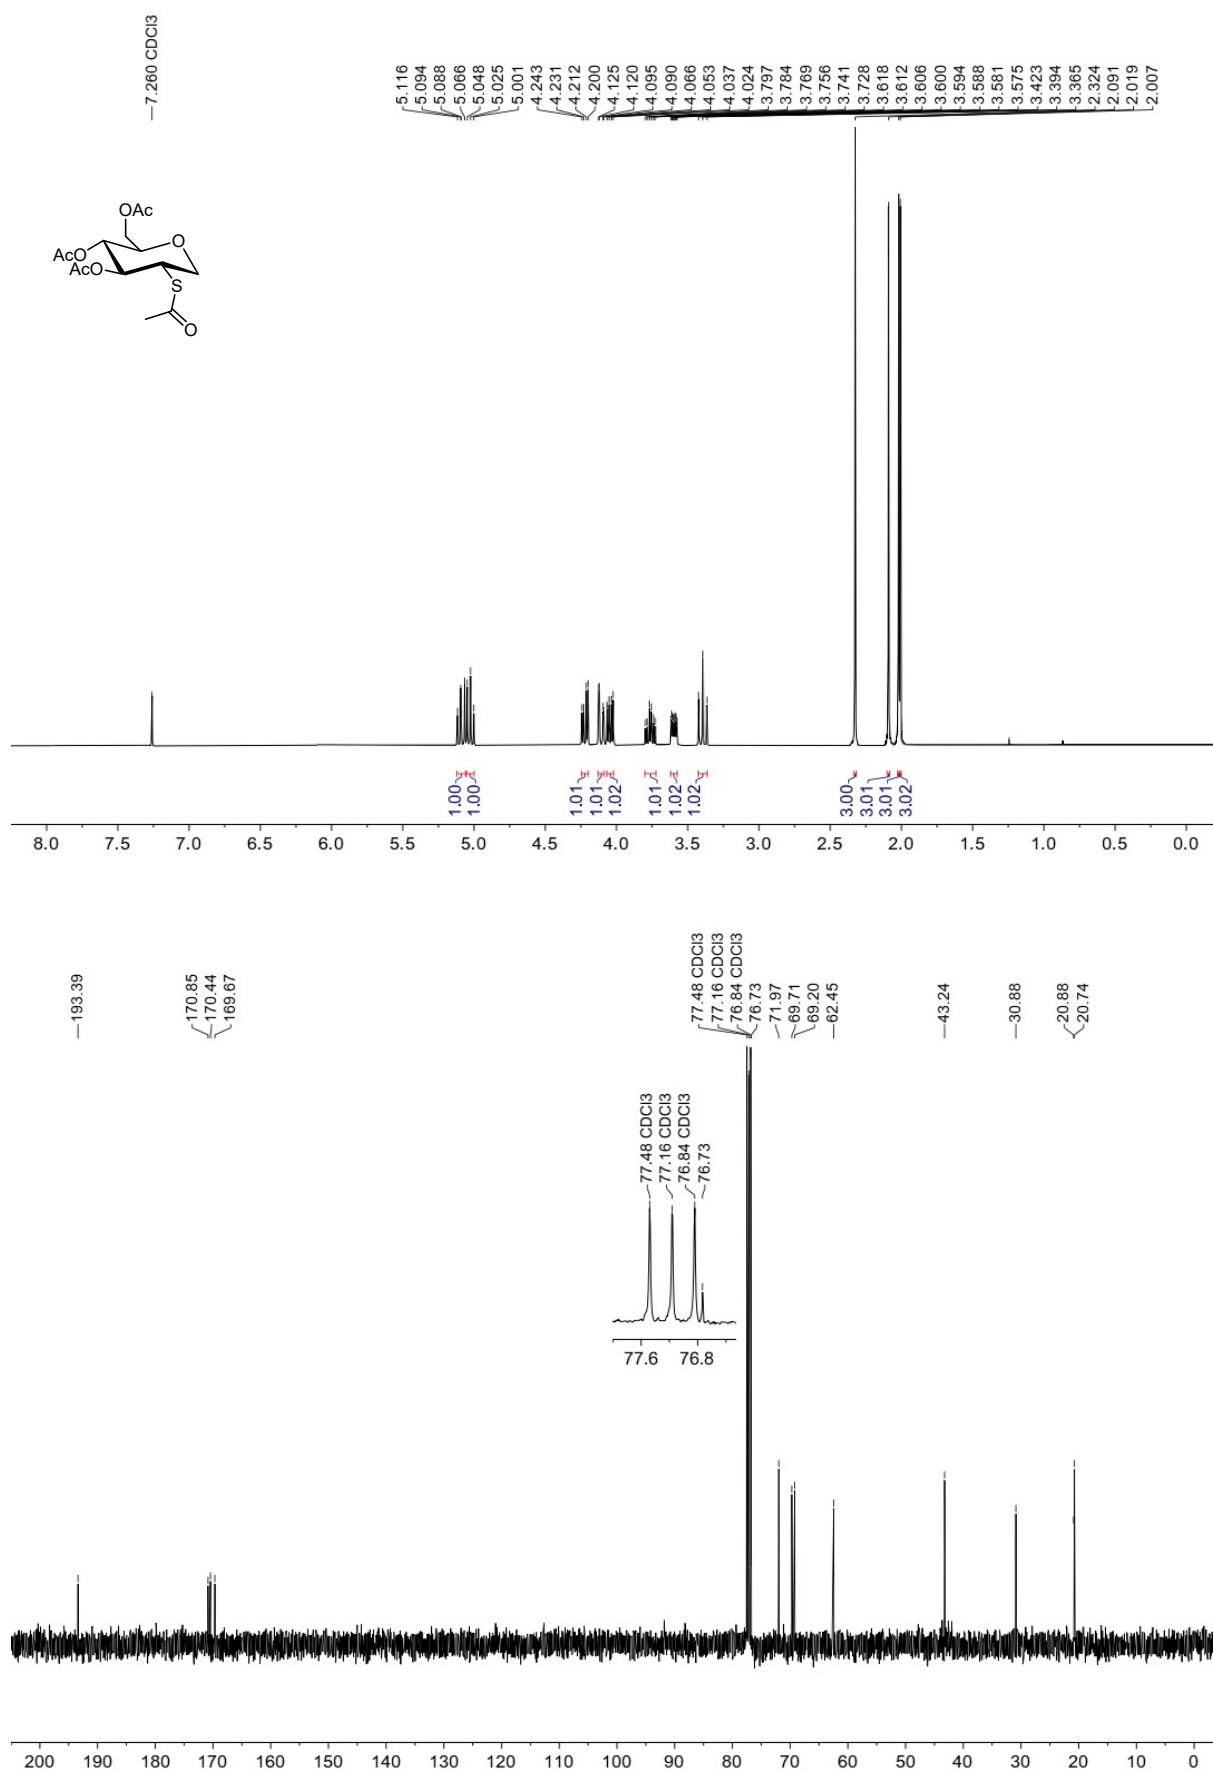

$^1\text{H}$  NMR (400 MHz,  $\text{CDCl}_3$ ) and  $^{13}\text{C}\{^1\text{H}\}$  NMR (101 MHz,  $\text{CDCl}_3$ ) spectra of **S4b**

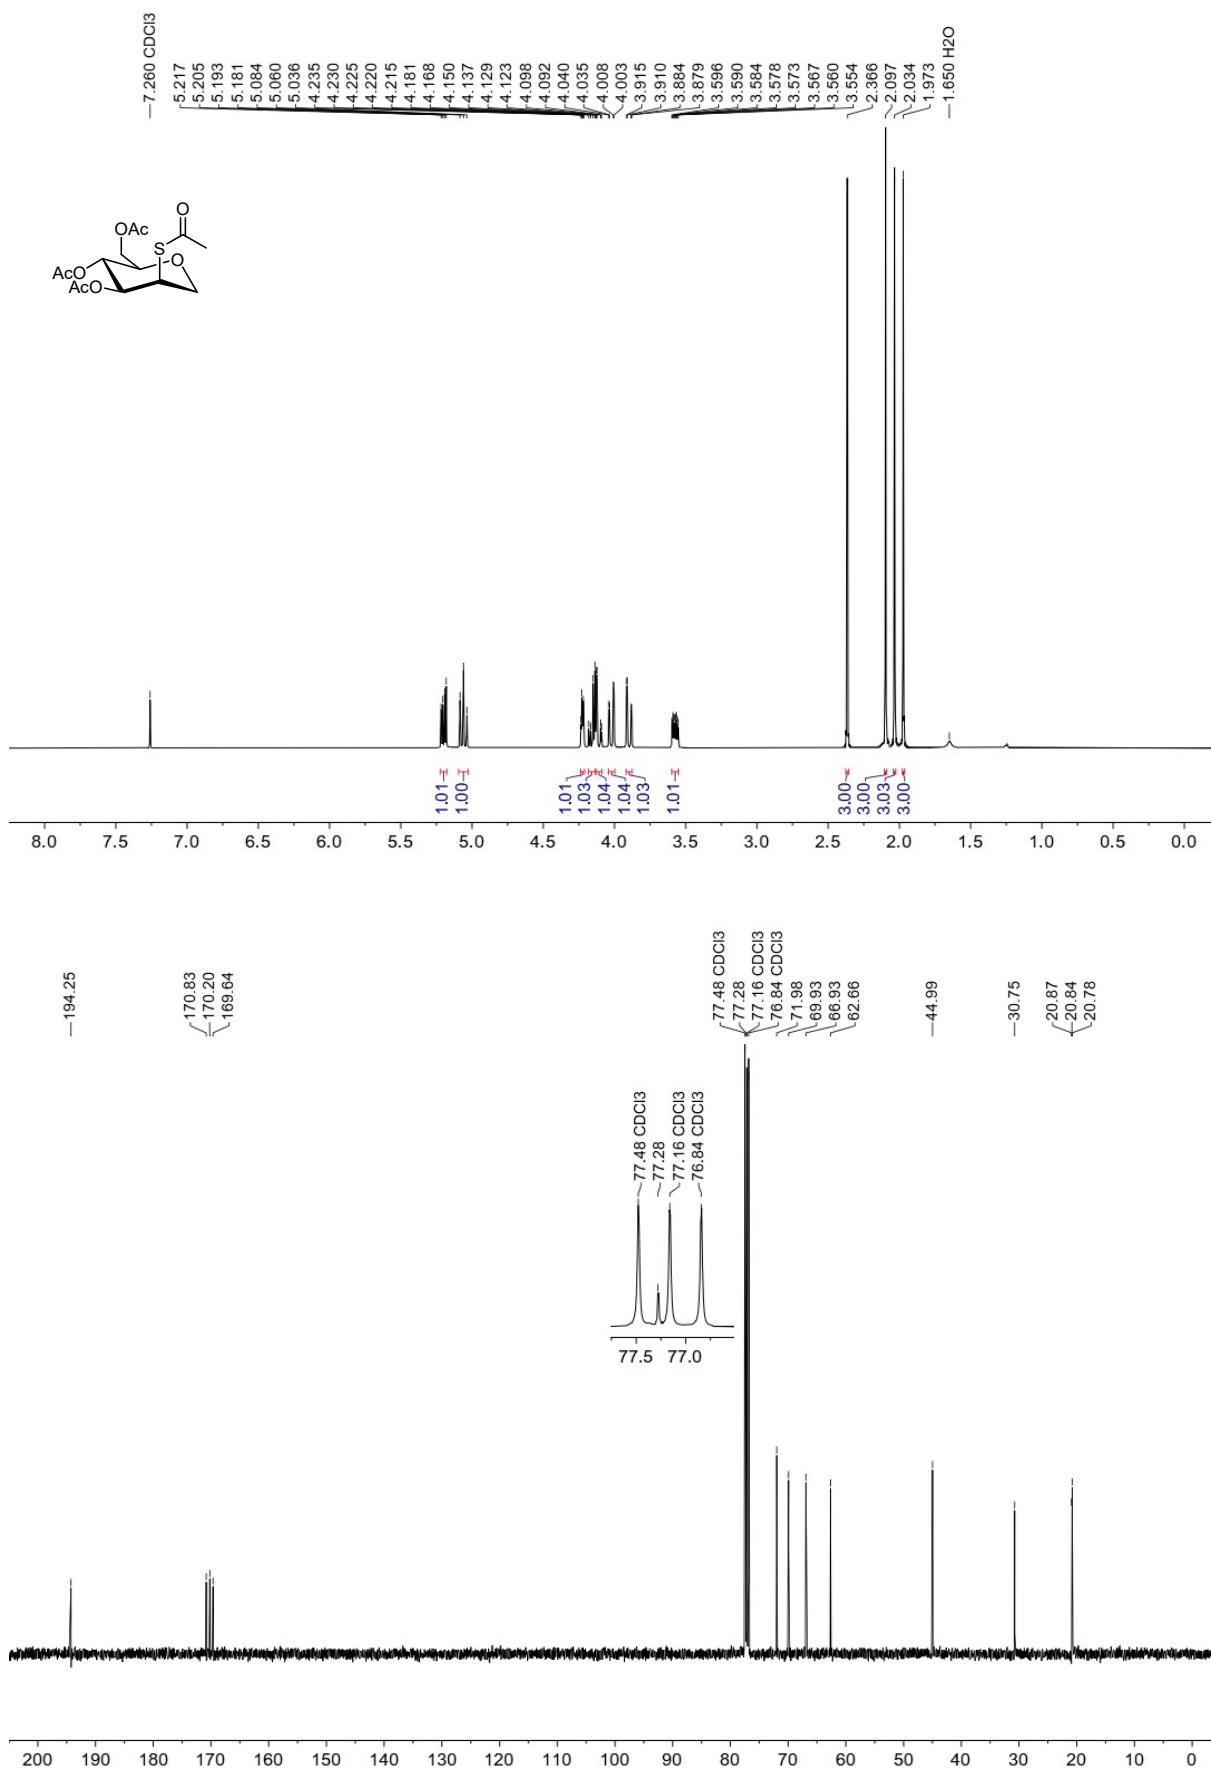

$^1\text{H}$  NMR (400 MHz,  $\text{CDCl}_3$ ) and  $^{13}\text{C}\{^1\text{H}\}$  NMR (101 MHz,  $\text{CDCl}_3$ ) spectra of **S5a**

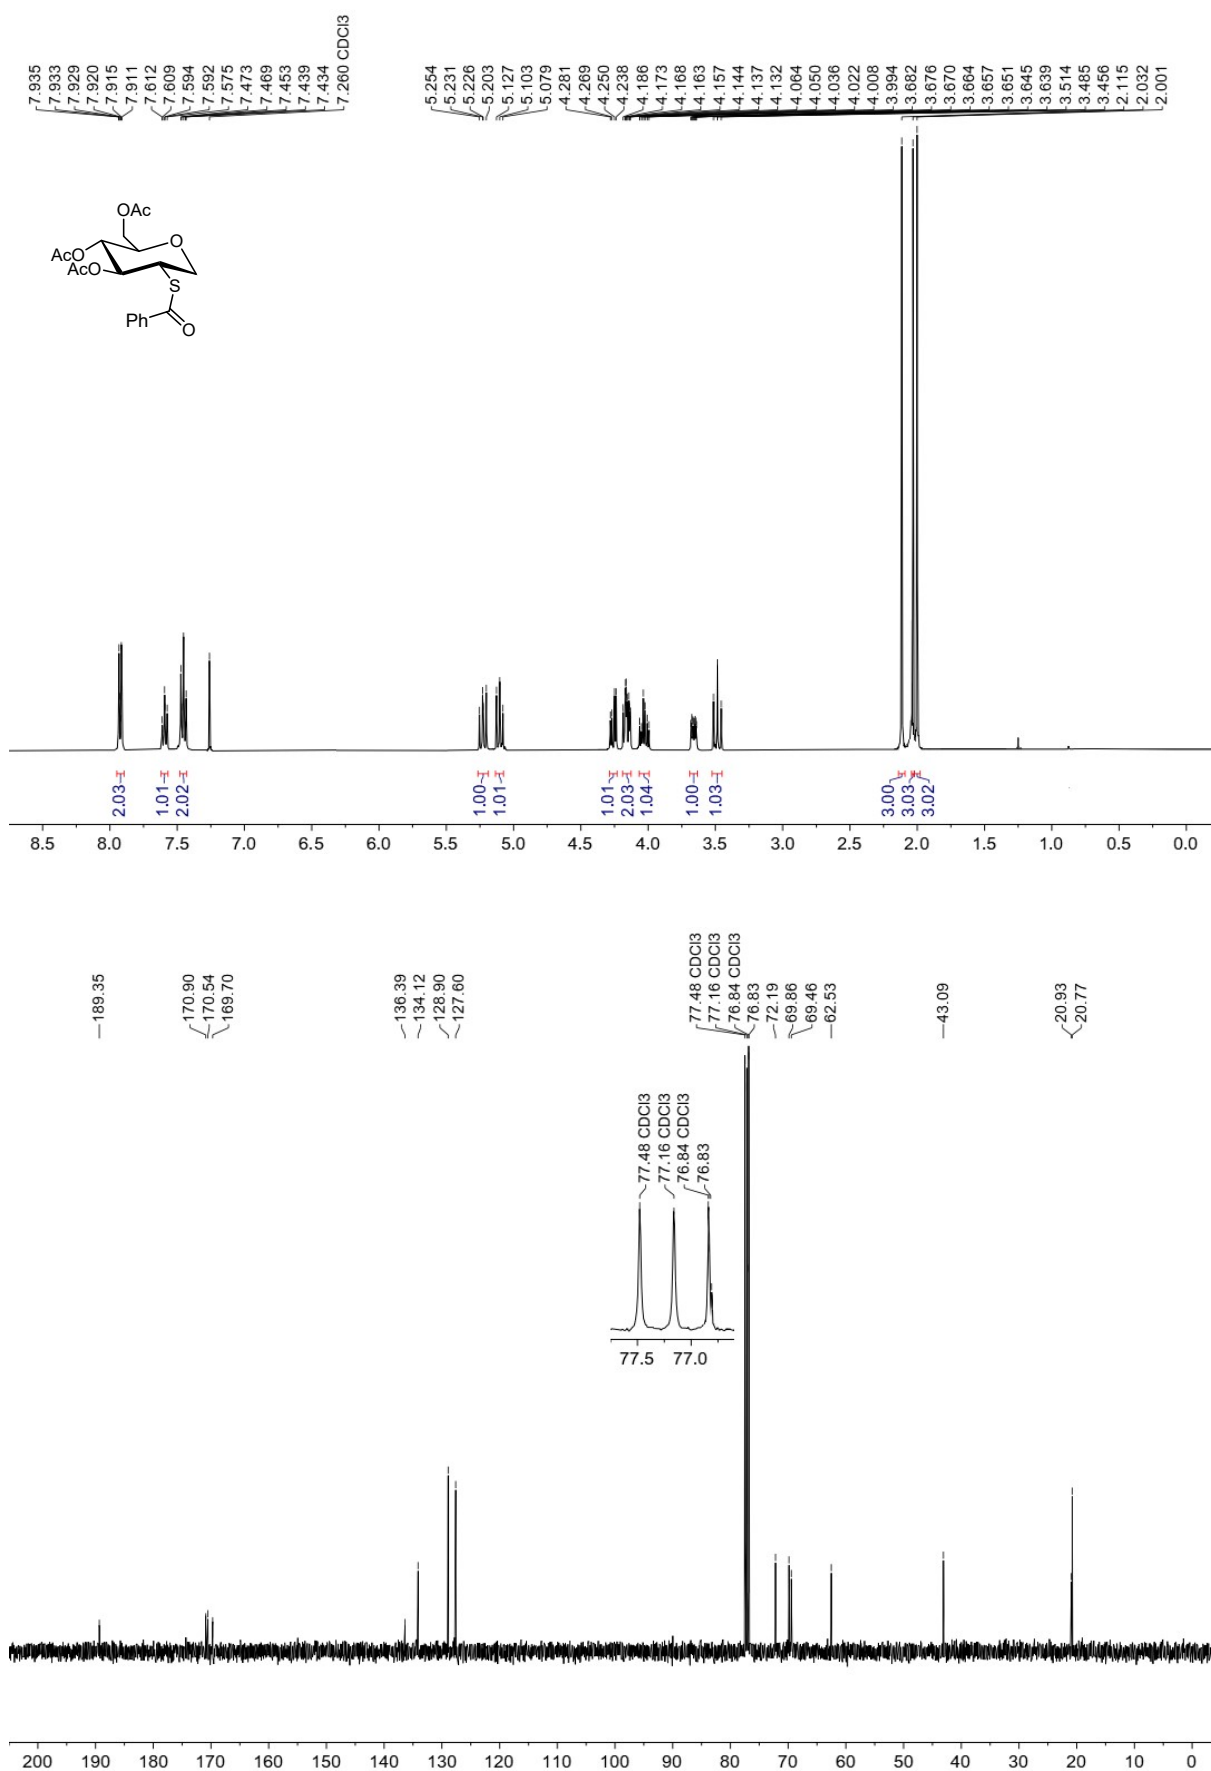



$^1\text{H}$  NMR (400 MHz,  $\text{CDCl}_3$ ) and  $^{13}\text{C}\{^1\text{H}\}$  NMR (101 MHz,  $\text{CDCl}_3$ ) spectra of **S5b**

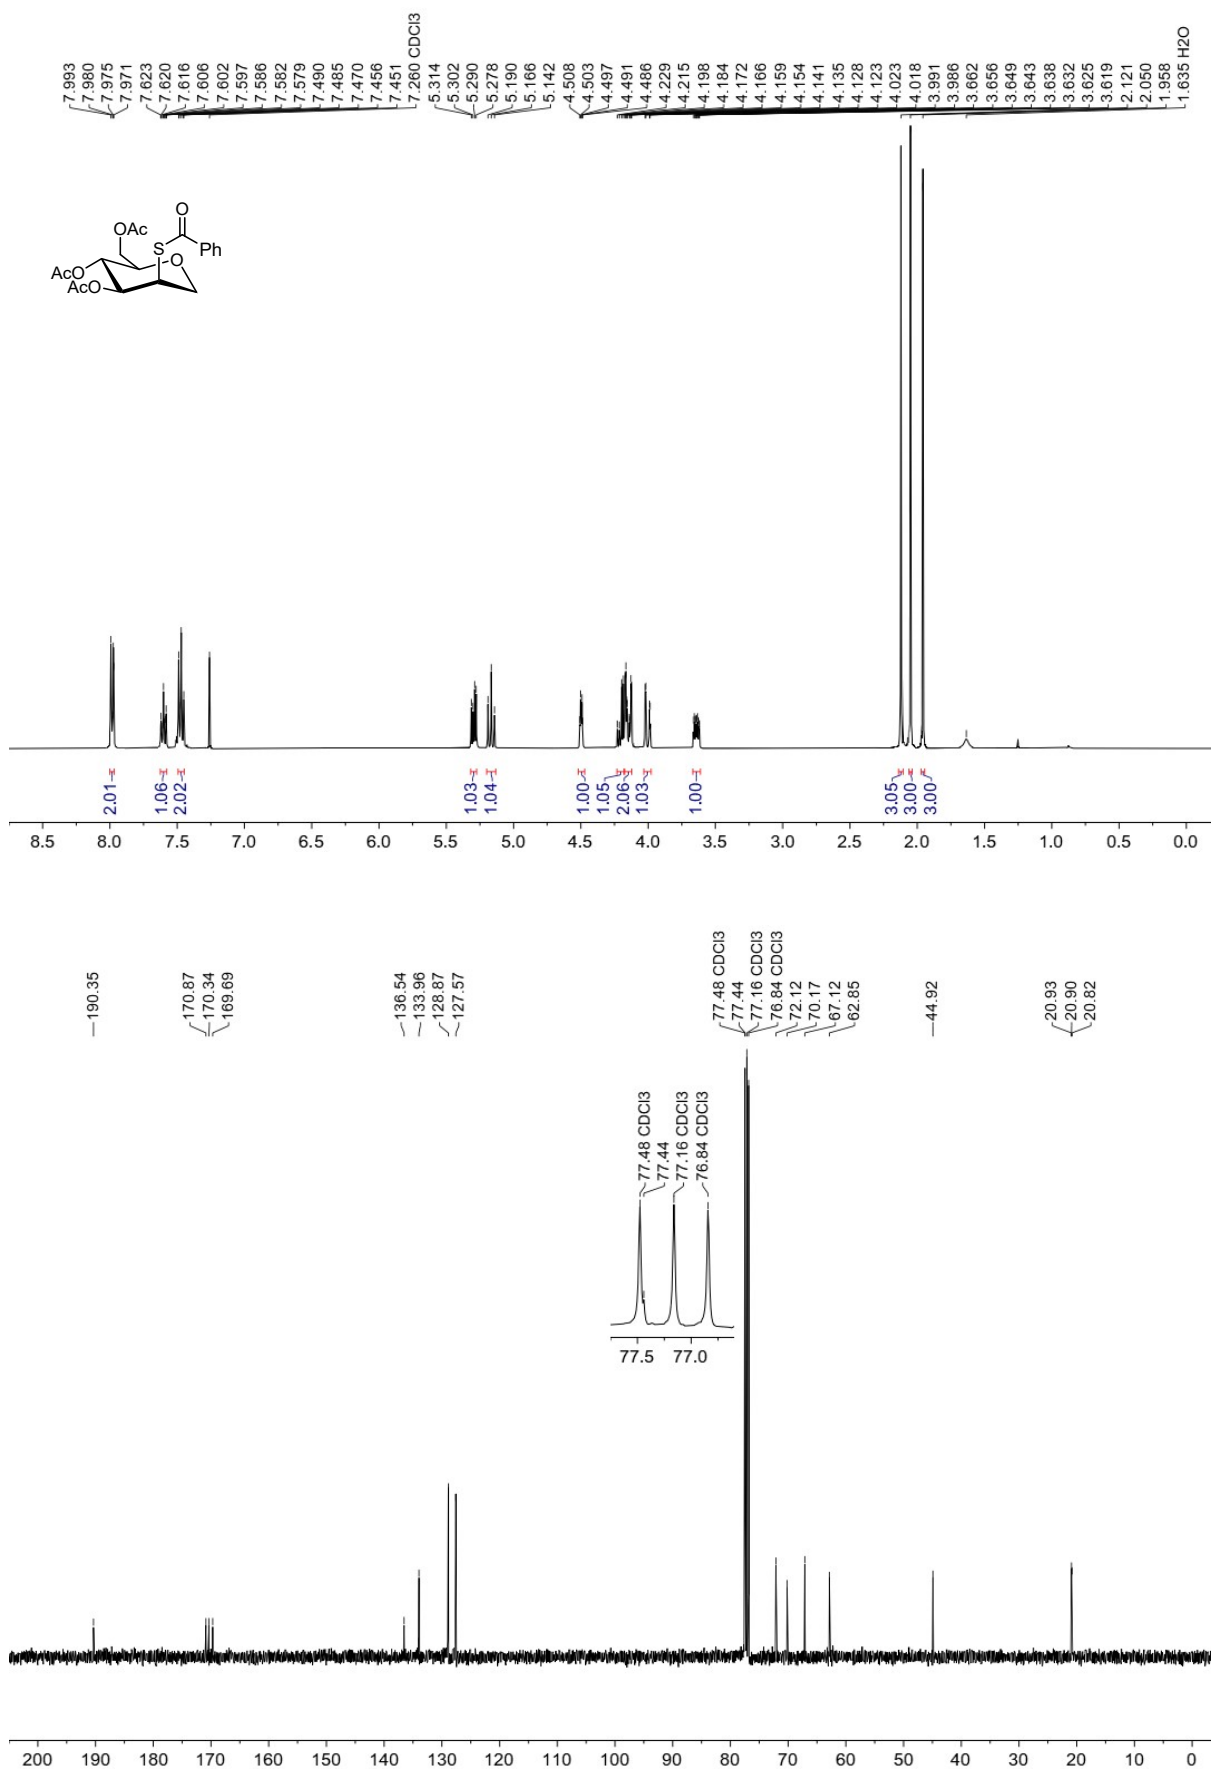

## 2. Synthesis of 4,5-glycal 1

$^1\text{H}$  NMR (400 MHz,  $\text{CDCl}_3$ ) and  $^{13}\text{C}\{^1\text{H}\}$  NMR (101 MHz,  $\text{CDCl}_3$ ) spectra of **1**

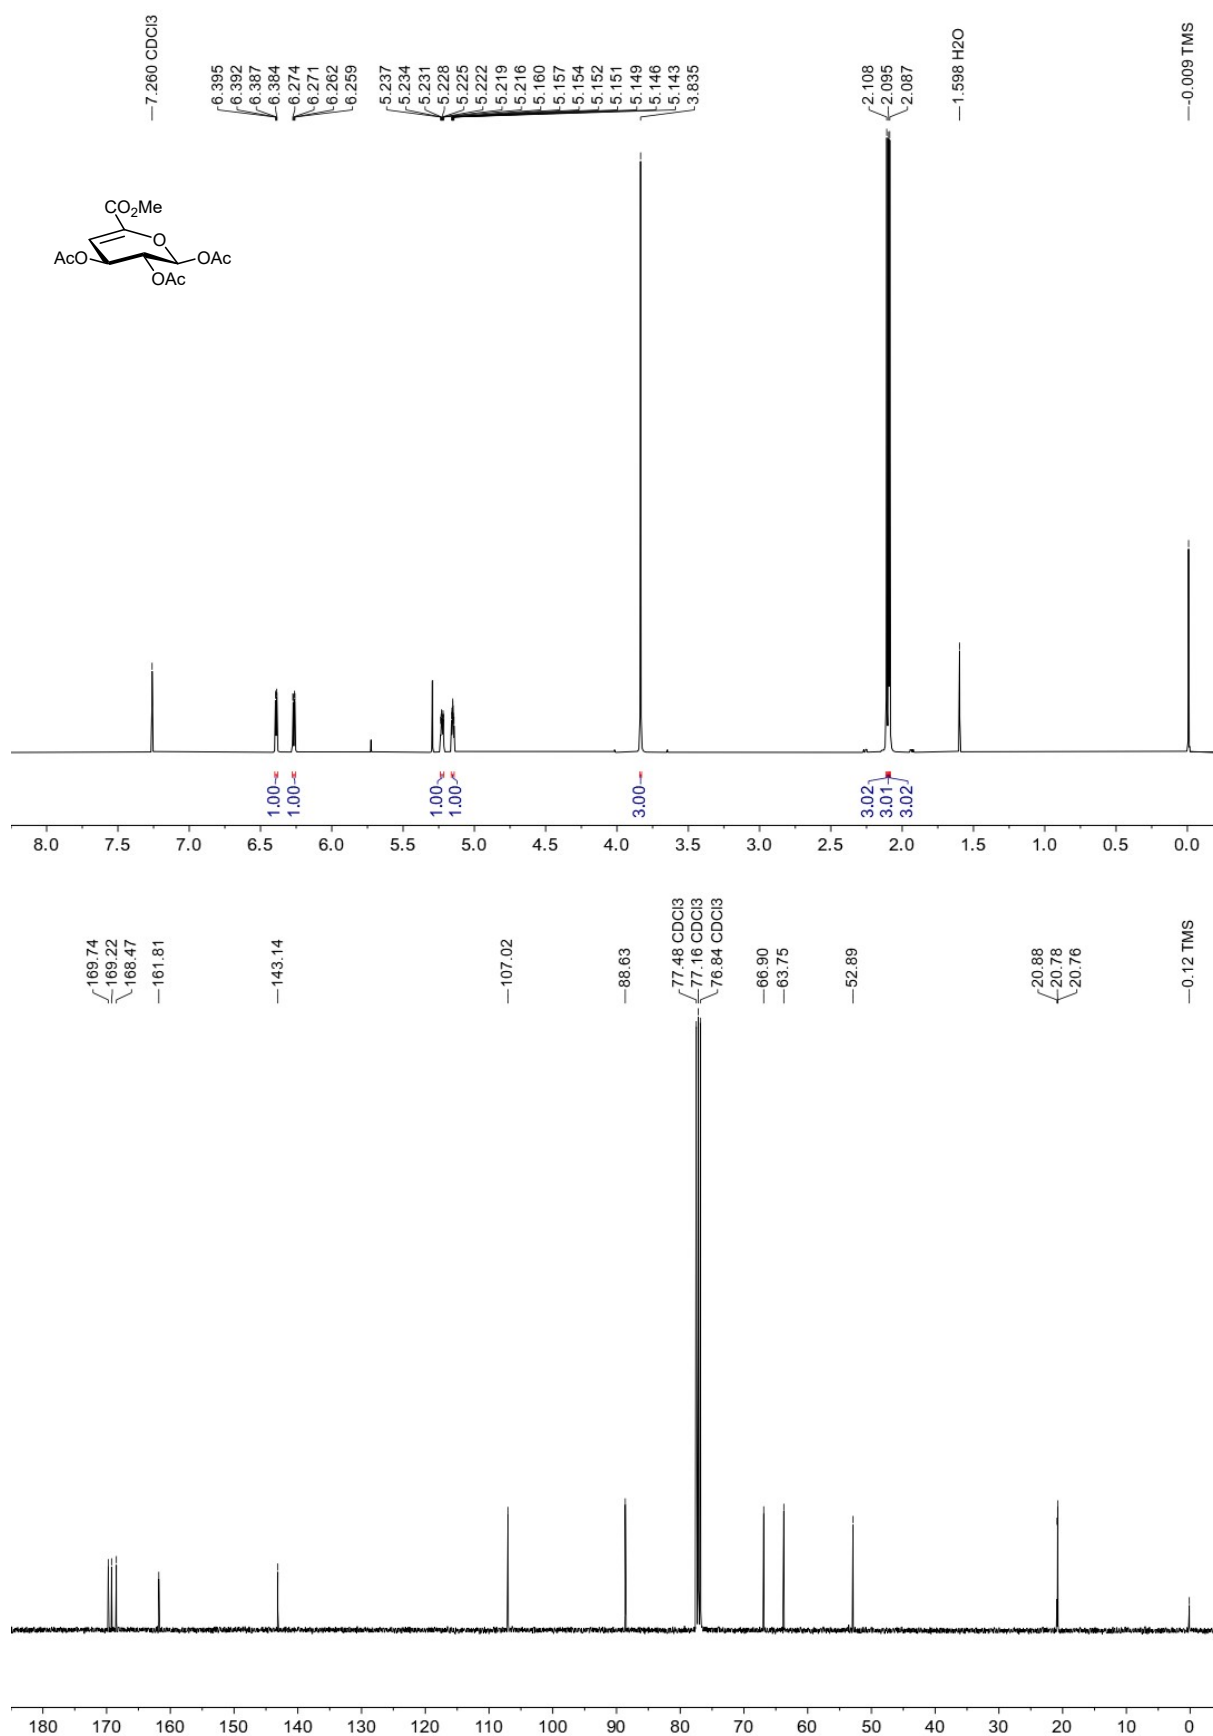

### 3. Thiol-ene reactions on 4,5-glycal 1

$^1\text{H}$  NMR (400 MHz,  $\text{CDCl}_3$ ) and  $^{13}\text{C}\{^1\text{H}\}$  NMR (101 MHz,  $\text{CDCl}_3$ ) spectra of **5a**

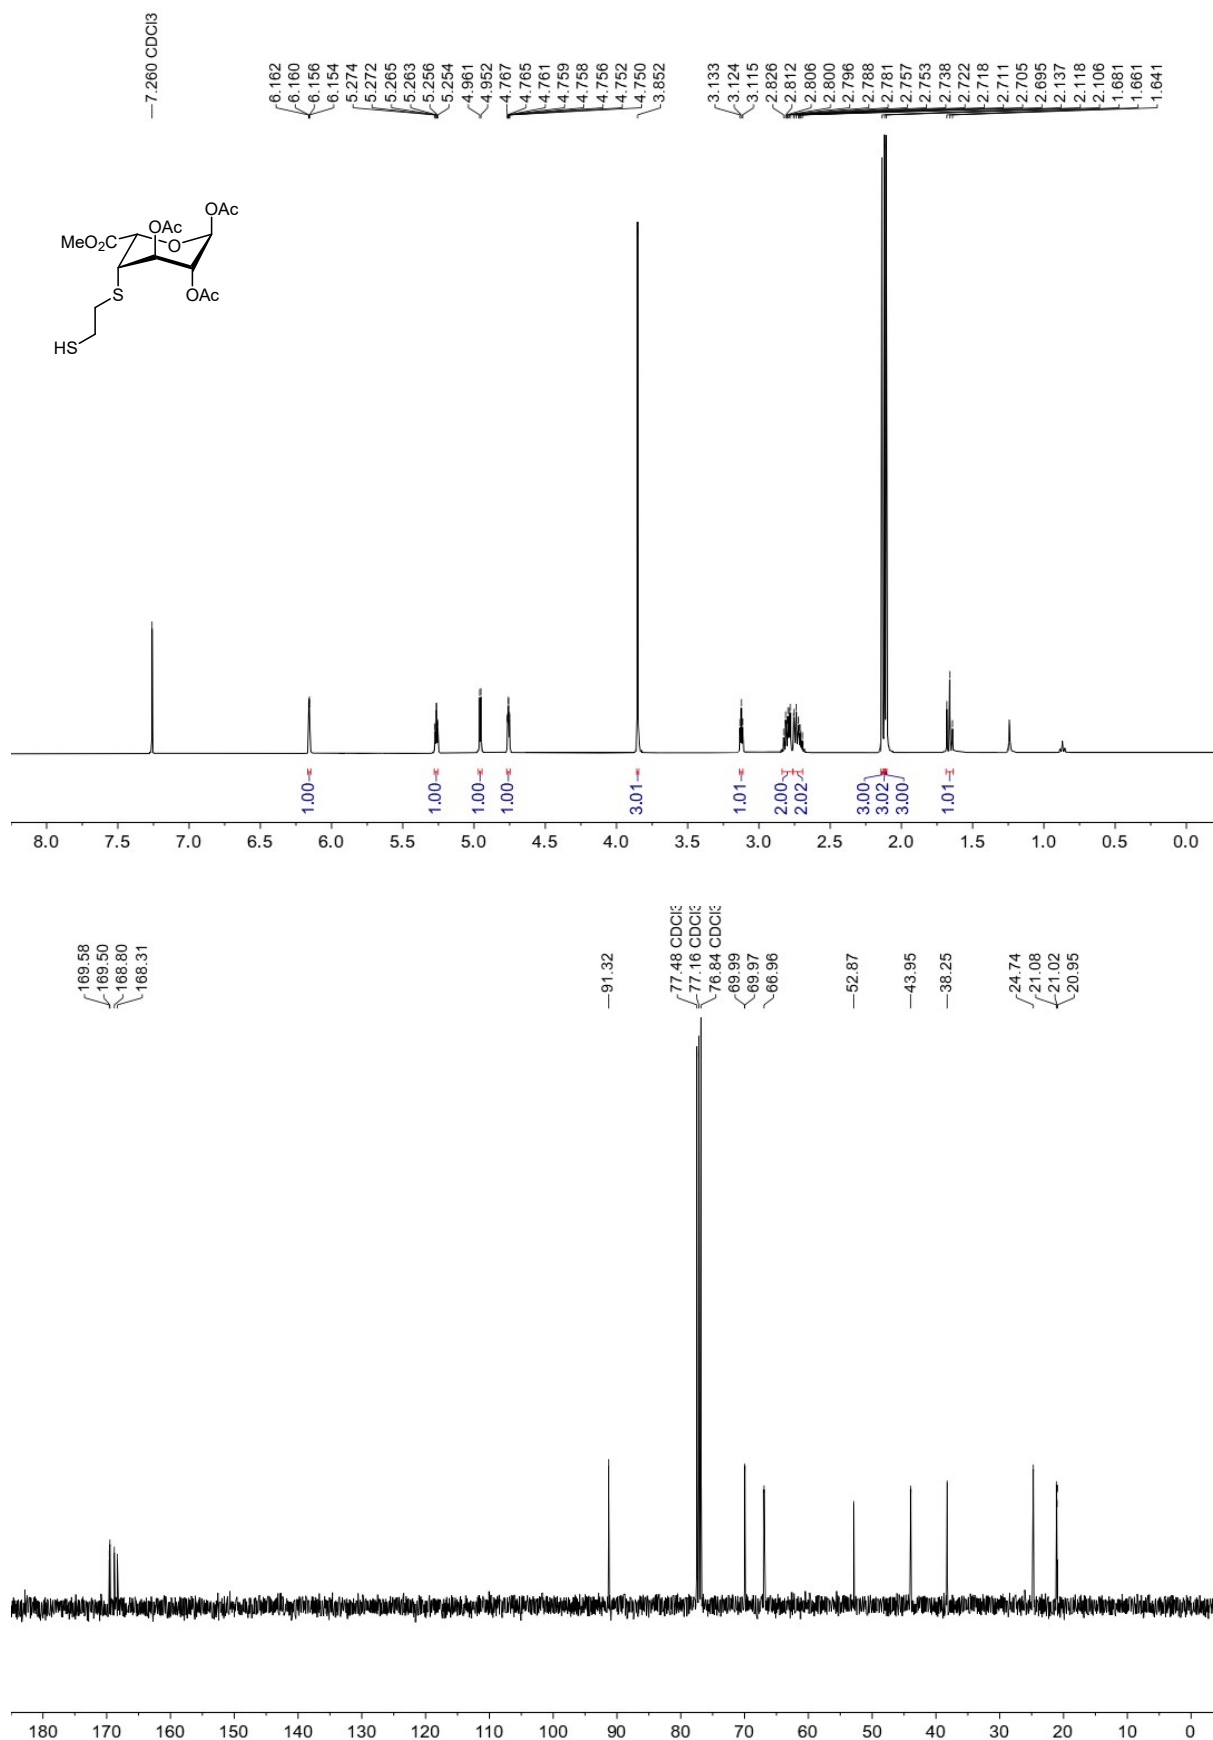

2D  $^1\text{H}$ ,  $^1\text{H}$ -NOESY (400 MHz,  $\text{CDCl}_3$ ) spectra of **5a**

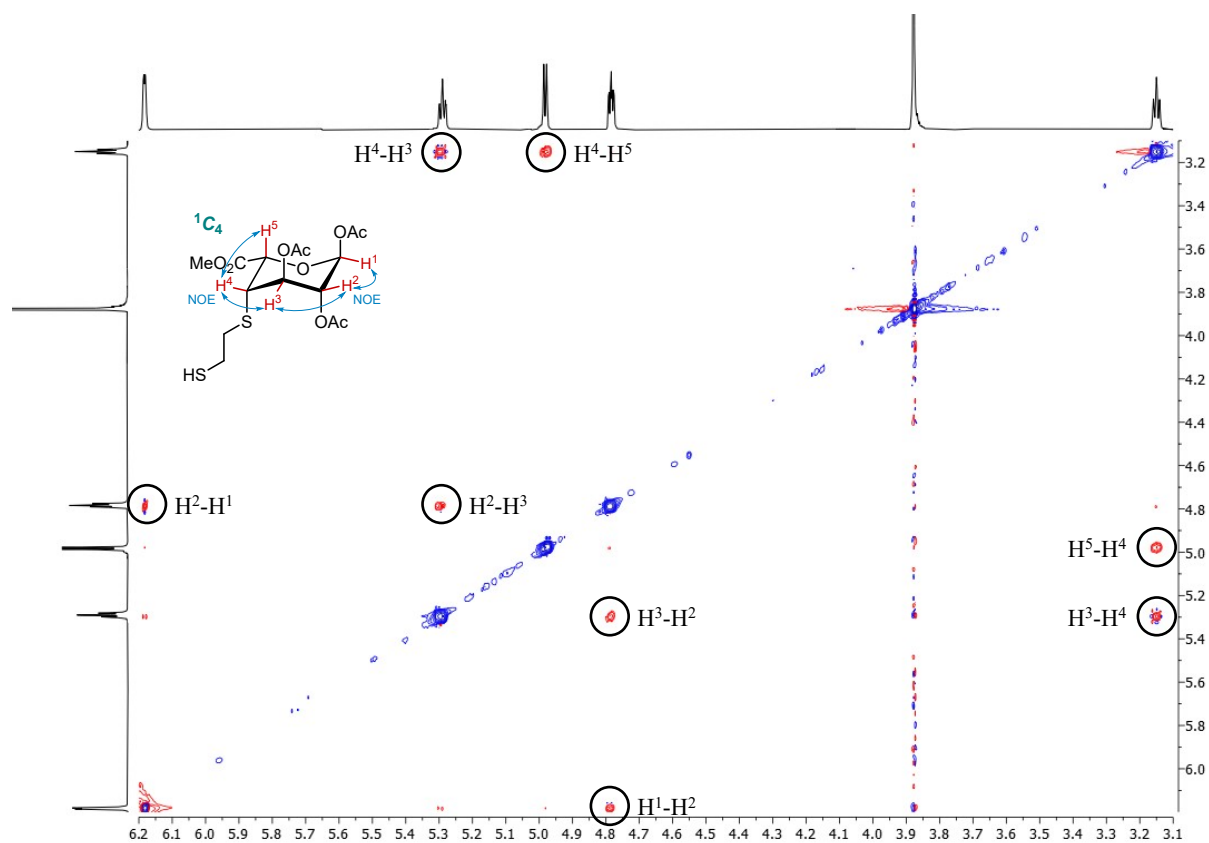

$^1\text{H}$  NMR (400 MHz,  $\text{CDCl}_3$ ) and  $^{13}\text{C}\{^1\text{H}\}$  NMR (101 MHz,  $\text{CDCl}_3$ ) spectra of **6a**

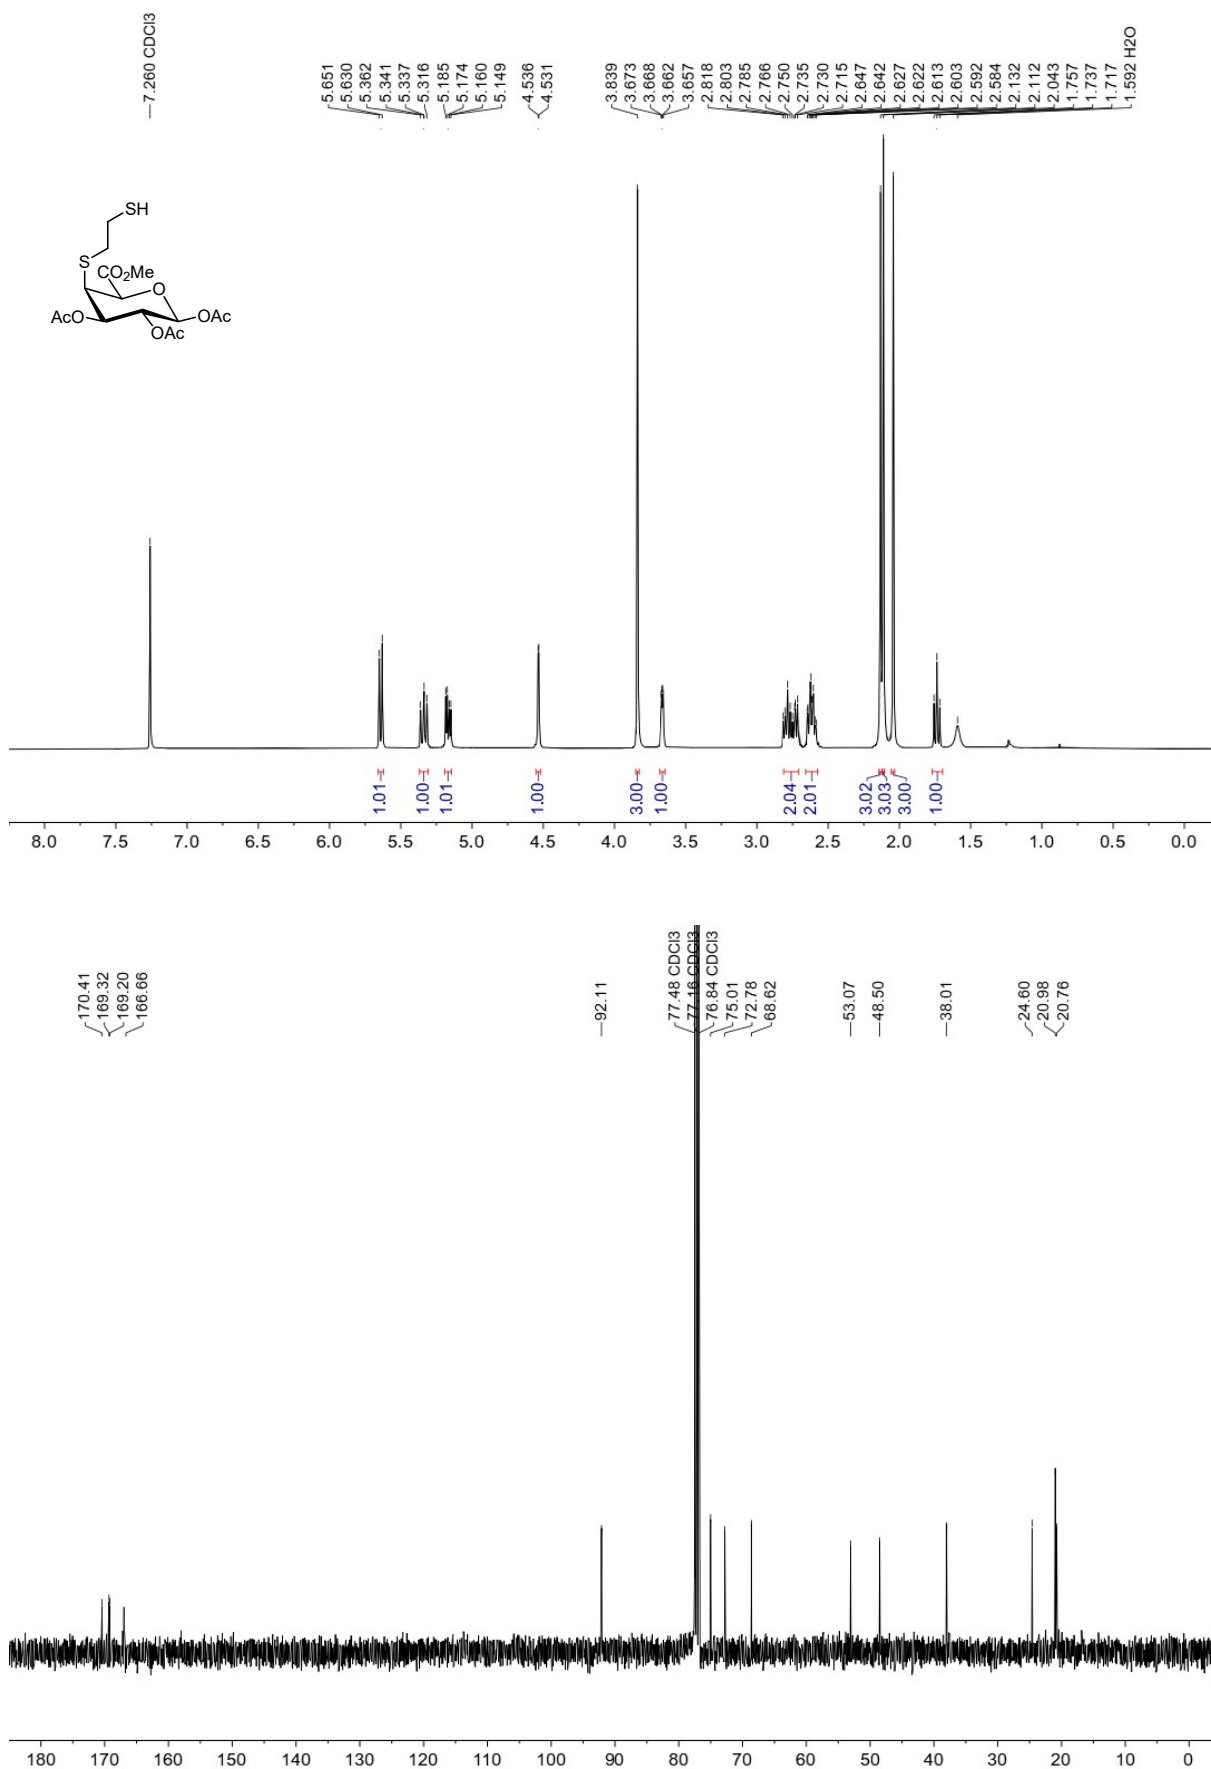

2D  $^1\text{H}$ ,  $^1\text{H}$ -NOESY (400 MHz,  $\text{CDCl}_3$ ) spectra of **6a**

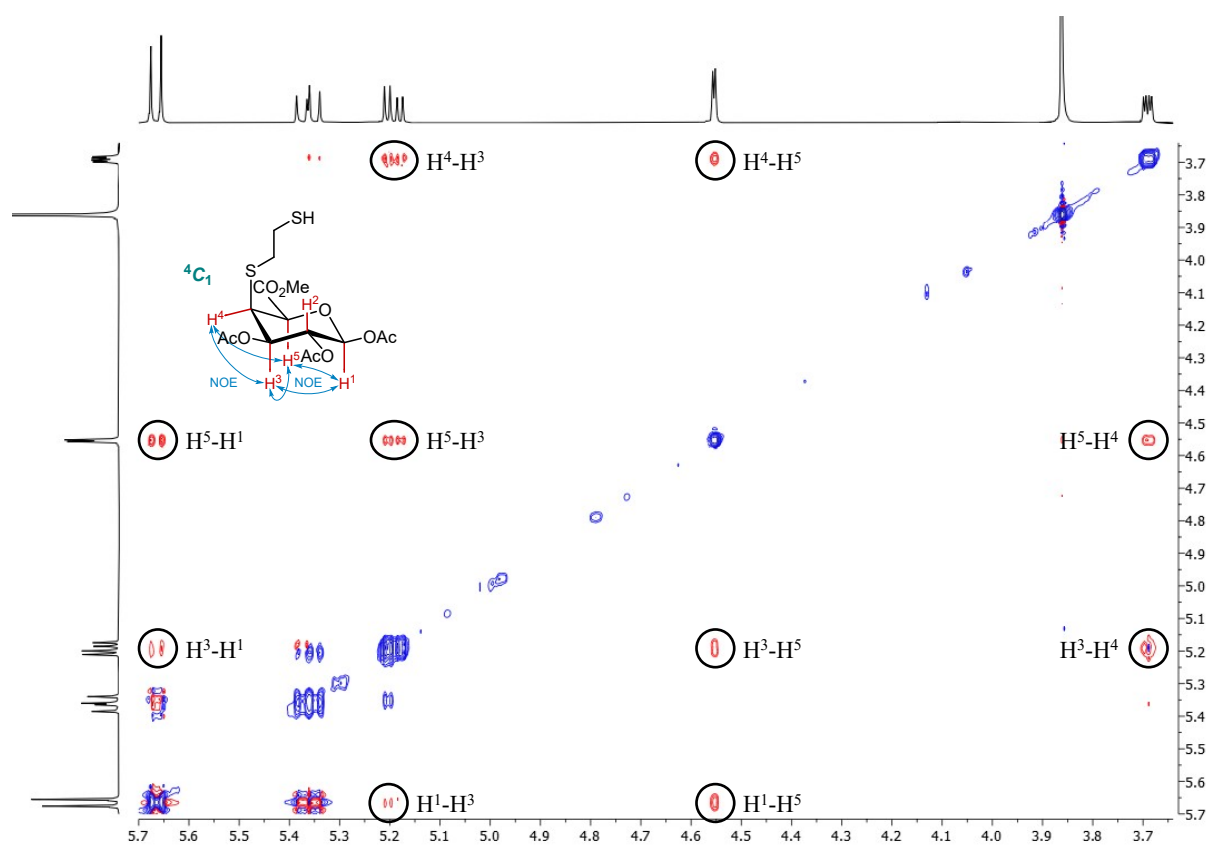

$^1\text{H}$  NMR (400 MHz,  $\text{CDCl}_3$ ) and  $^{13}\text{C}\{^1\text{H}\}$  NMR (101 MHz,  $\text{CDCl}_3$ ) spectra of **6a'**

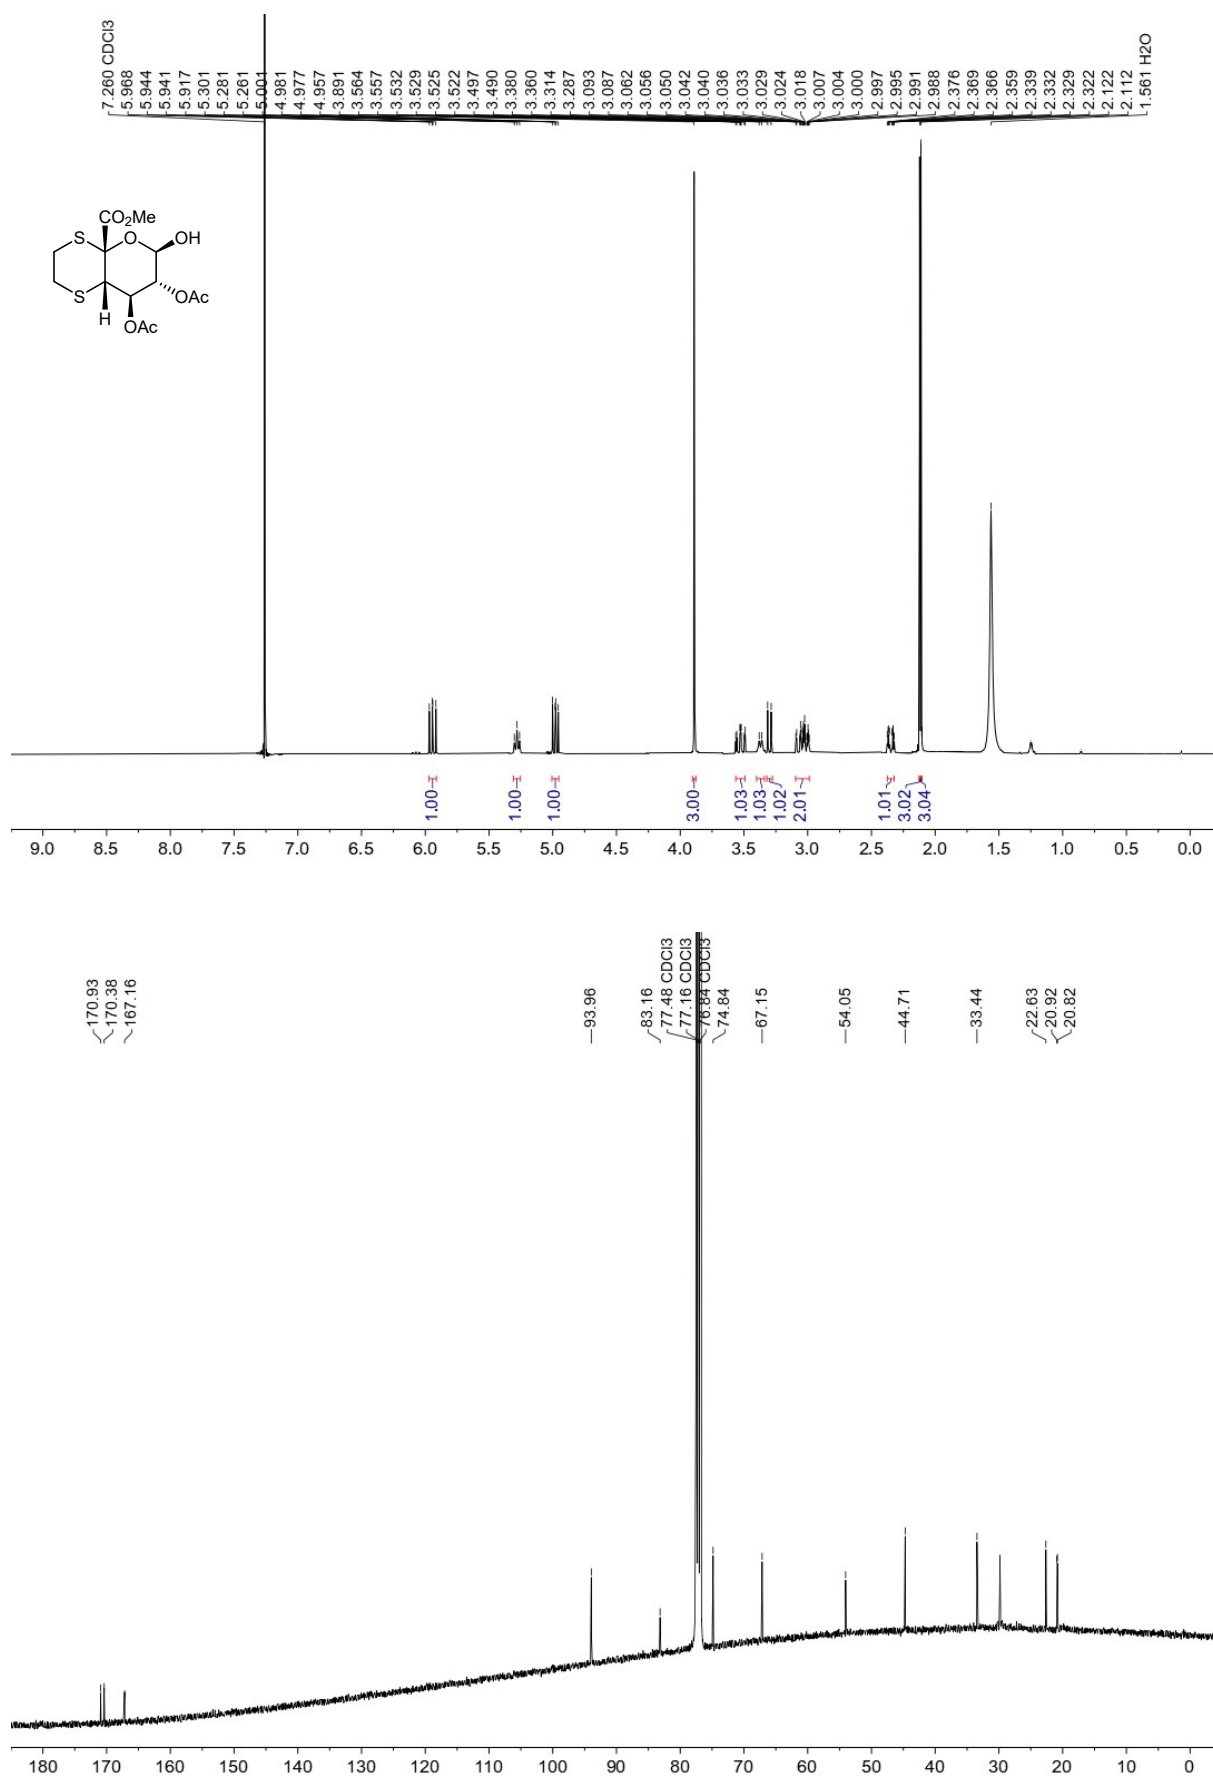

$^1\text{H}$  NMR (400 MHz,  $\text{CDCl}_3$ ) and  $^{13}\text{C}\{^1\text{H}\}$  NMR (101 MHz,  $\text{CDCl}_3$ ) spectra of **5b**

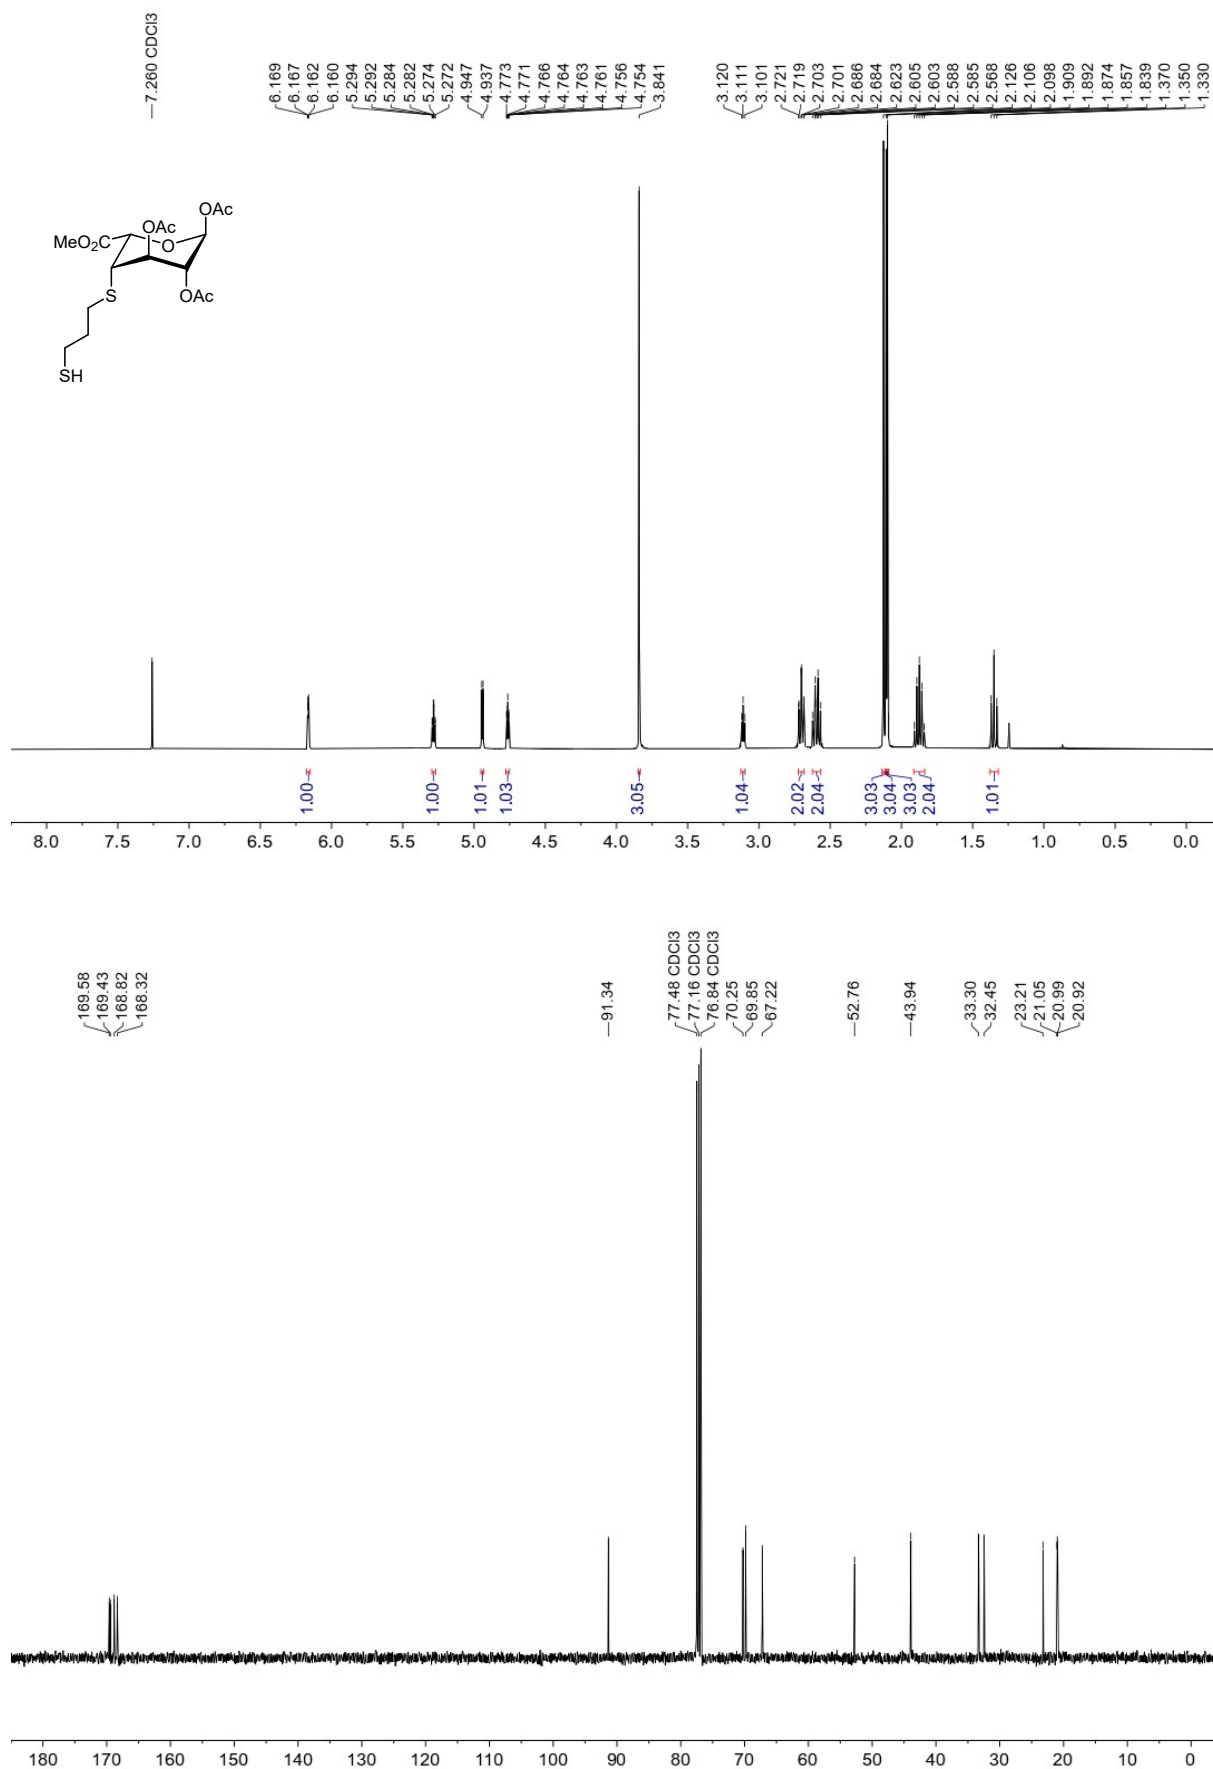



$^1\text{H}$  NMR (400 MHz,  $\text{CDCl}_3$ ) and  $^{13}\text{C}\{^1\text{H}\}$  NMR (101 MHz,  $\text{CDCl}_3$ ) spectra of **6b**

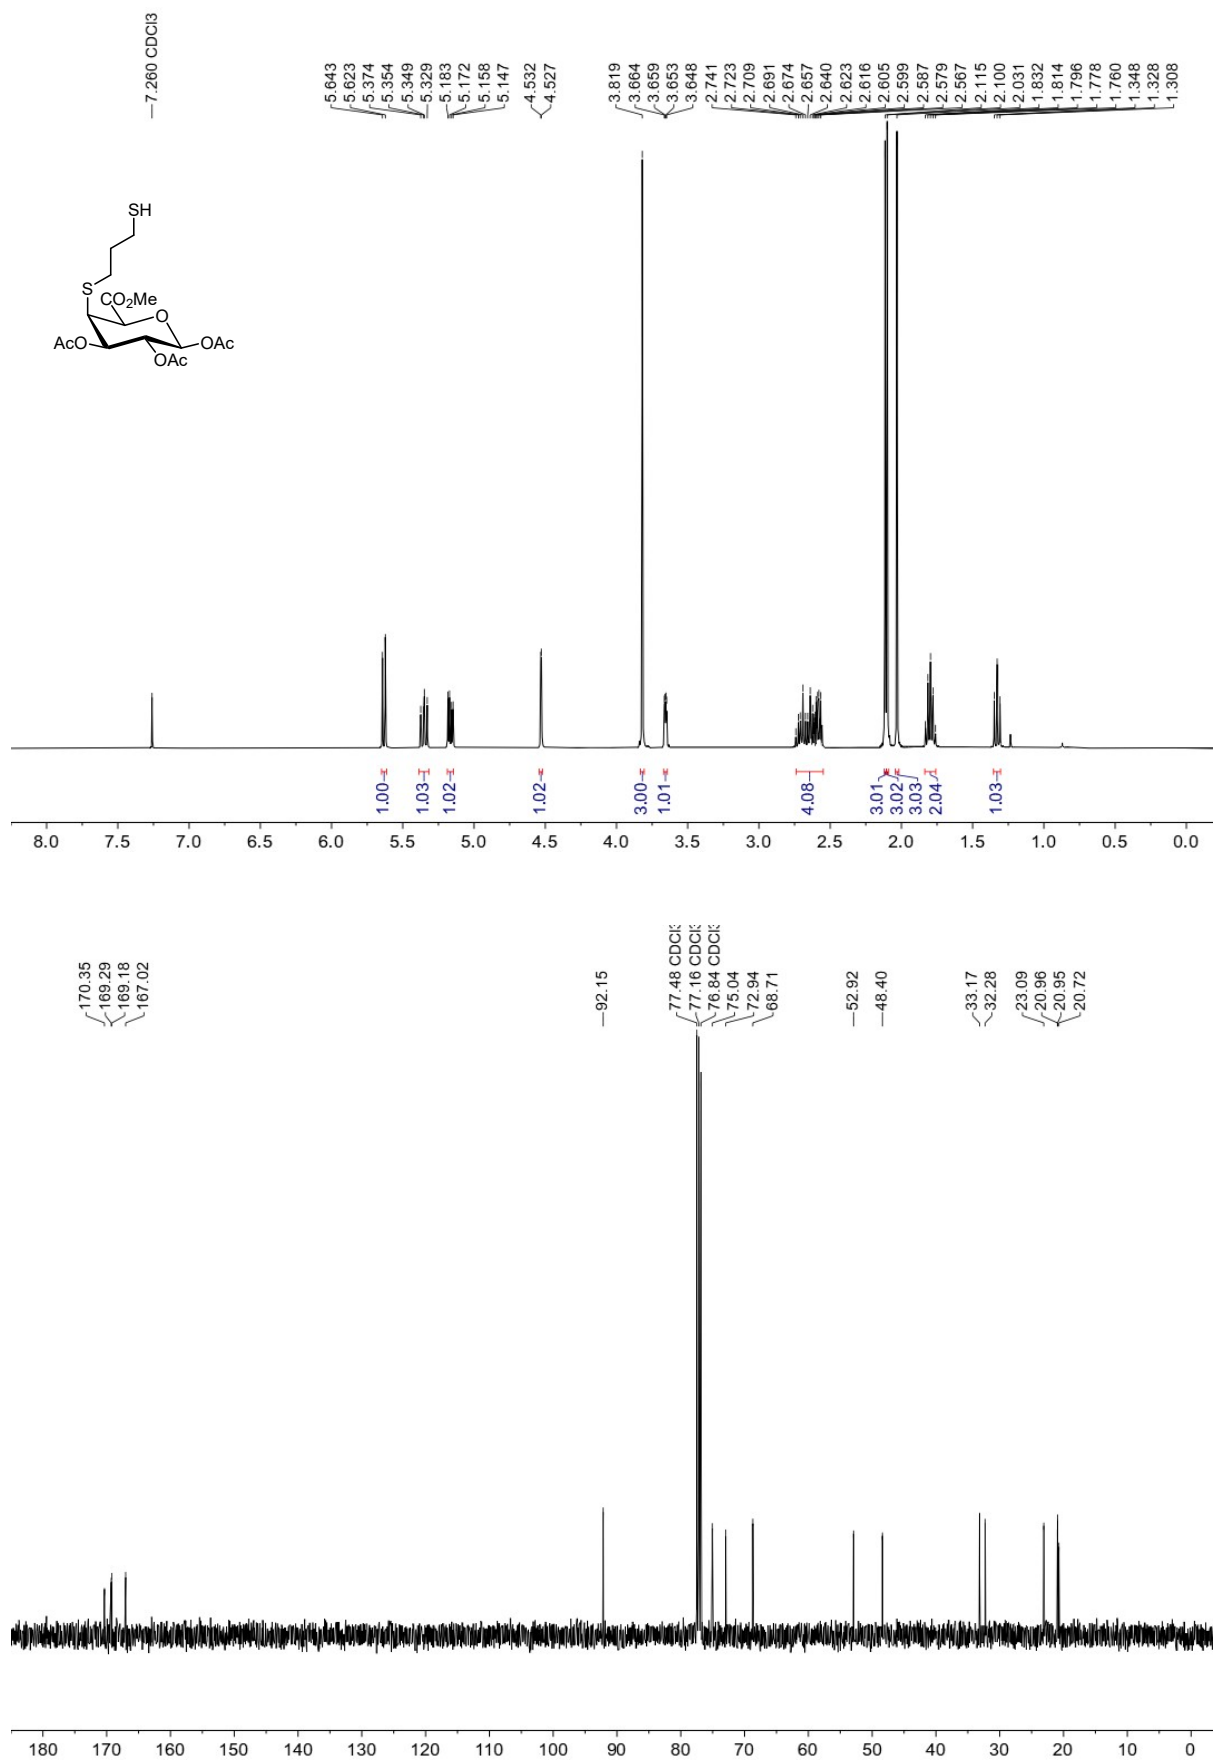

$^1\text{H}$  NMR (400 MHz,  $\text{CDCl}_3$ ) and  $^{13}\text{C}\{^1\text{H}\}$  NMR (101 MHz,  $\text{CDCl}_3$ ) spectra of **5c**

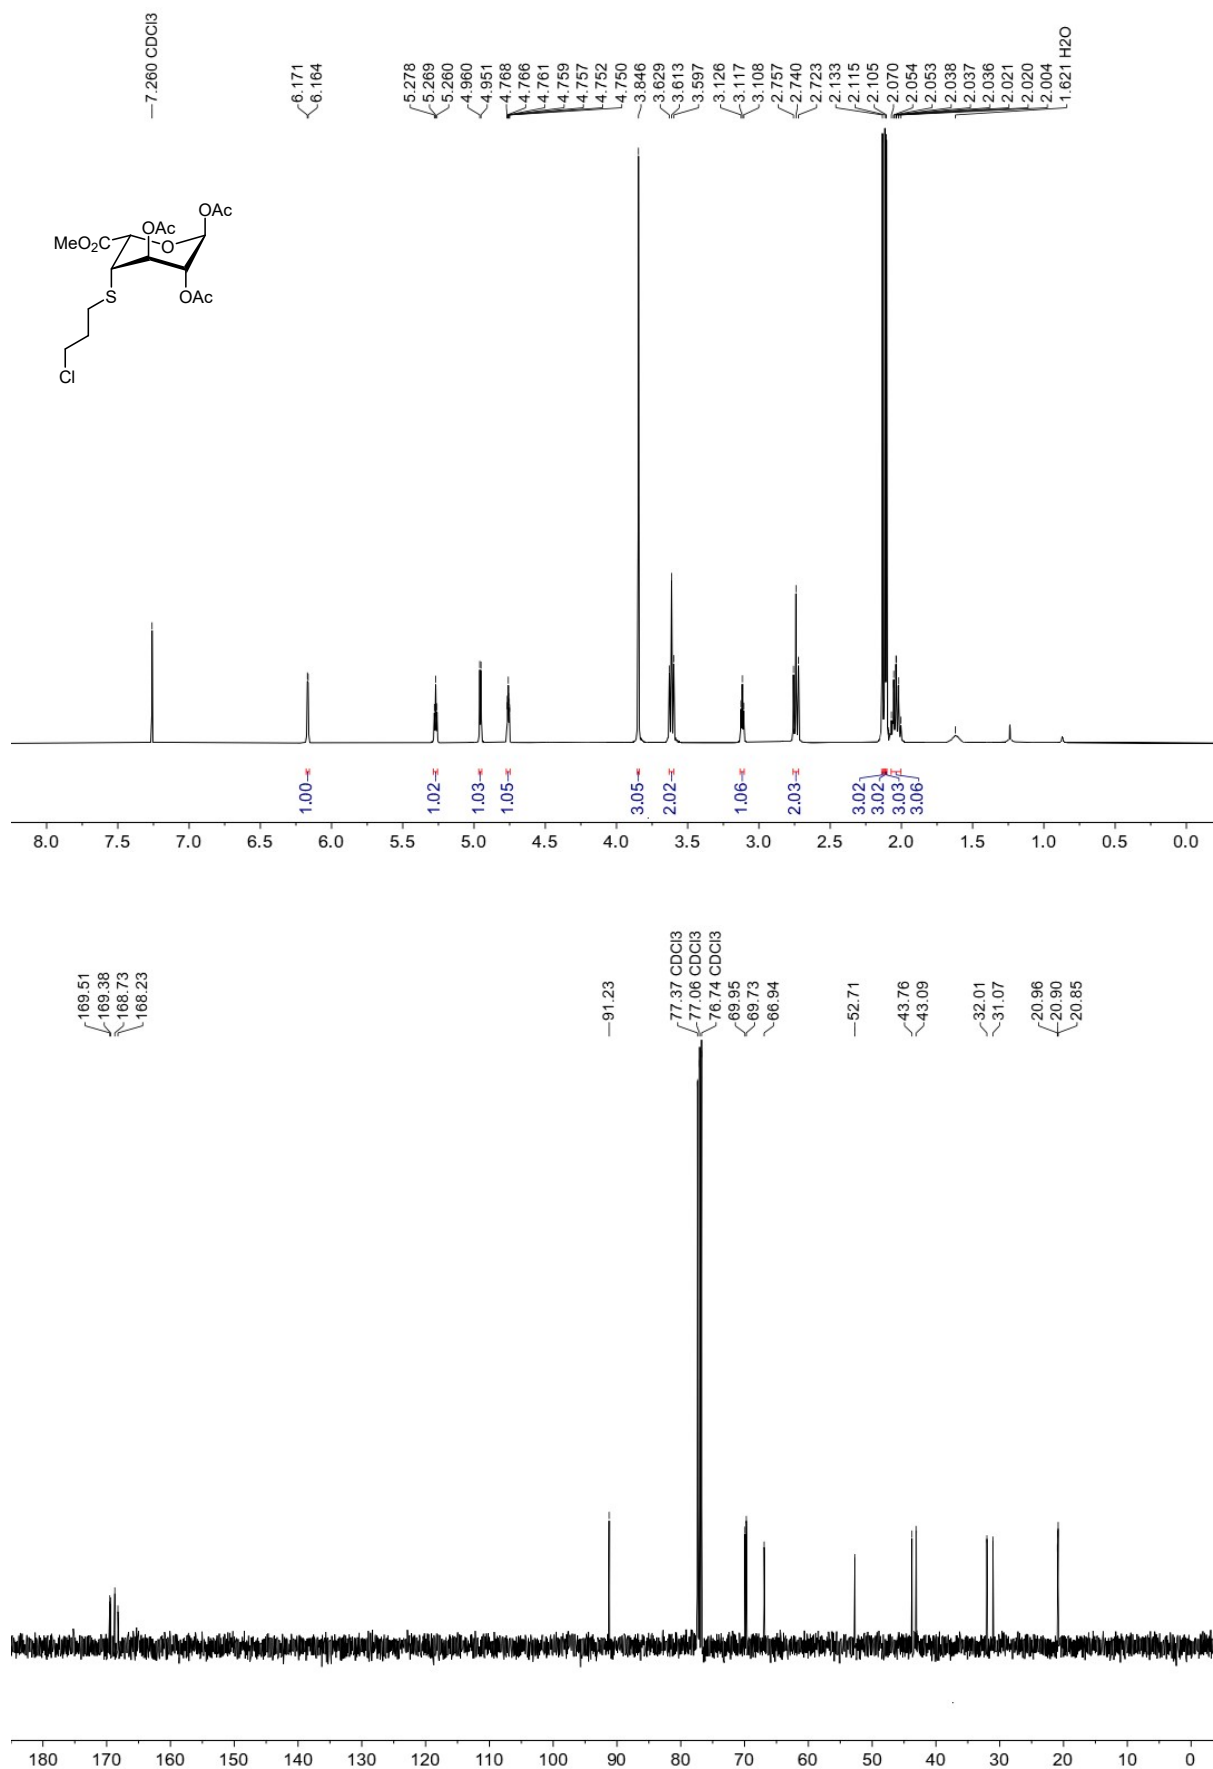

$^1\text{H}$  NMR (400 MHz,  $\text{CDCl}_3$ ) and  $^{13}\text{C}\{^1\text{H}\}$  NMR (101 MHz,  $\text{CDCl}_3$ ) spectra of **6c**

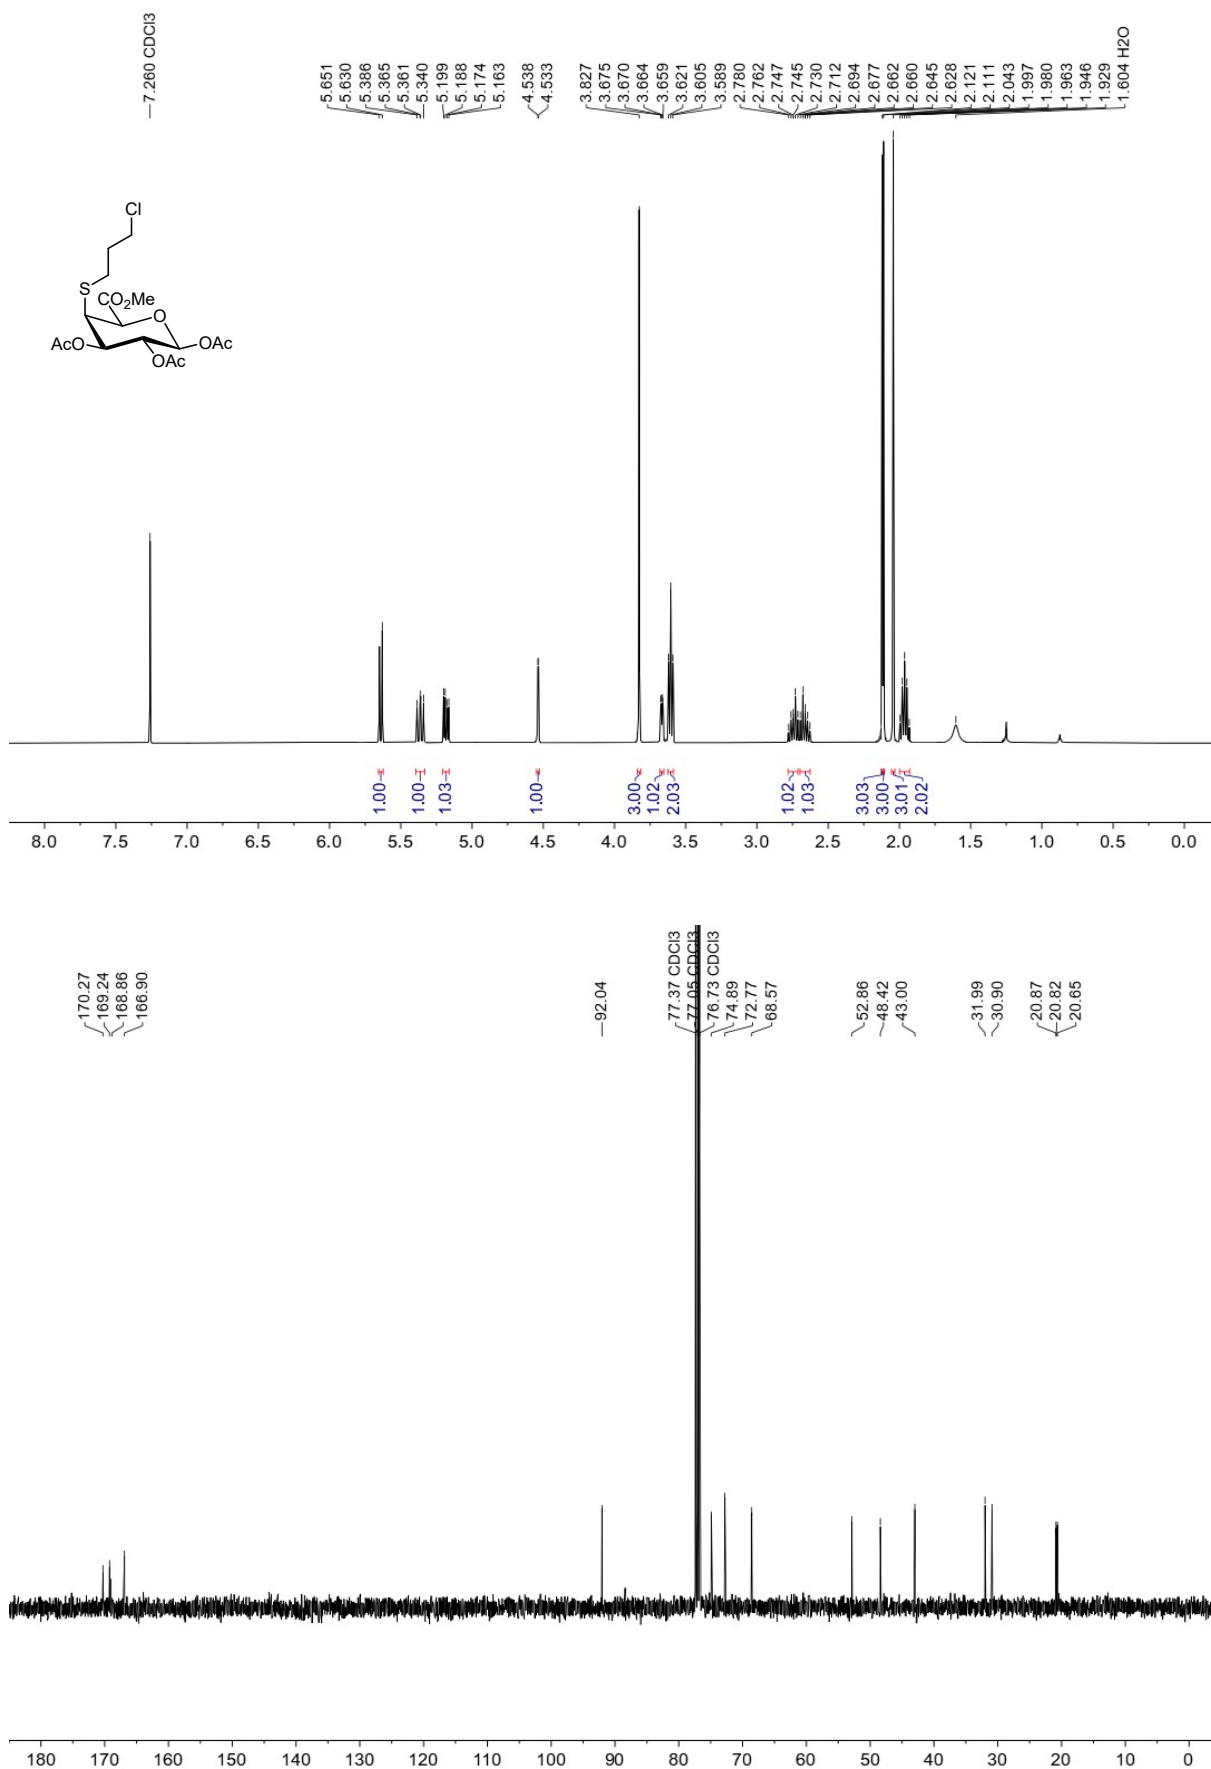

$^1\text{H}$  NMR (400 MHz,  $\text{CDCl}_3$ ) and  $^{13}\text{C}\{^1\text{H}\}$  NMR (101 MHz,  $\text{CDCl}_3$ ) spectra of **5d**

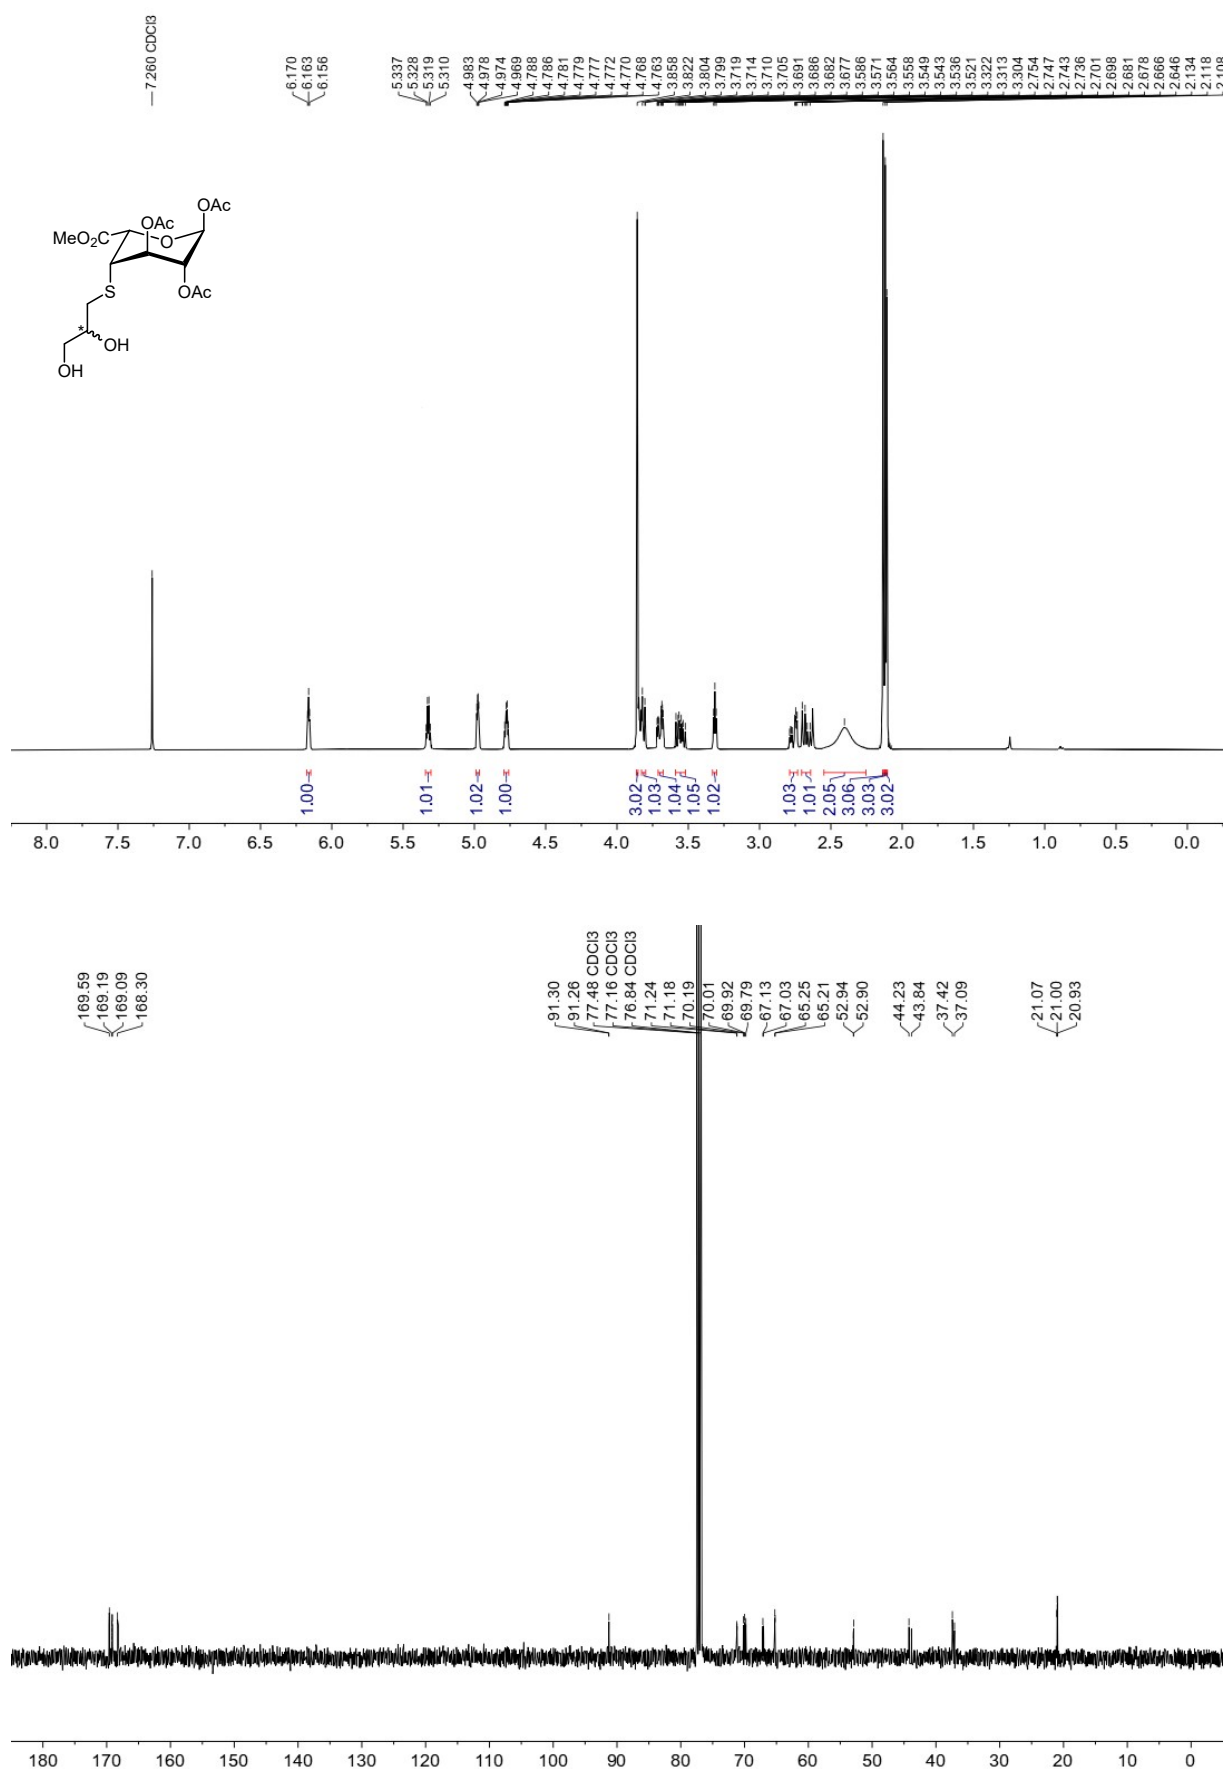

$^1\text{H}$  NMR (400 MHz,  $\text{CDCl}_3$ ) and  $^{13}\text{C}\{^1\text{H}\}$  NMR (101 MHz,  $\text{CDCl}_3$ ) spectra of **6d**

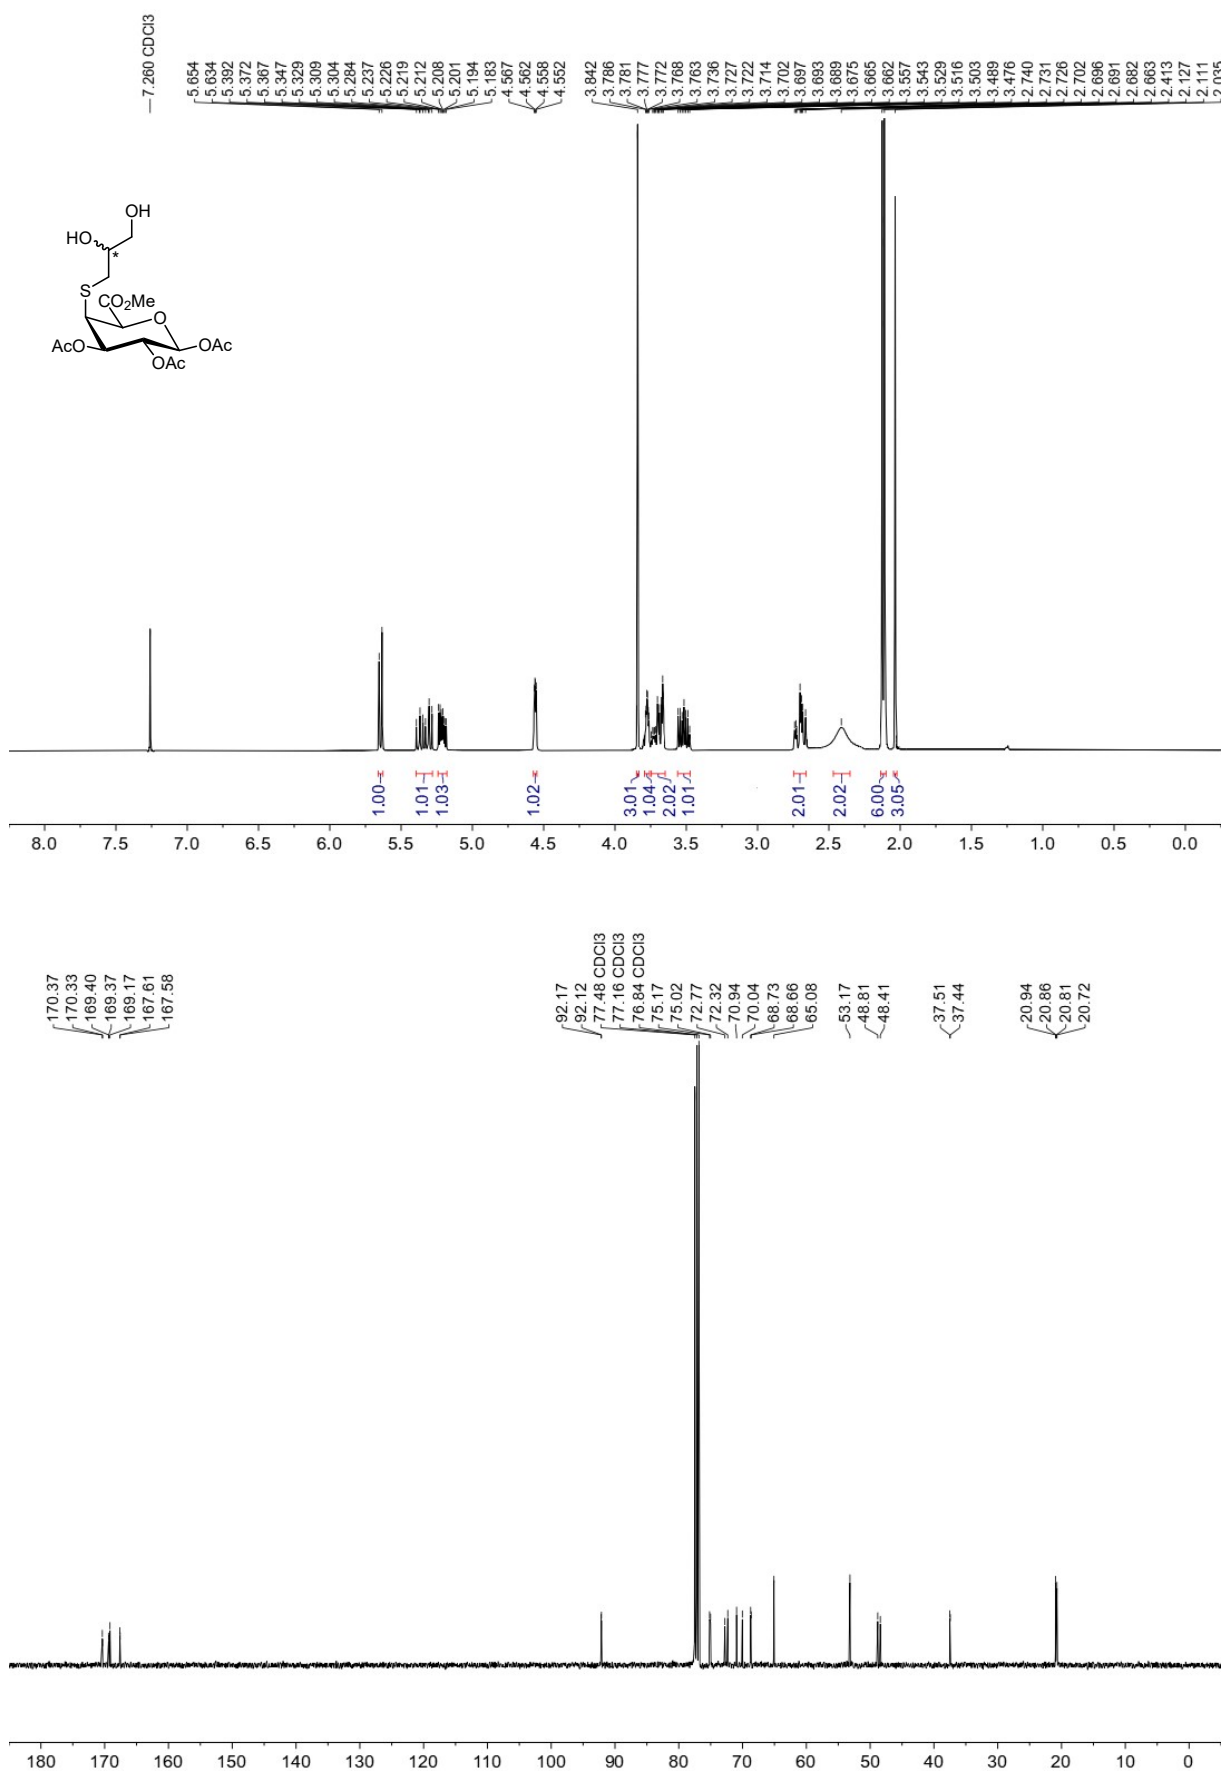

$^1\text{H}$  NMR (400 MHz,  $\text{CDCl}_3$ ) and  $^{13}\text{C}\{^1\text{H}\}$  NMR (101 MHz,  $\text{CDCl}_3$ ) spectra of **5e**

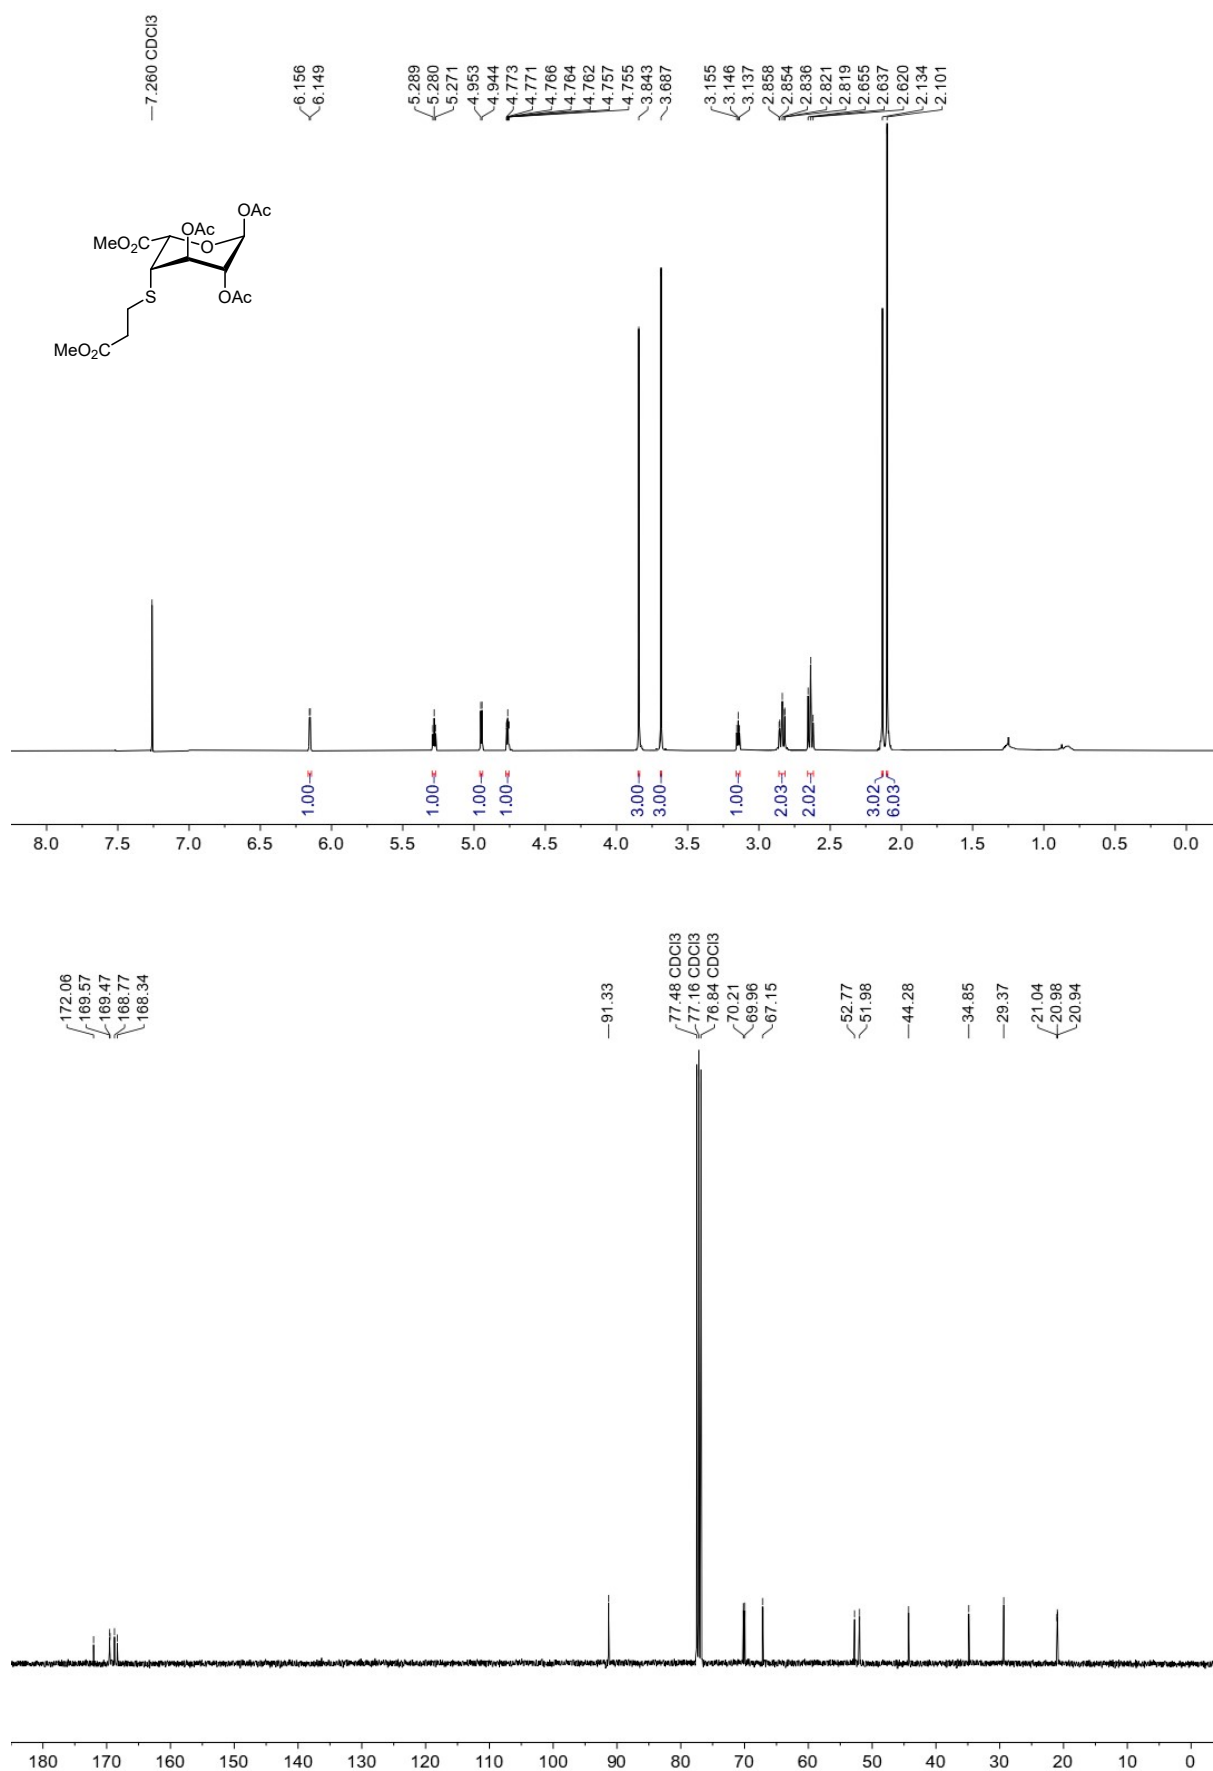

$^1\text{H}$  NMR (400 MHz,  $\text{CDCl}_3$ ) and  $^{13}\text{C}\{^1\text{H}\}$  NMR (101 MHz,  $\text{CDCl}_3$ ) spectra of **6e**

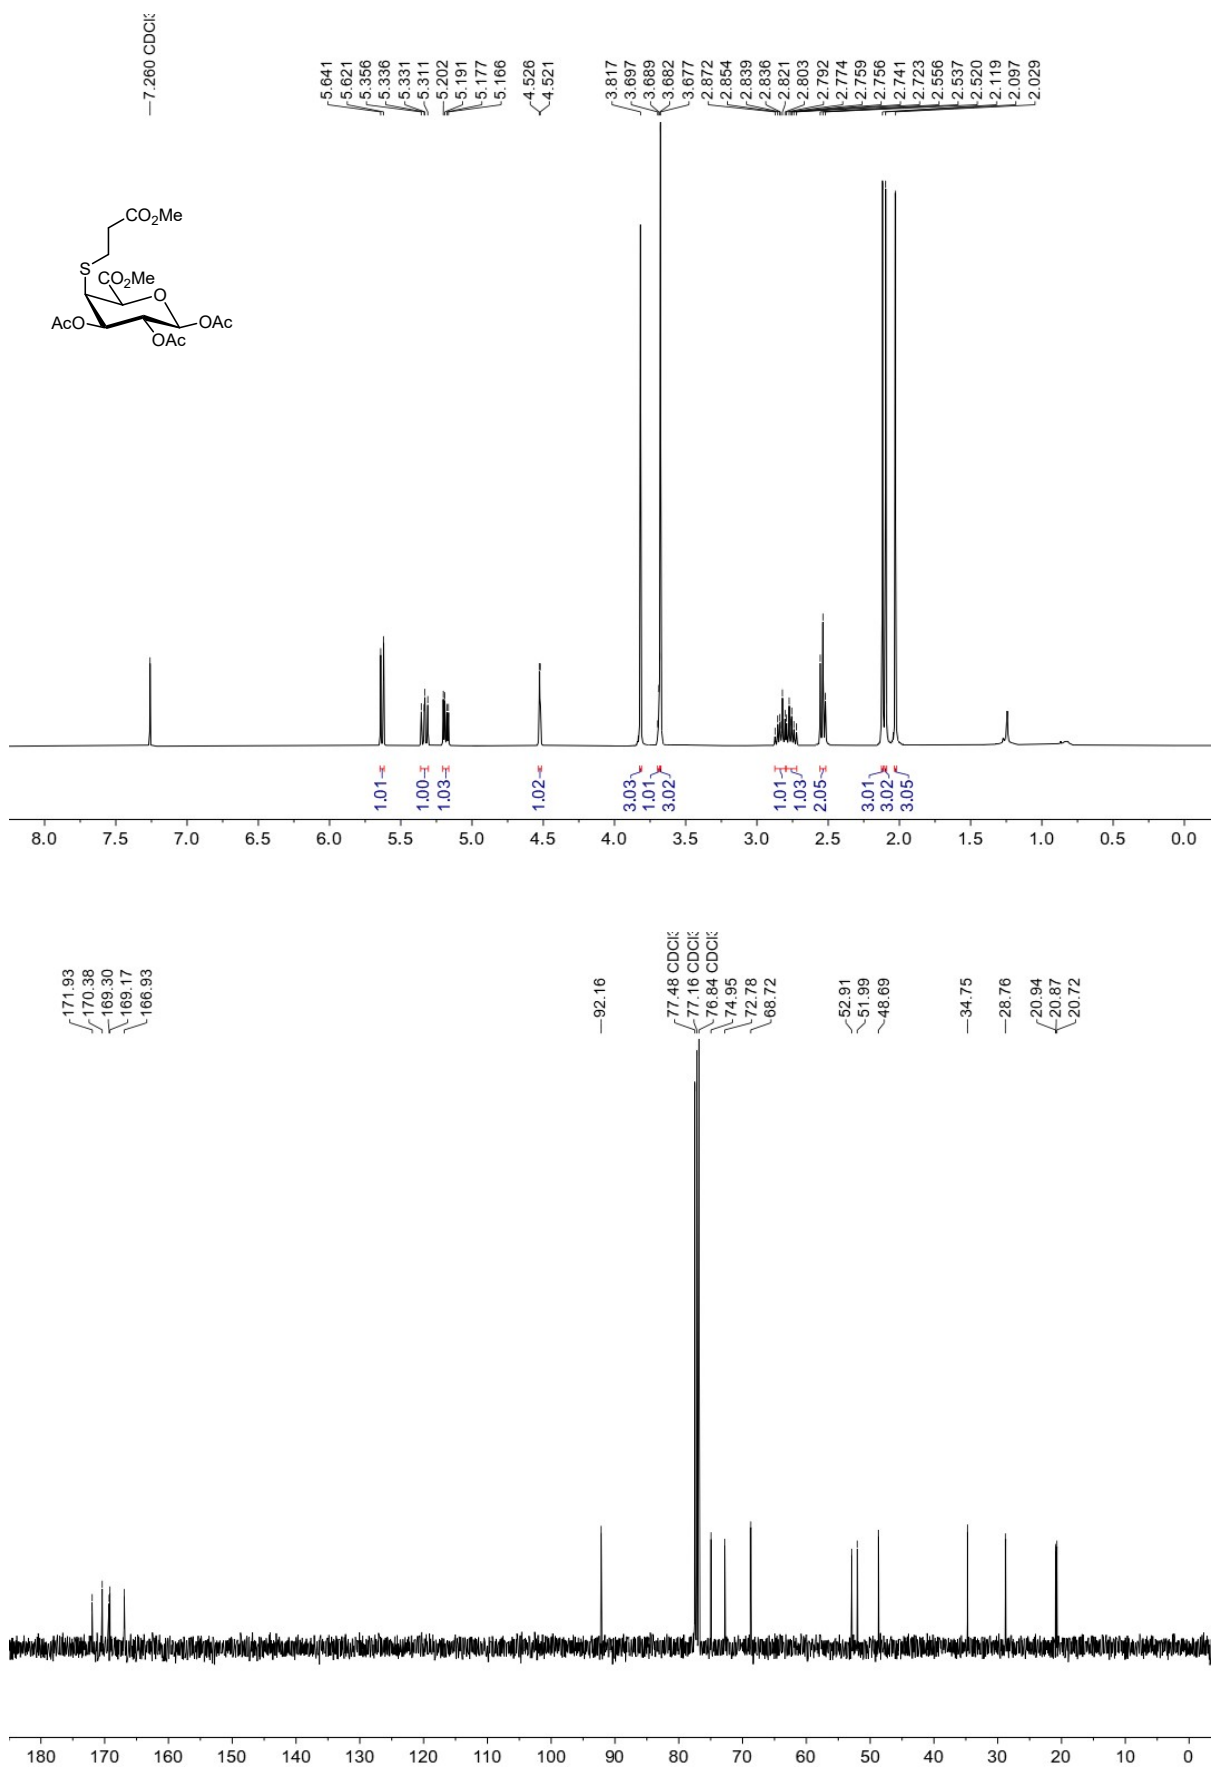

$^1\text{H}$  NMR (600 MHz,  $\text{CDCl}_3$ ) and  $^{13}\text{C}\{^1\text{H}\}$  NMR (151 MHz,  $\text{CDCl}_3$ ) spectra of **5f**

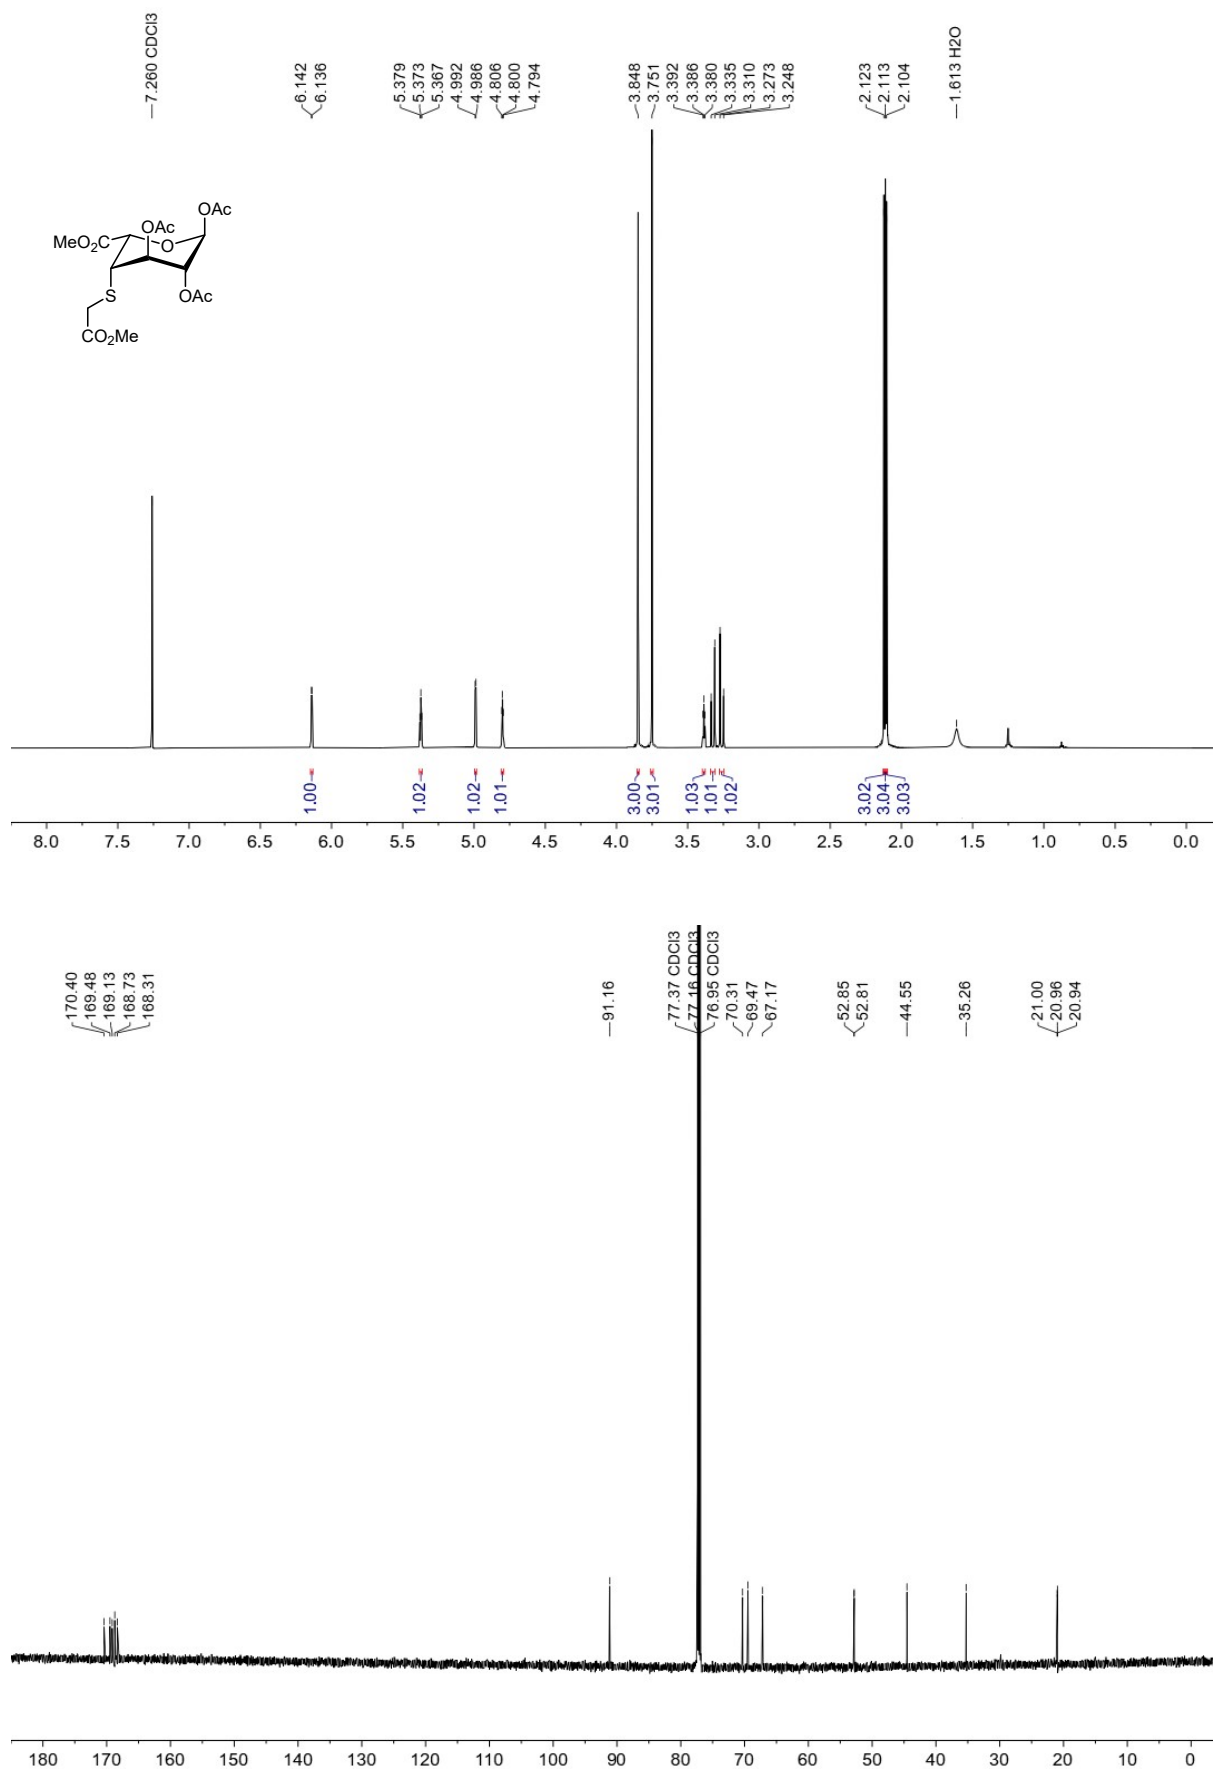



$^1\text{H}$  NMR (600 MHz,  $\text{CDCl}_3$ ) and  $^{13}\text{C}\{^1\text{H}\}$  NMR (151 MHz,  $\text{CDCl}_3$ ) spectra of **6f**

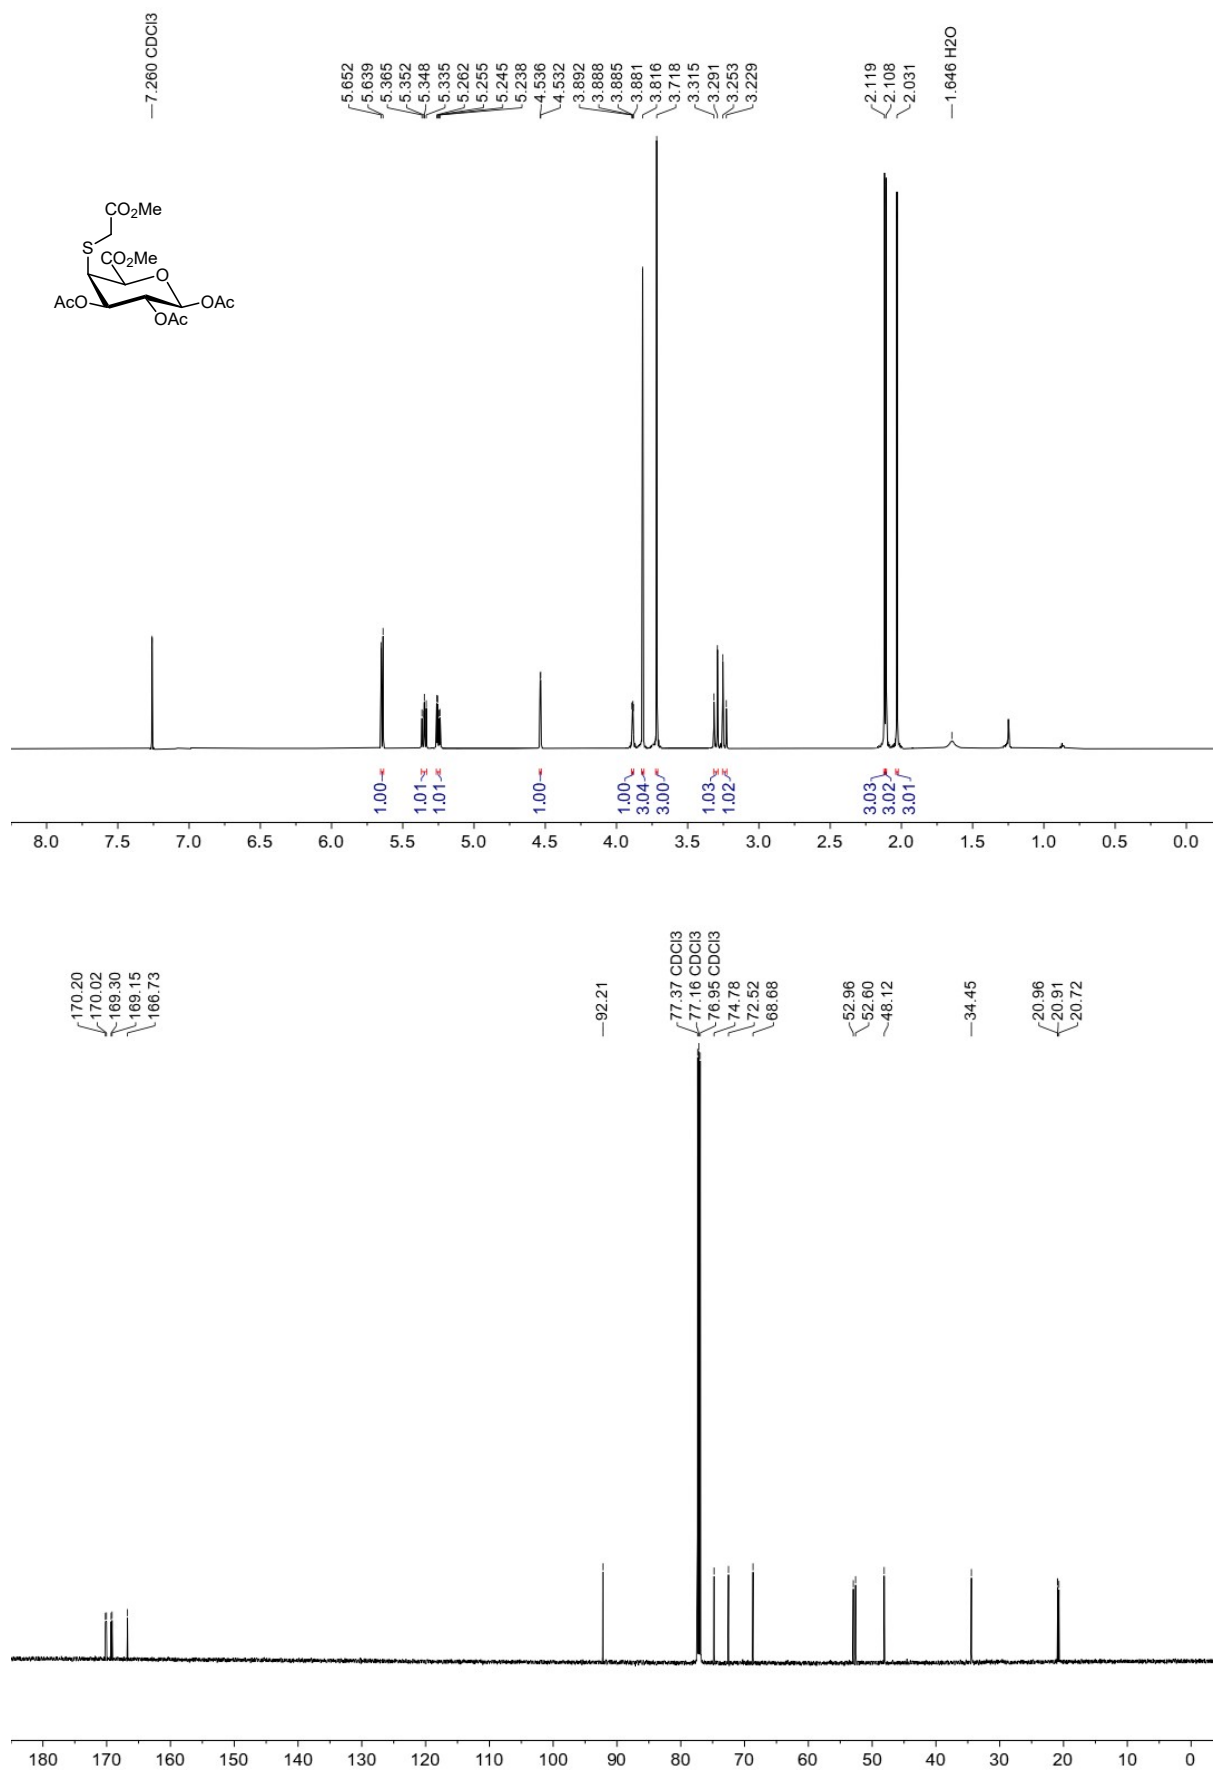

$^1\text{H}$  NMR (400 MHz,  $\text{CDCl}_3$ ) and  $^{13}\text{C}\{^1\text{H}\}$  NMR (101 MHz,  $\text{CDCl}_3$ ) spectra of **5g**

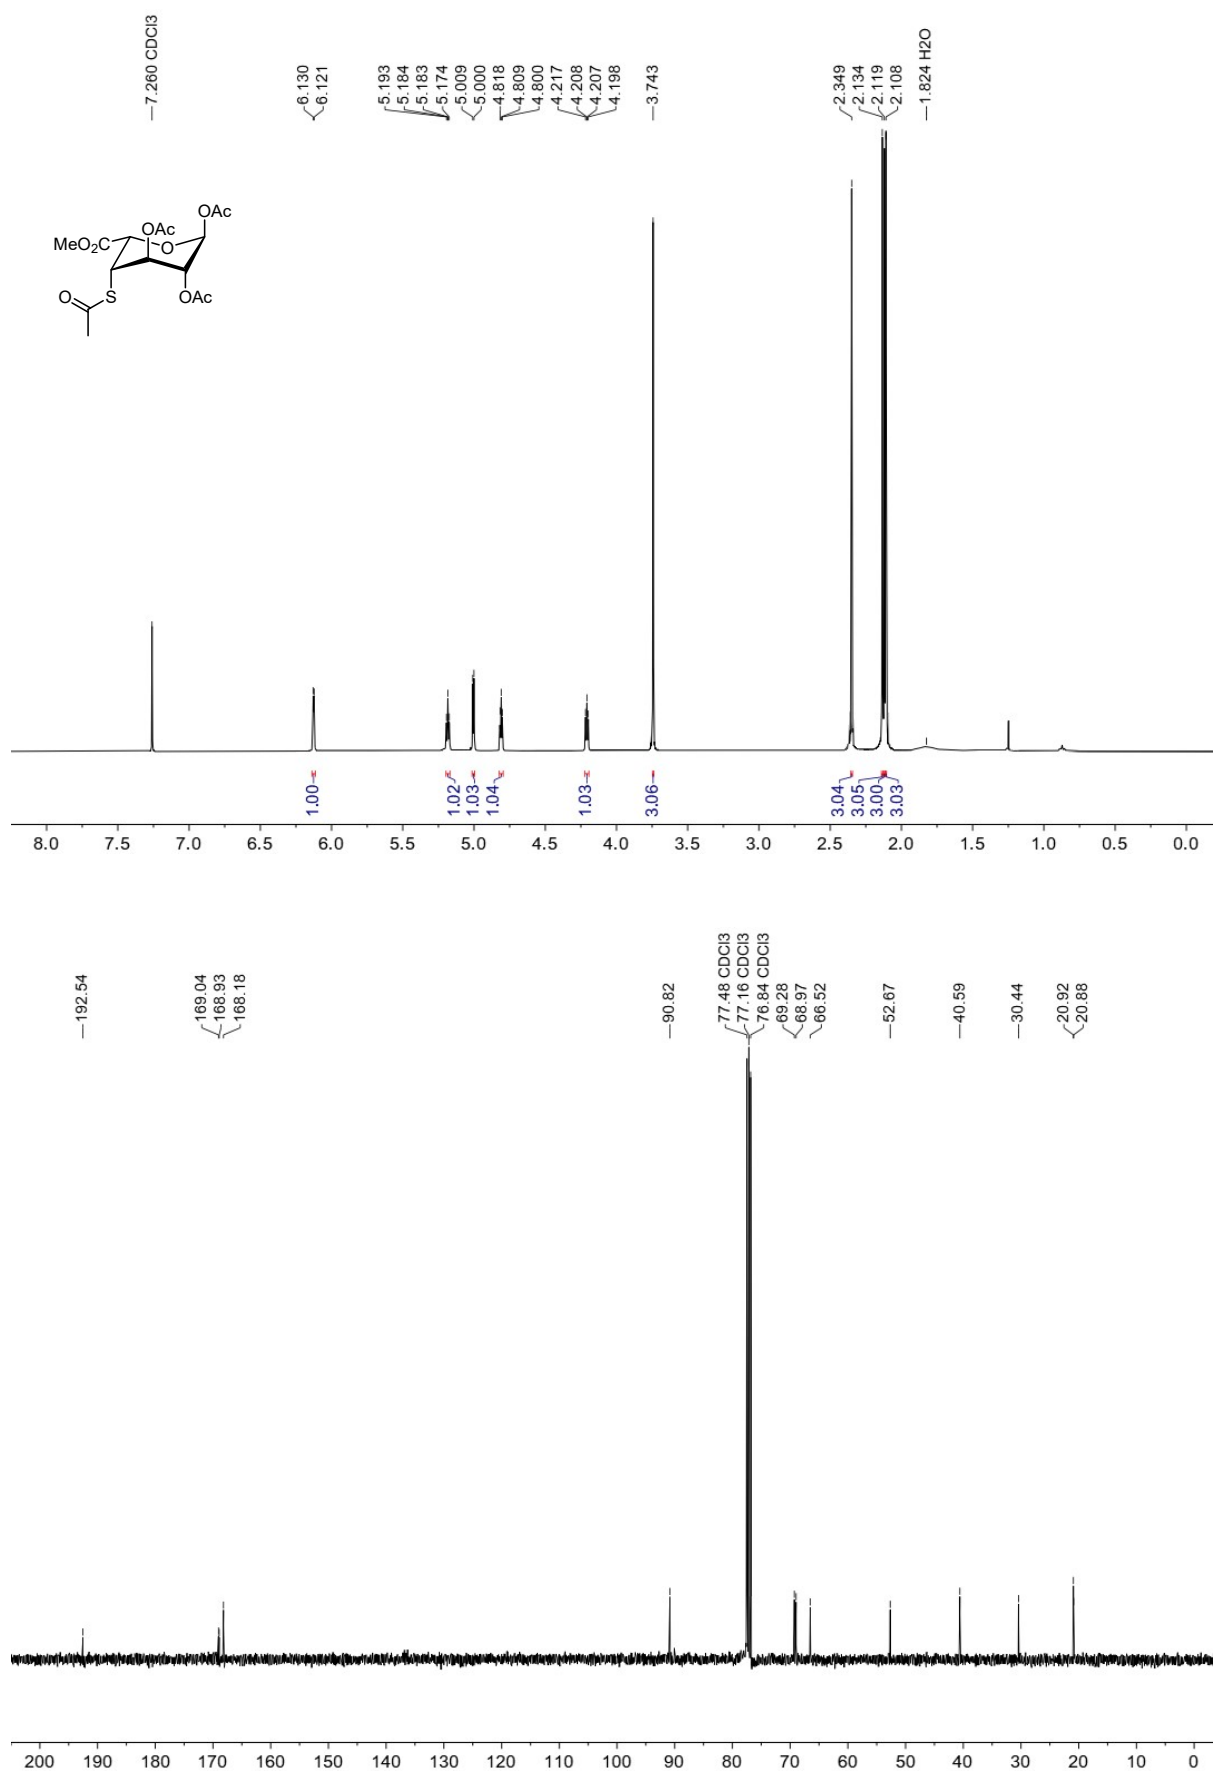

$^1\text{H}$  NMR (400 MHz,  $\text{CDCl}_3$ ) and  $^{13}\text{C}\{^1\text{H}\}$  NMR (101 MHz,  $\text{CDCl}_3$ ) spectra of **6g**

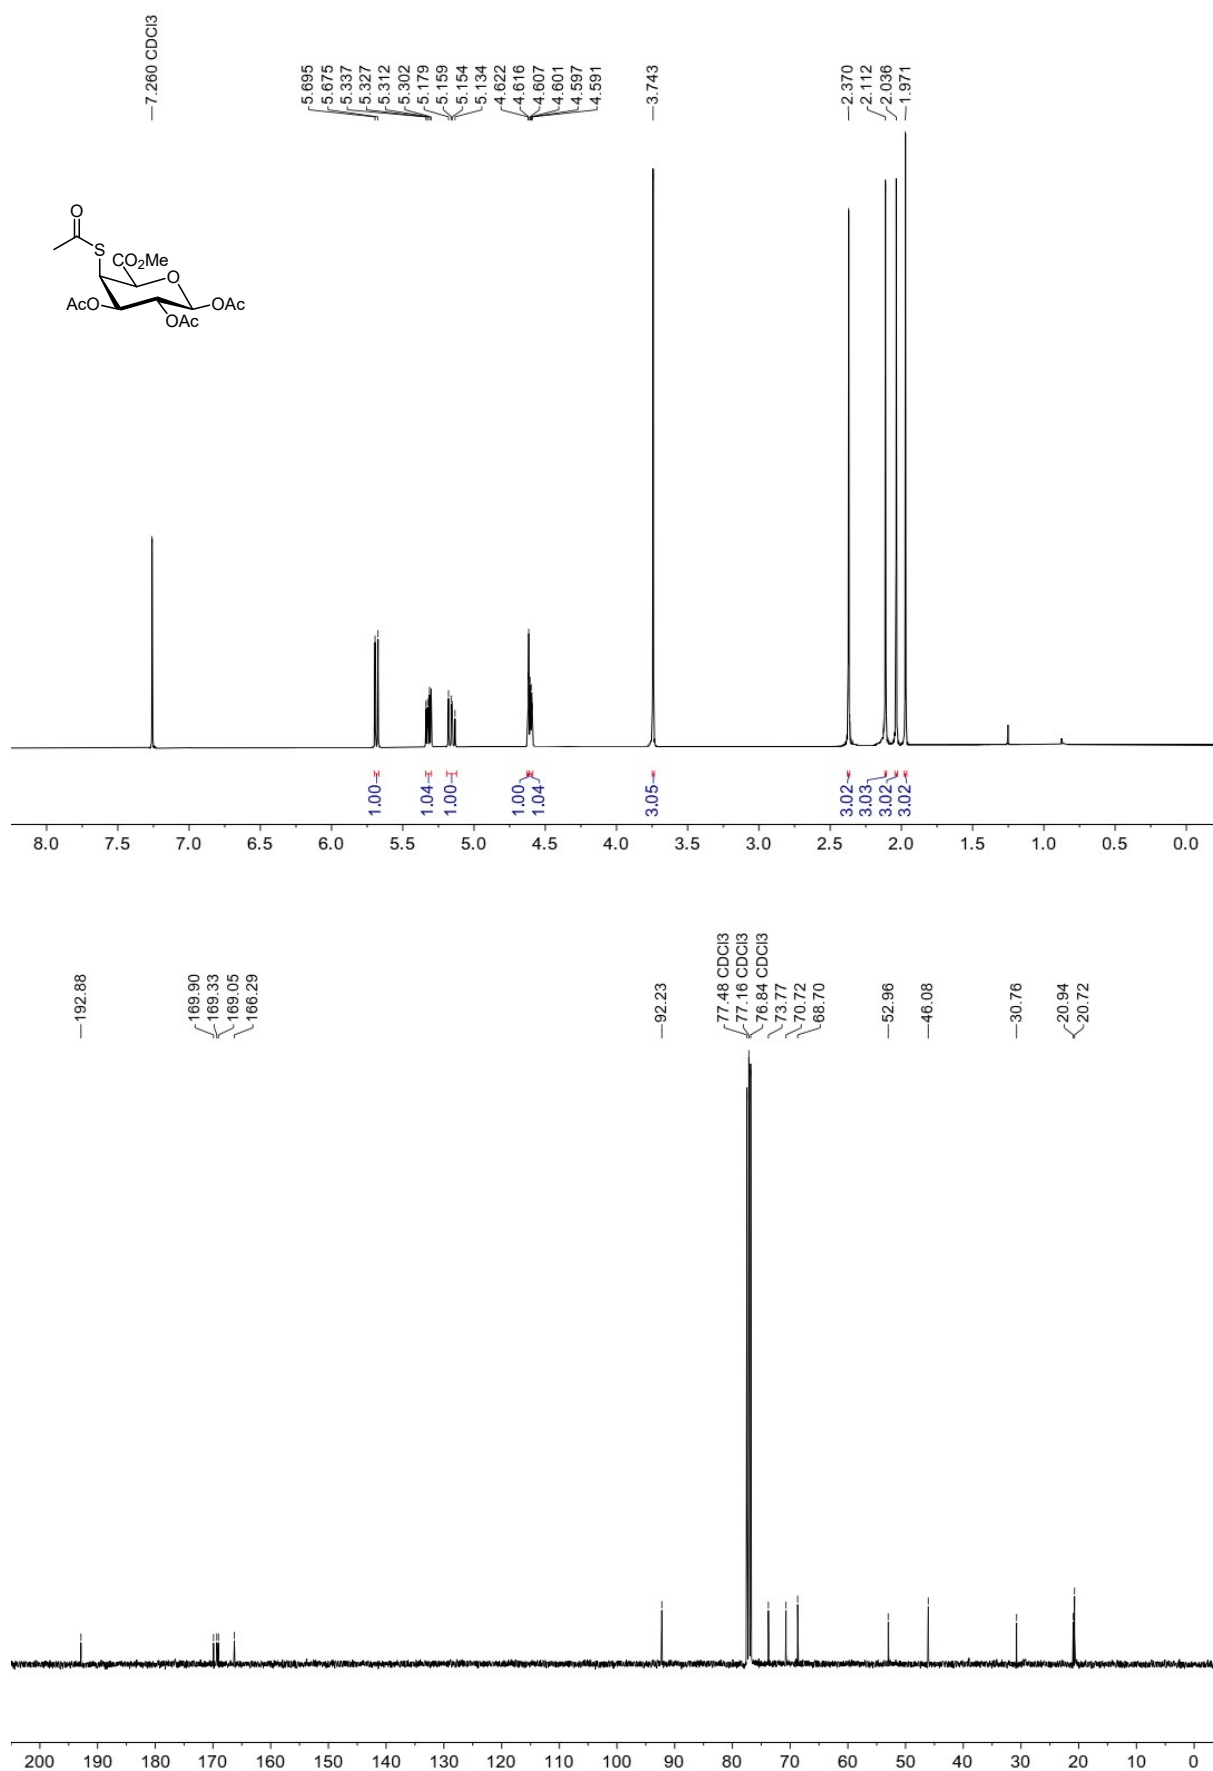

**Chemical structure of compound 10:** CCOC(=O)[C@H]1[C@@H](OC(=O)C)[C@H](OC(=O)C)[C@H](OC(=O)C)[C@H]1S[C@@H]1Cc2ccccc2

**<sup>1</sup>H NMR (400 MHz, CDCl<sub>3</sub>) peaks (ppm):** 7.334, 7.330, 7.326, 7.313, 7.309, 7.296, 7.295, 7.289, 7.277, 7.272, 7.269, 7.260 CDCl<sub>3</sub>, 7.226, 7.221, 7.205, 7.202, 5.626, 5.606, 5.359, 5.339, 5.334, 5.314, 5.142, 5.131, 5.117, 5.106, 4.464, 4.460, 3.726, 3.693, 3.666, 3.633, 3.611, 3.607, 3.600, 3.596, 2.102, 2.023, 1.970, 1.649 H<sub>2</sub>O.

**<sup>13</sup>C NMR (100 MHz, CDCl<sub>3</sub>) peaks (ppm):** 170.15, 169.28, 169.20, 166.69, 137.68, 129.28, 128.79, 127.53, 92.17, 77.48 CDCl<sub>3</sub>, 77.16 CDCl<sub>3</sub>, 76.84 CDCl<sub>3</sub>, 74.93, 72.74, 68.86, 52.76, 46.38, 37.65, 20.99, 20.84, 20.74.

## 4. Synthesis of 4,5-glycals 7-10

### 4.1. Synthesis of 7

$^1\text{H}$  NMR (400 MHz,  $\text{CDCl}_3$ ) and  $^{13}\text{C}\{^1\text{H}\}$  NMR (101 MHz,  $\text{CDCl}_3$ ) spectra of **12a**

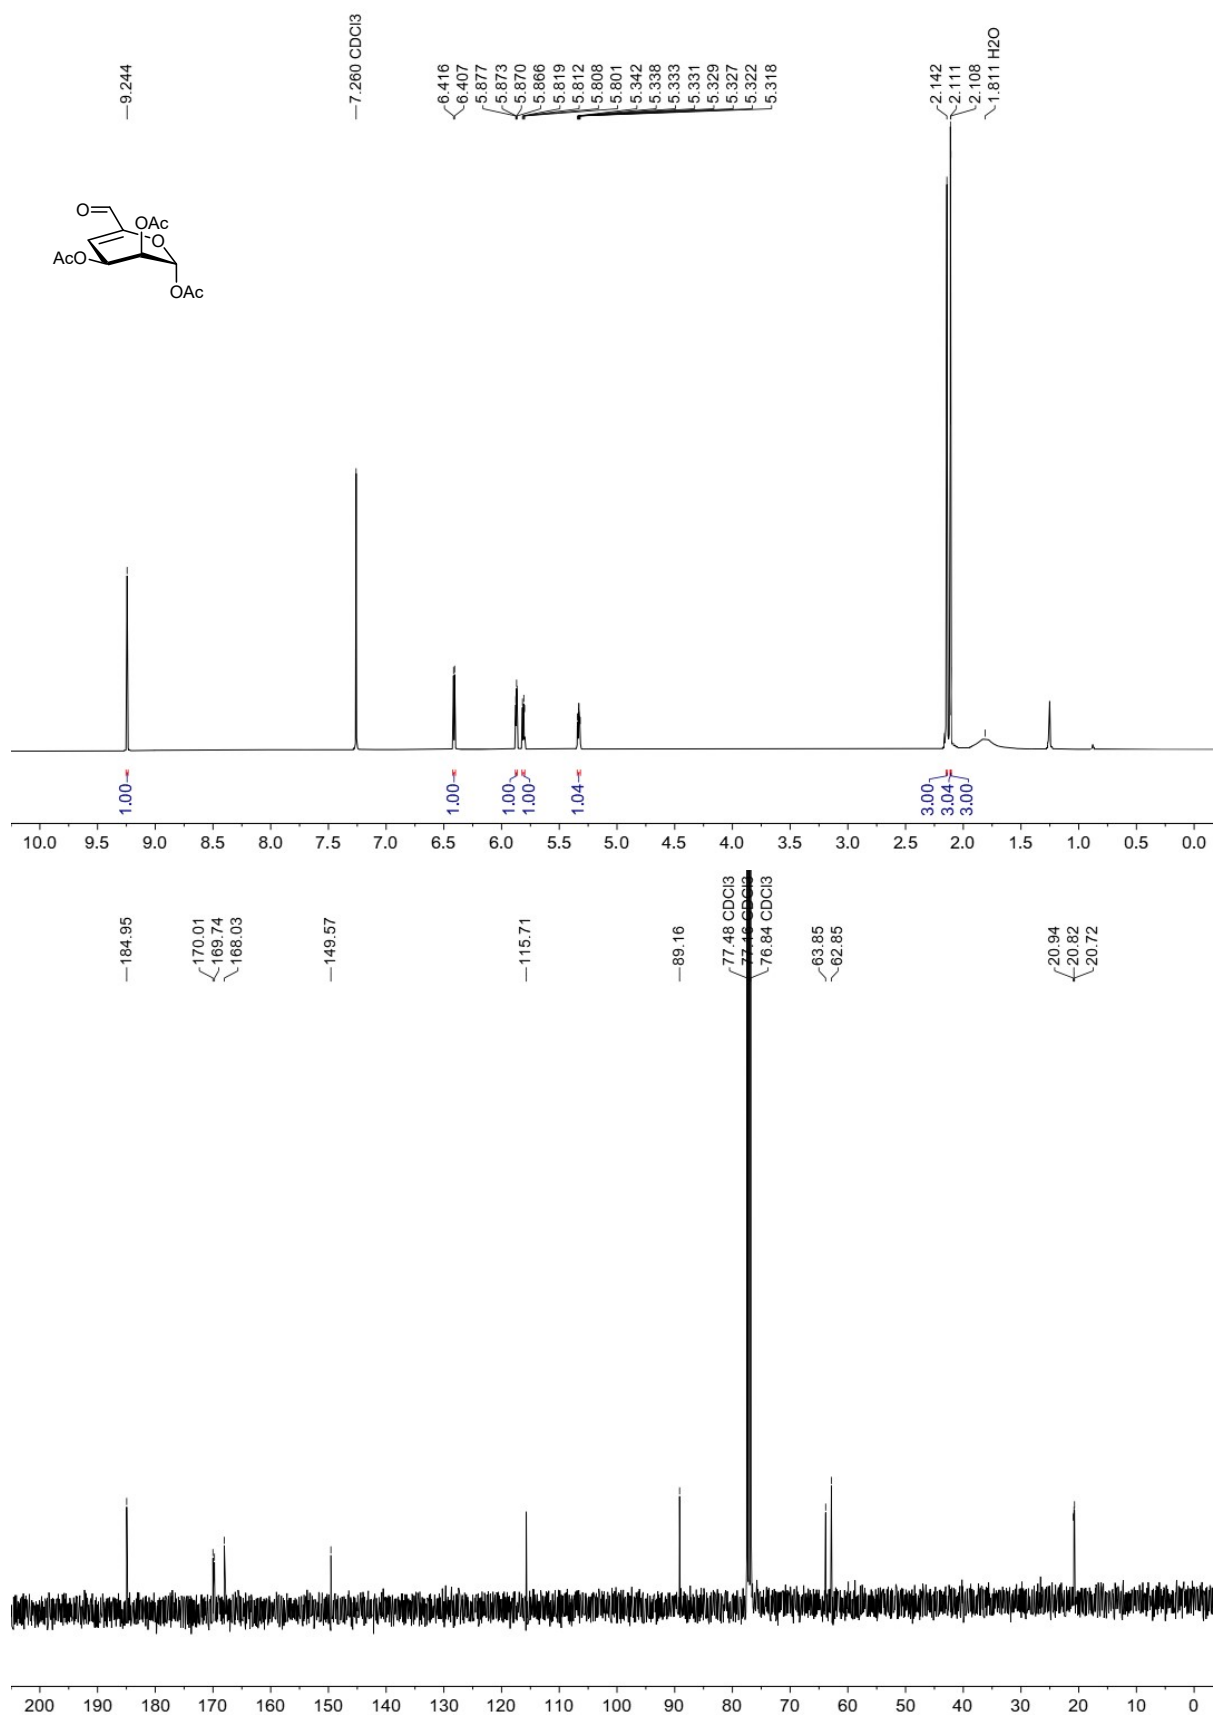

$^1\text{H}$  NMR (400 MHz,  $\text{CDCl}_3$ ) and  $^{13}\text{C}\{^1\text{H}\}$  NMR (101 MHz,  $\text{CDCl}_3$ ) spectra of **7**

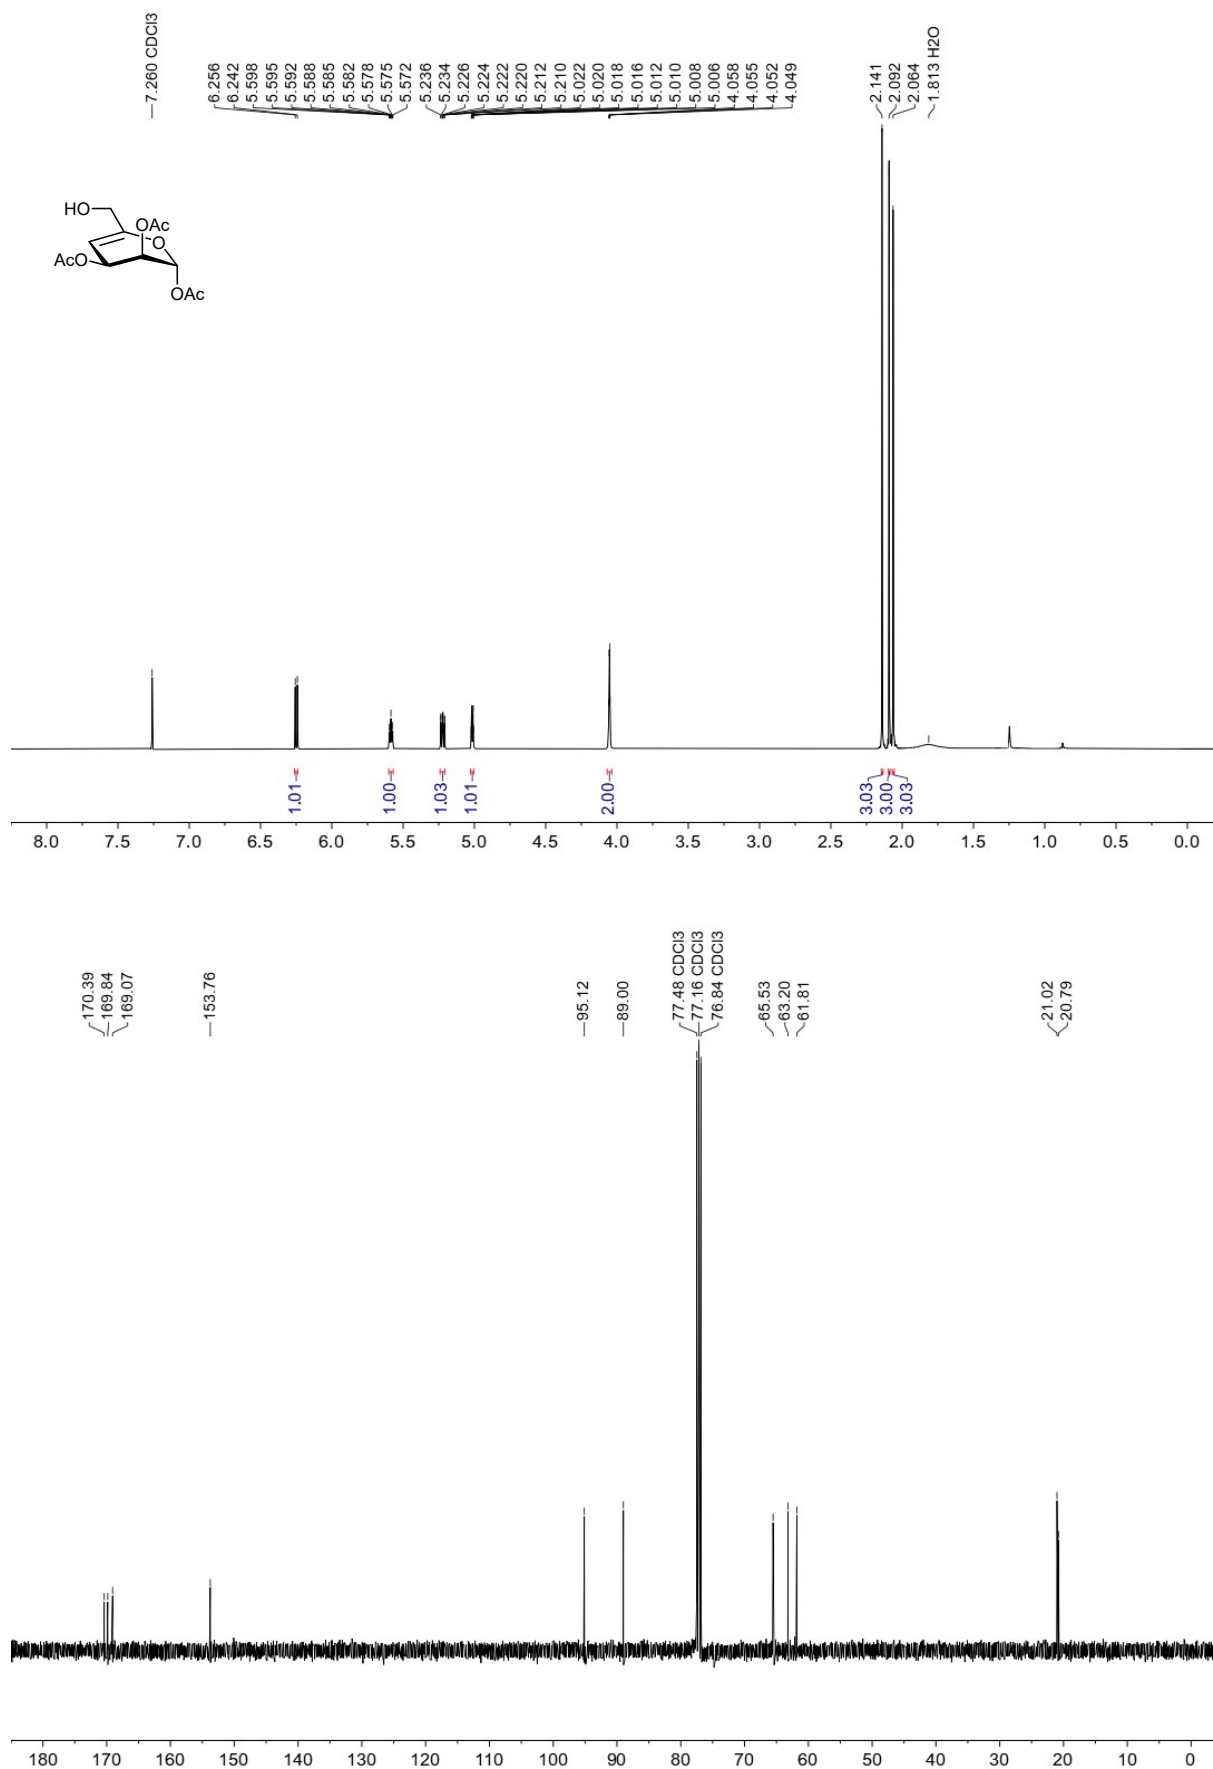

## 4.2. Synthesis of **8**

$^1\text{H}$  NMR (400 MHz,  $\text{CDCl}_3$ ) and  $^{13}\text{C}\{^1\text{H}\}$  NMR (101 MHz,  $\text{CDCl}_3$ ) spectra of **12 $\beta$**

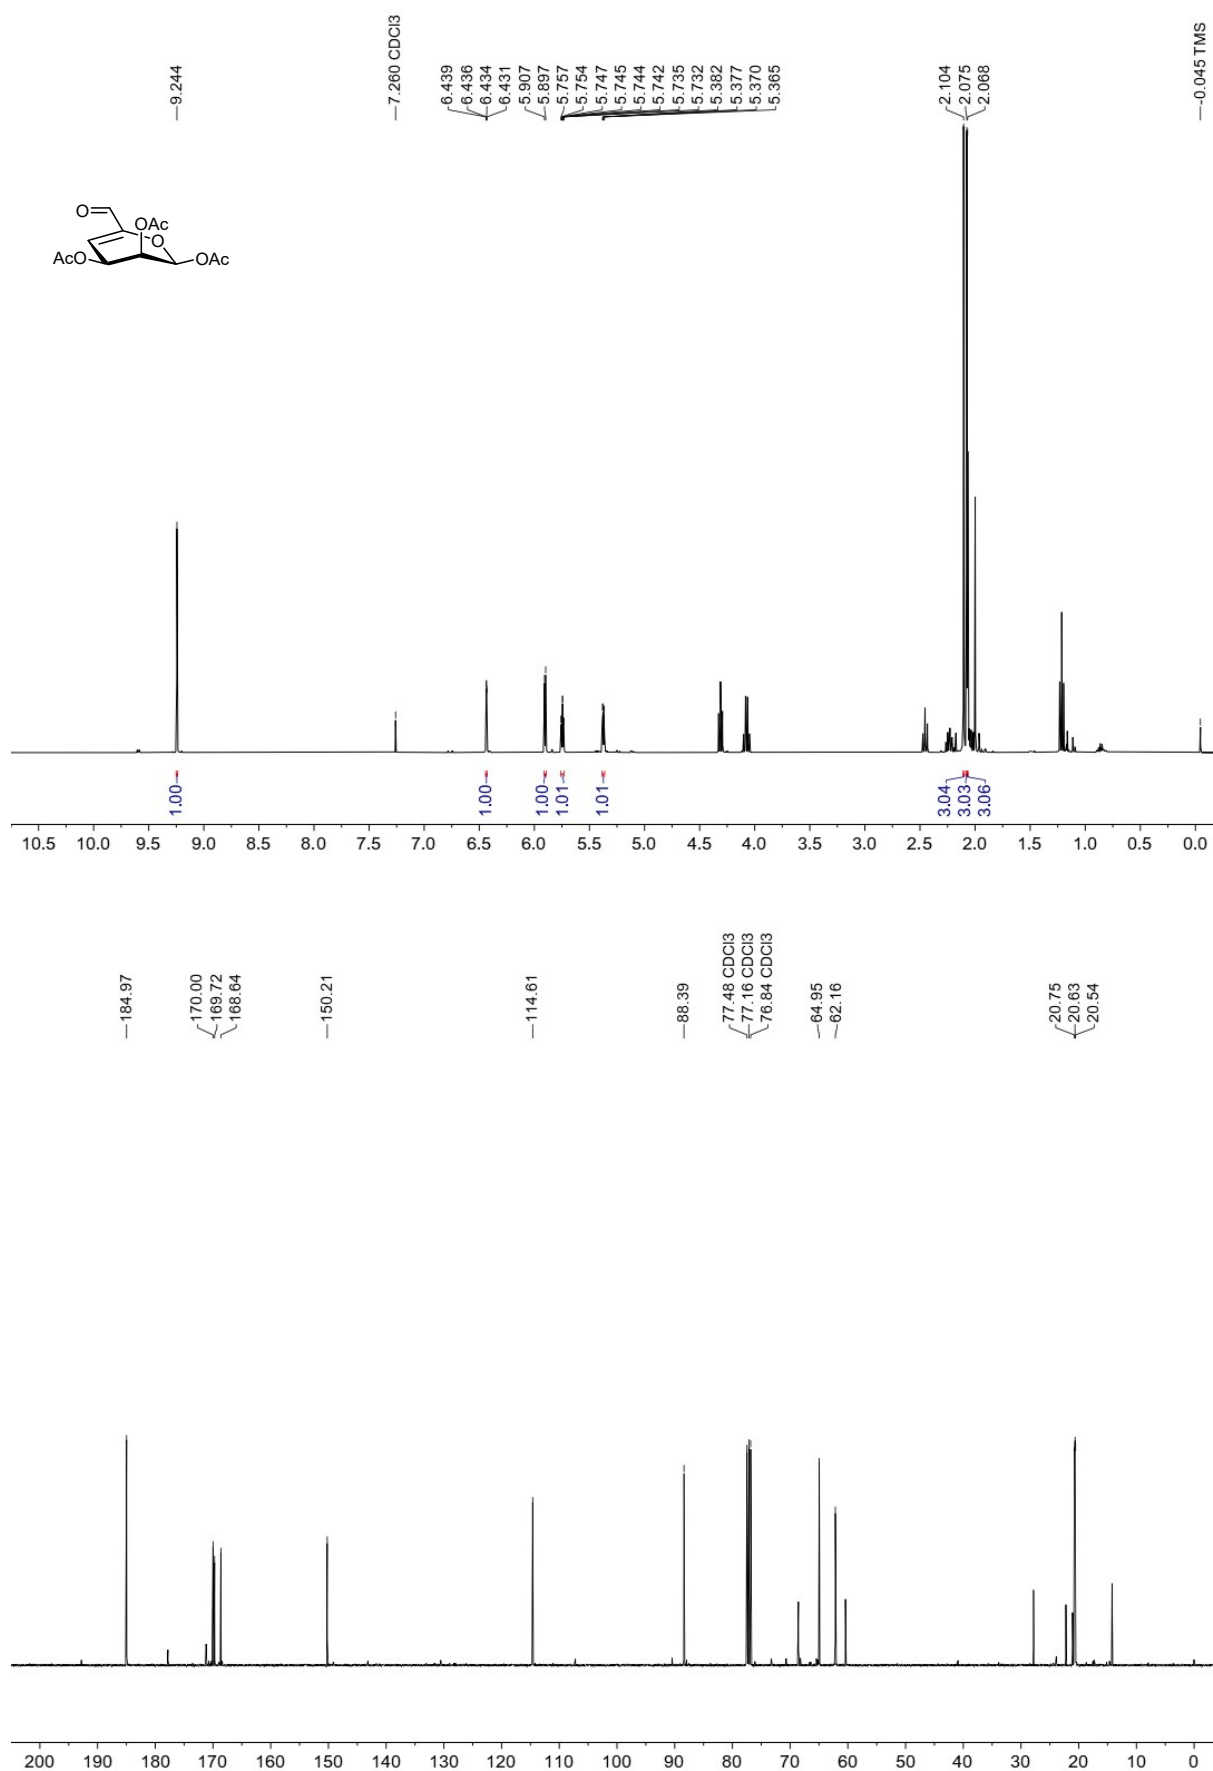

$^1\text{H}$  NMR (400 MHz,  $\text{CDCl}_3$ ) and  $^{13}\text{C}\{^1\text{H}\}$  NMR (101 MHz,  $\text{CDCl}_3$ ) spectra of **13**

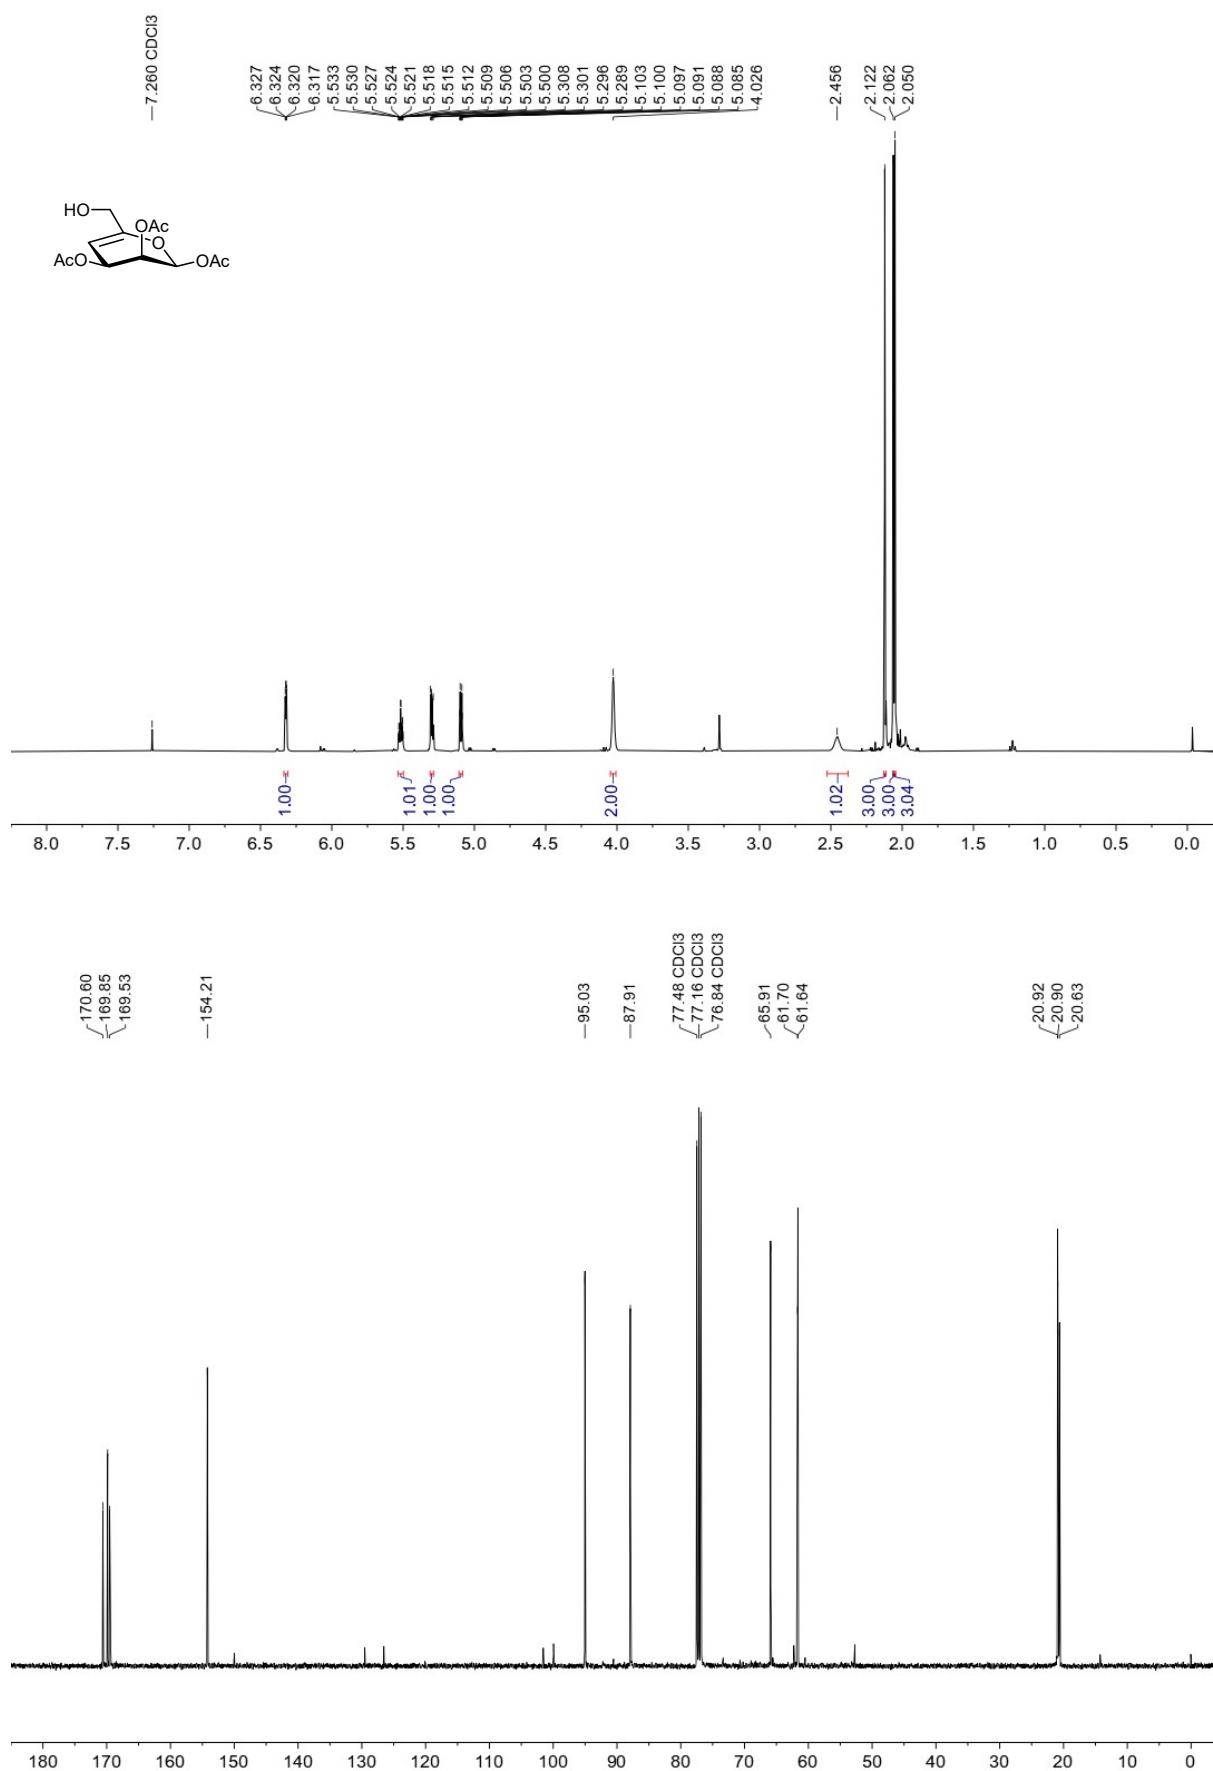



$^1\text{H}$  NMR (400 MHz,  $\text{CDCl}_3$ ) and  $^{13}\text{C}\{^1\text{H}\}$  NMR (101 MHz,  $\text{CDCl}_3$ ) spectra of **8**

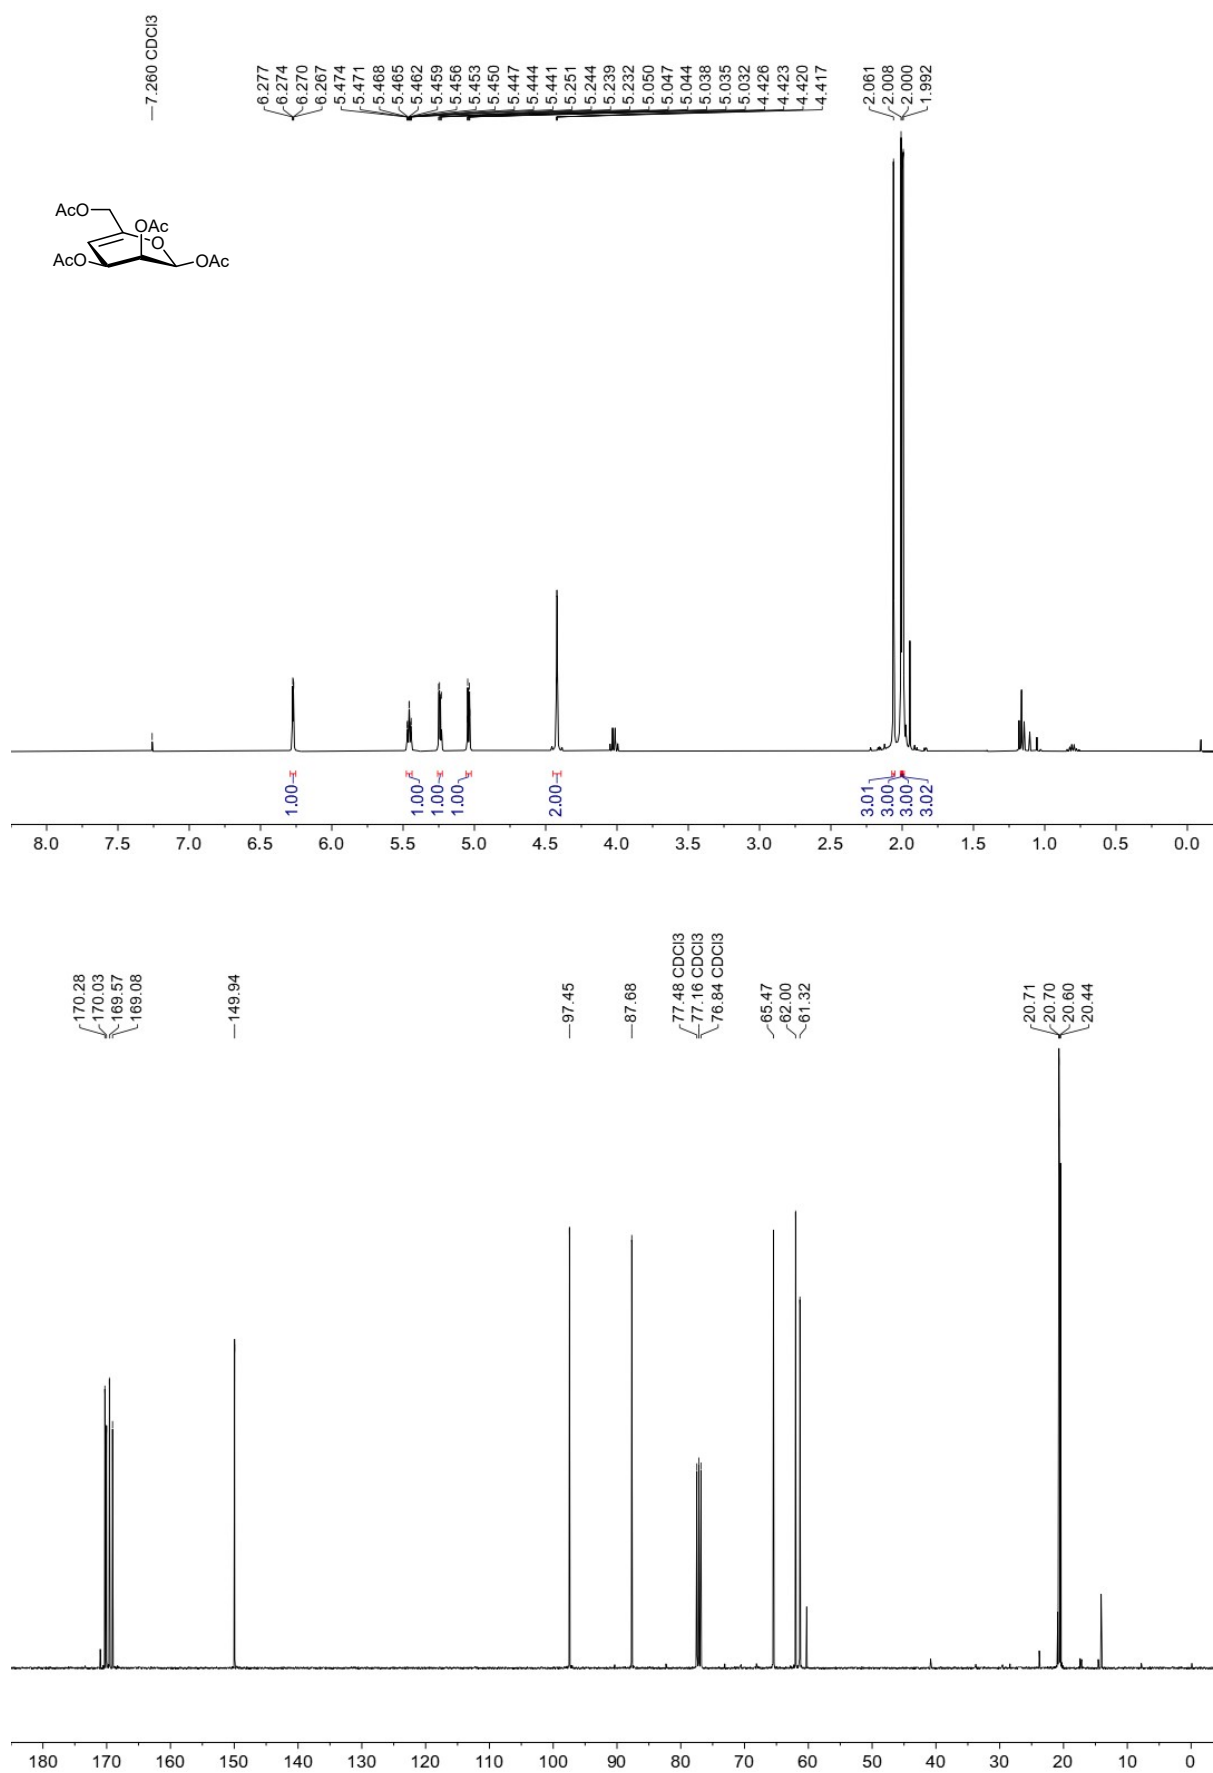

### 4.3. Synthesis of **9**

$^1\text{H}$  NMR (400 MHz,  $\text{CDCl}_3$ ) and  $^{13}\text{C}\{^1\text{H}\}$  NMR (101 MHz,  $\text{CDCl}_3$ ) spectra of **9**

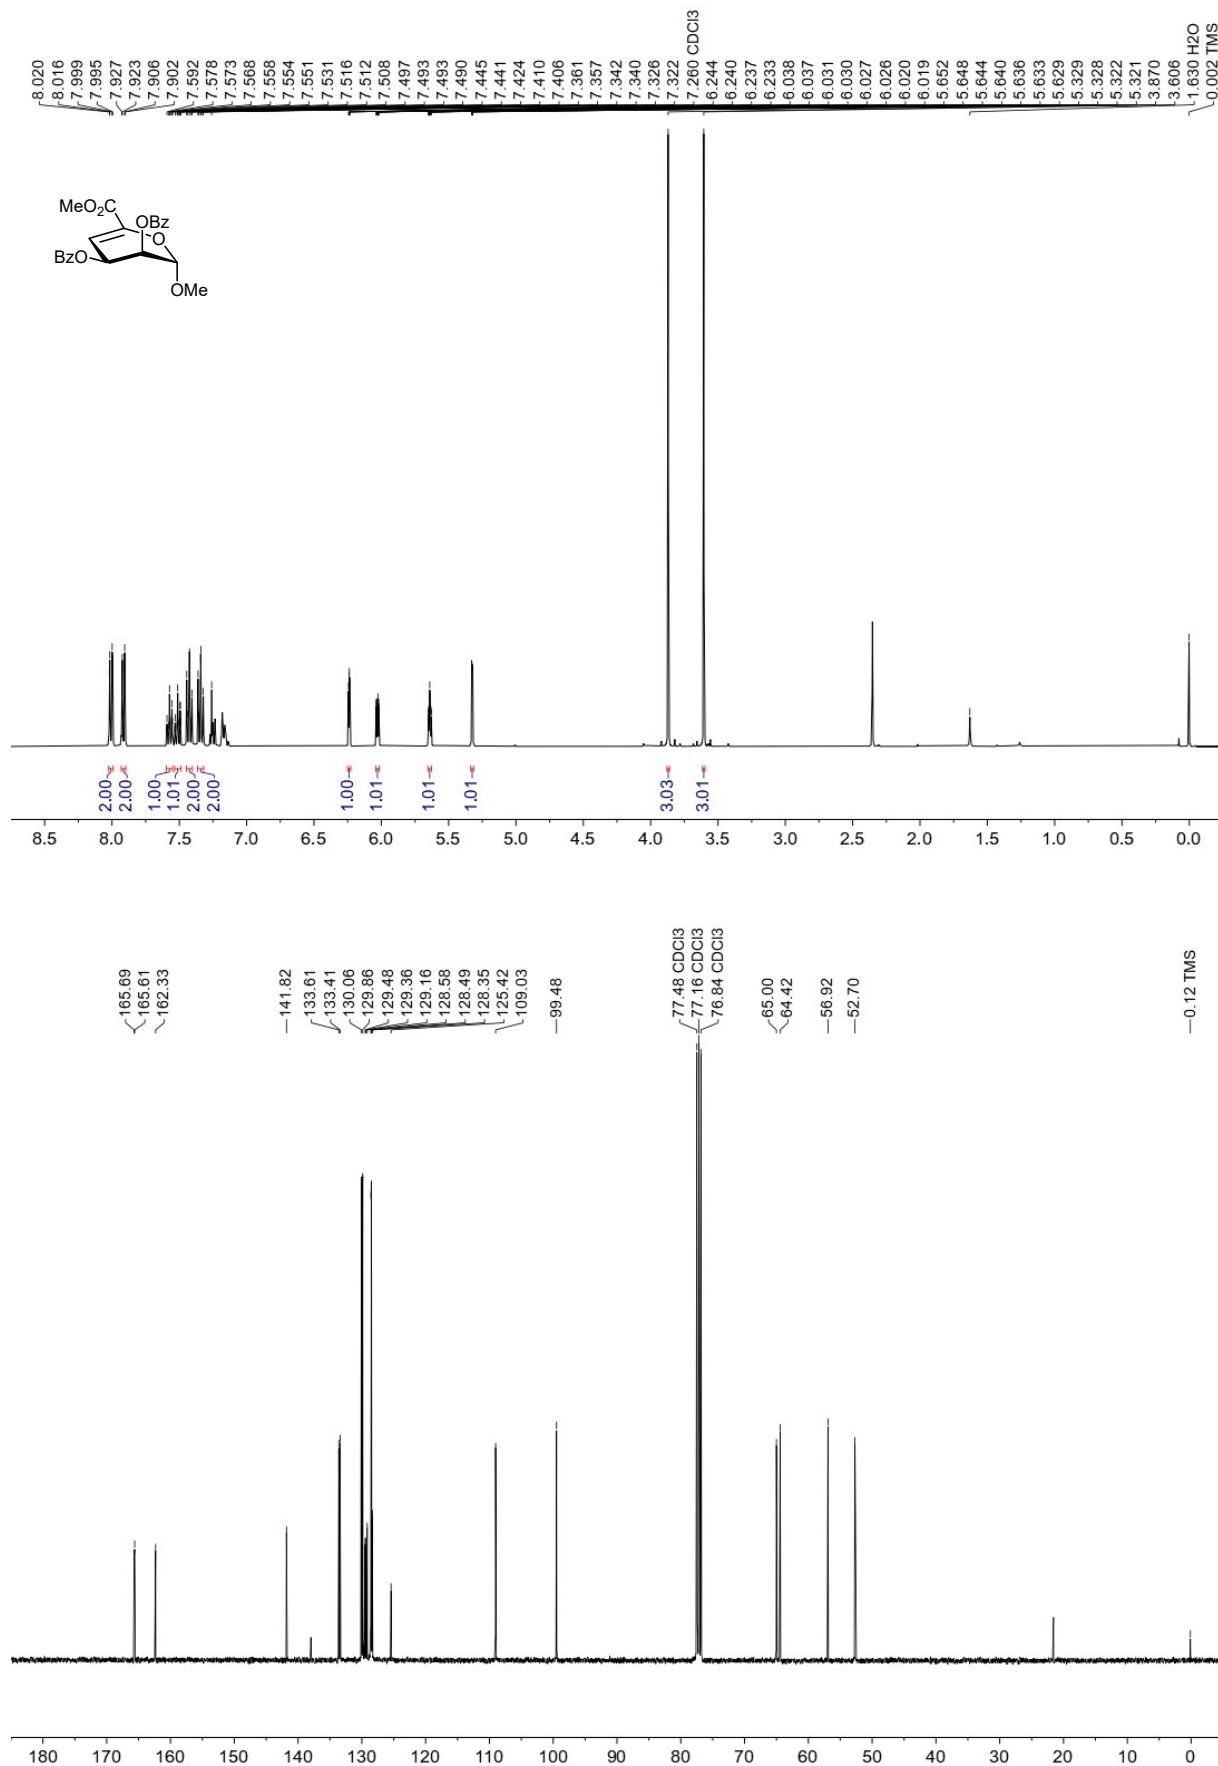

#### 4.4. Synthesis of 10

$^1\text{H}$  NMR (400 MHz,  $\text{CDCl}_3$ ) and  $^{13}\text{C}\{^1\text{H}\}$  NMR (101 MHz,  $\text{CDCl}_3$ ) spectra of 17

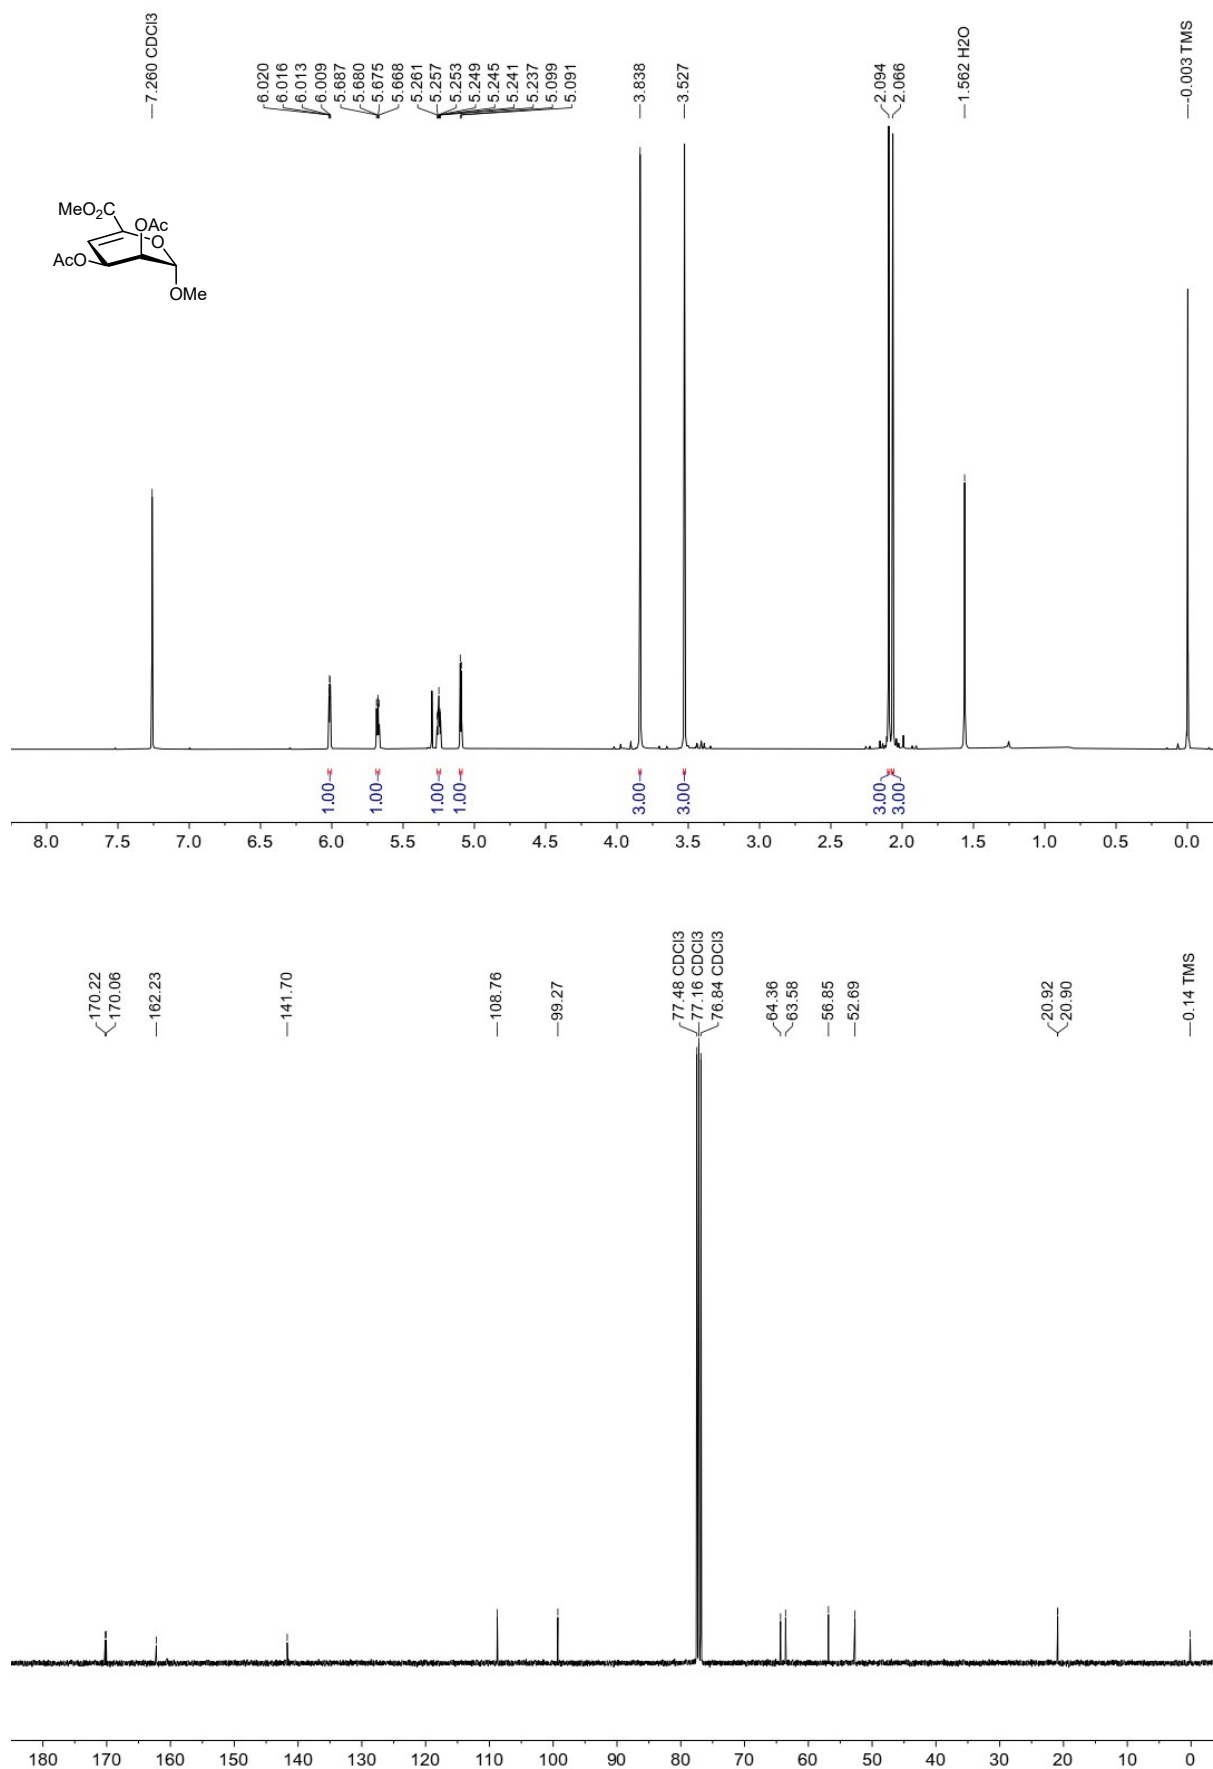

$^1\text{H}$  NMR (400 MHz,  $\text{D}_2\text{O}$ ) and  $^{13}\text{C}\{^1\text{H}\}$  NMR (101 MHz,  $\text{D}_2\text{O}$ ) spectra of **10**

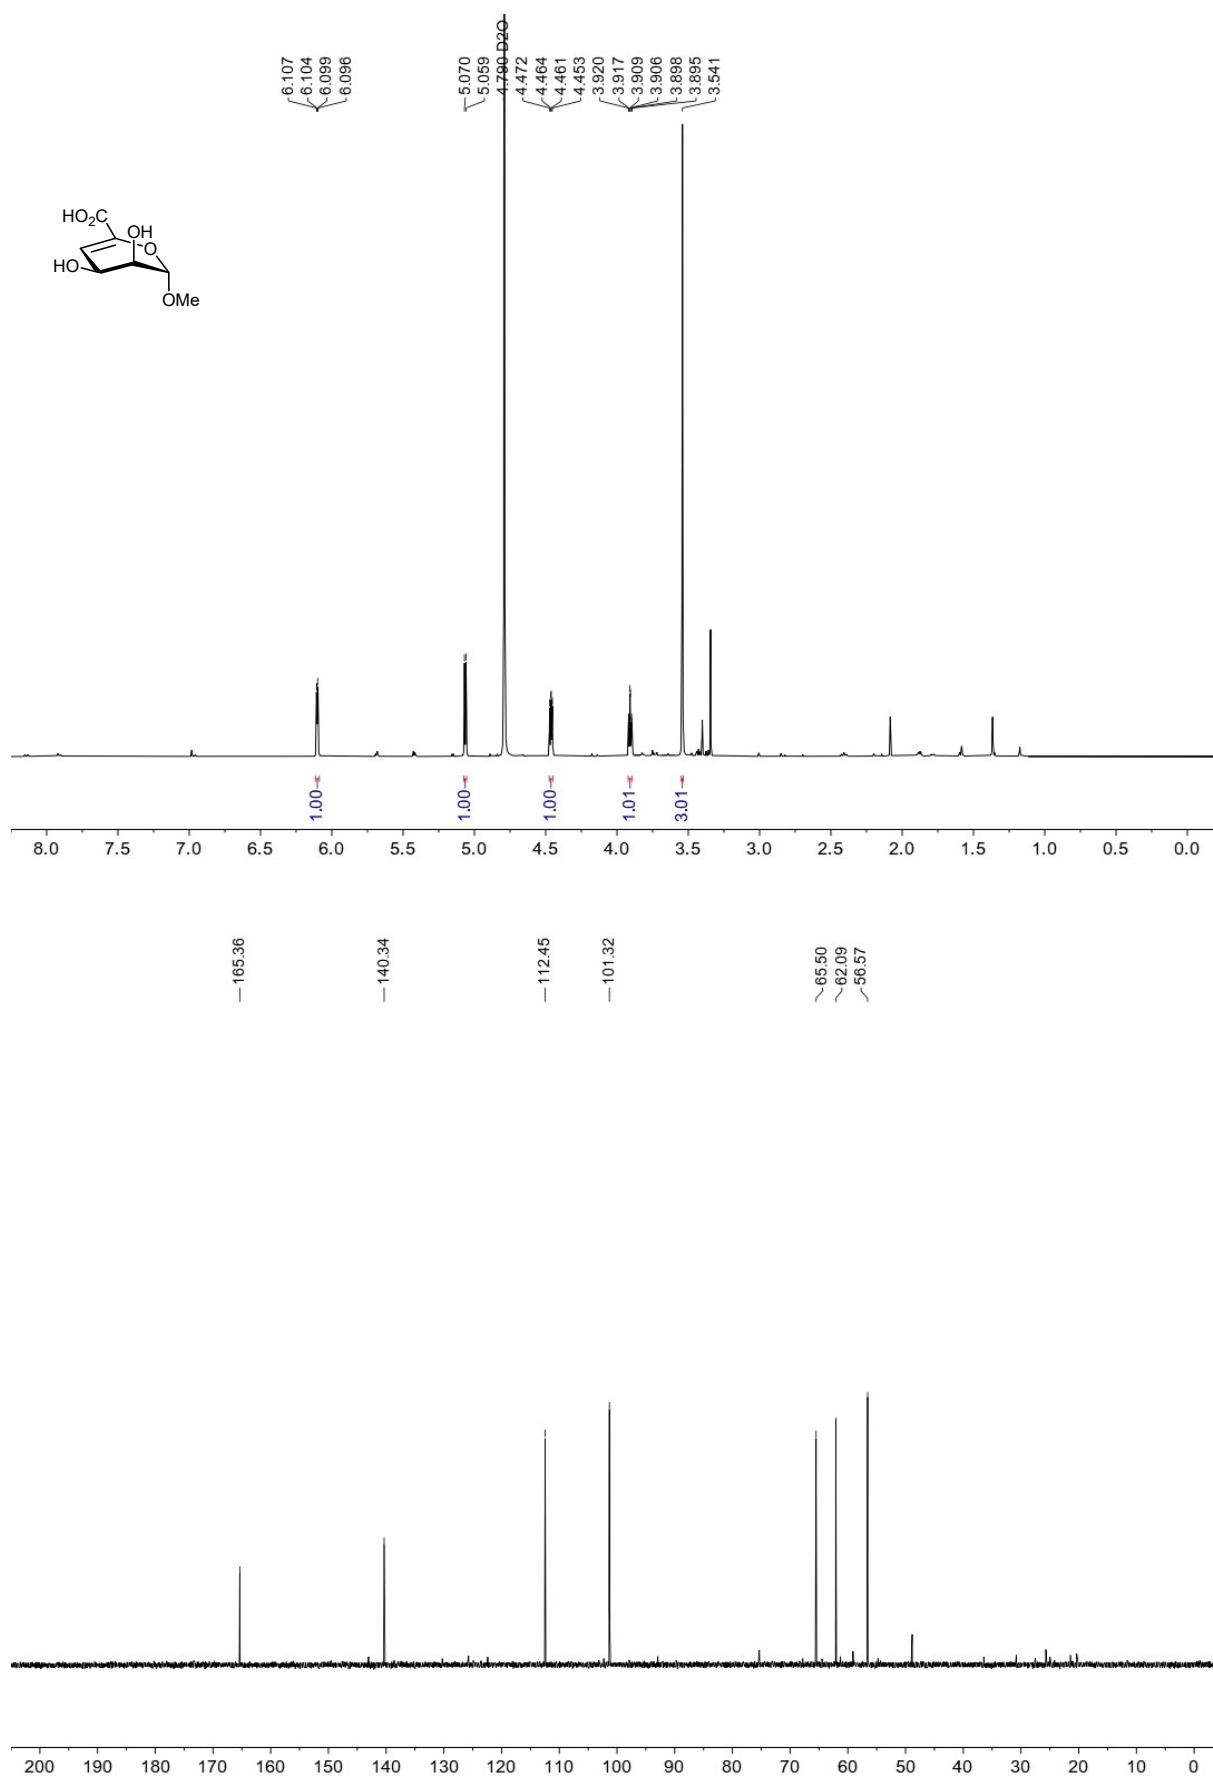

## 5. Thiol-ene reactions on 4,5-glycals 7-10

$^1\text{H}$  NMR (400 MHz,  $\text{CDCl}_3$ ) and  $^{13}\text{C}\{^1\text{H}\}$  NMR (101 MHz,  $\text{CDCl}_3$ ) spectra of **18**

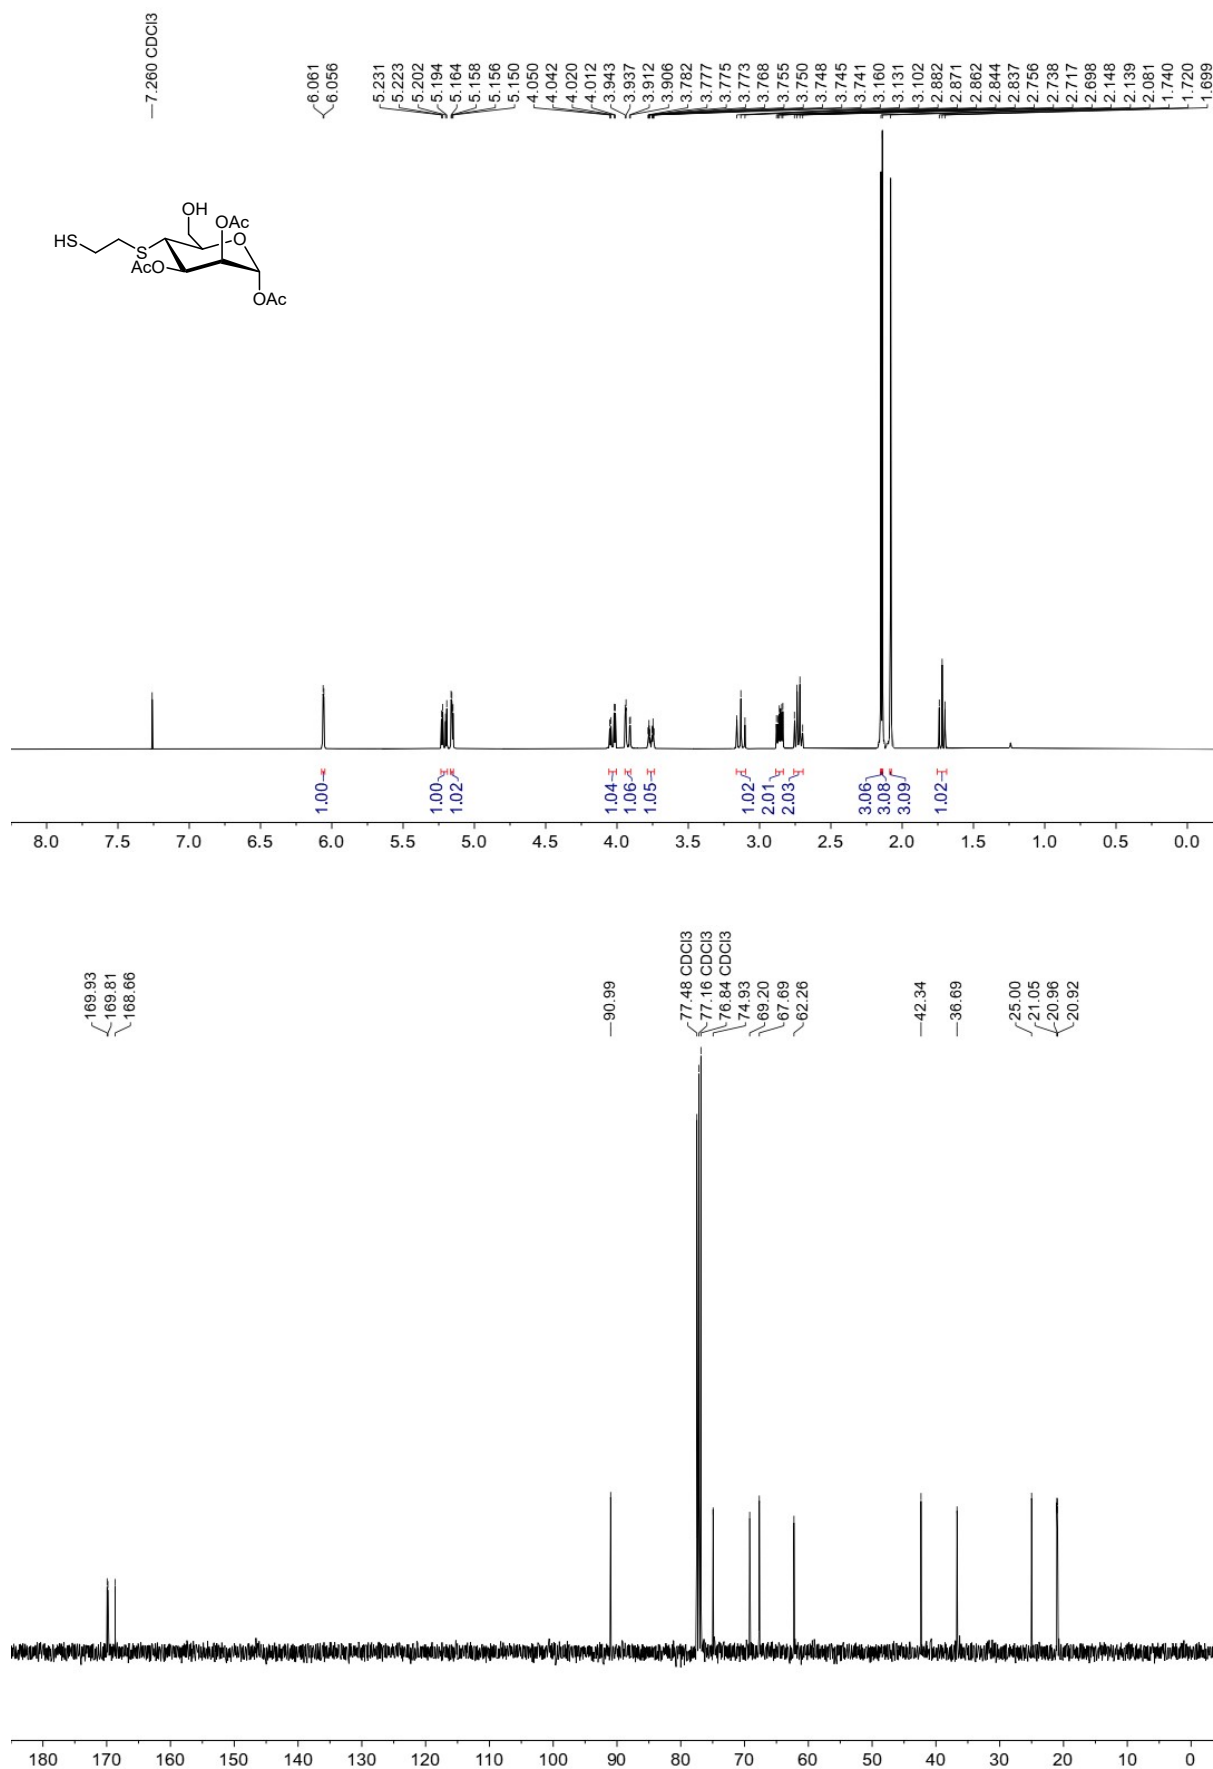

$^1\text{H}$  NMR (400 MHz,  $\text{CDCl}_3$ ) and  $^{13}\text{C}\{^1\text{H}\}$  NMR (101 MHz,  $\text{CDCl}_3$ ) spectra of **19**

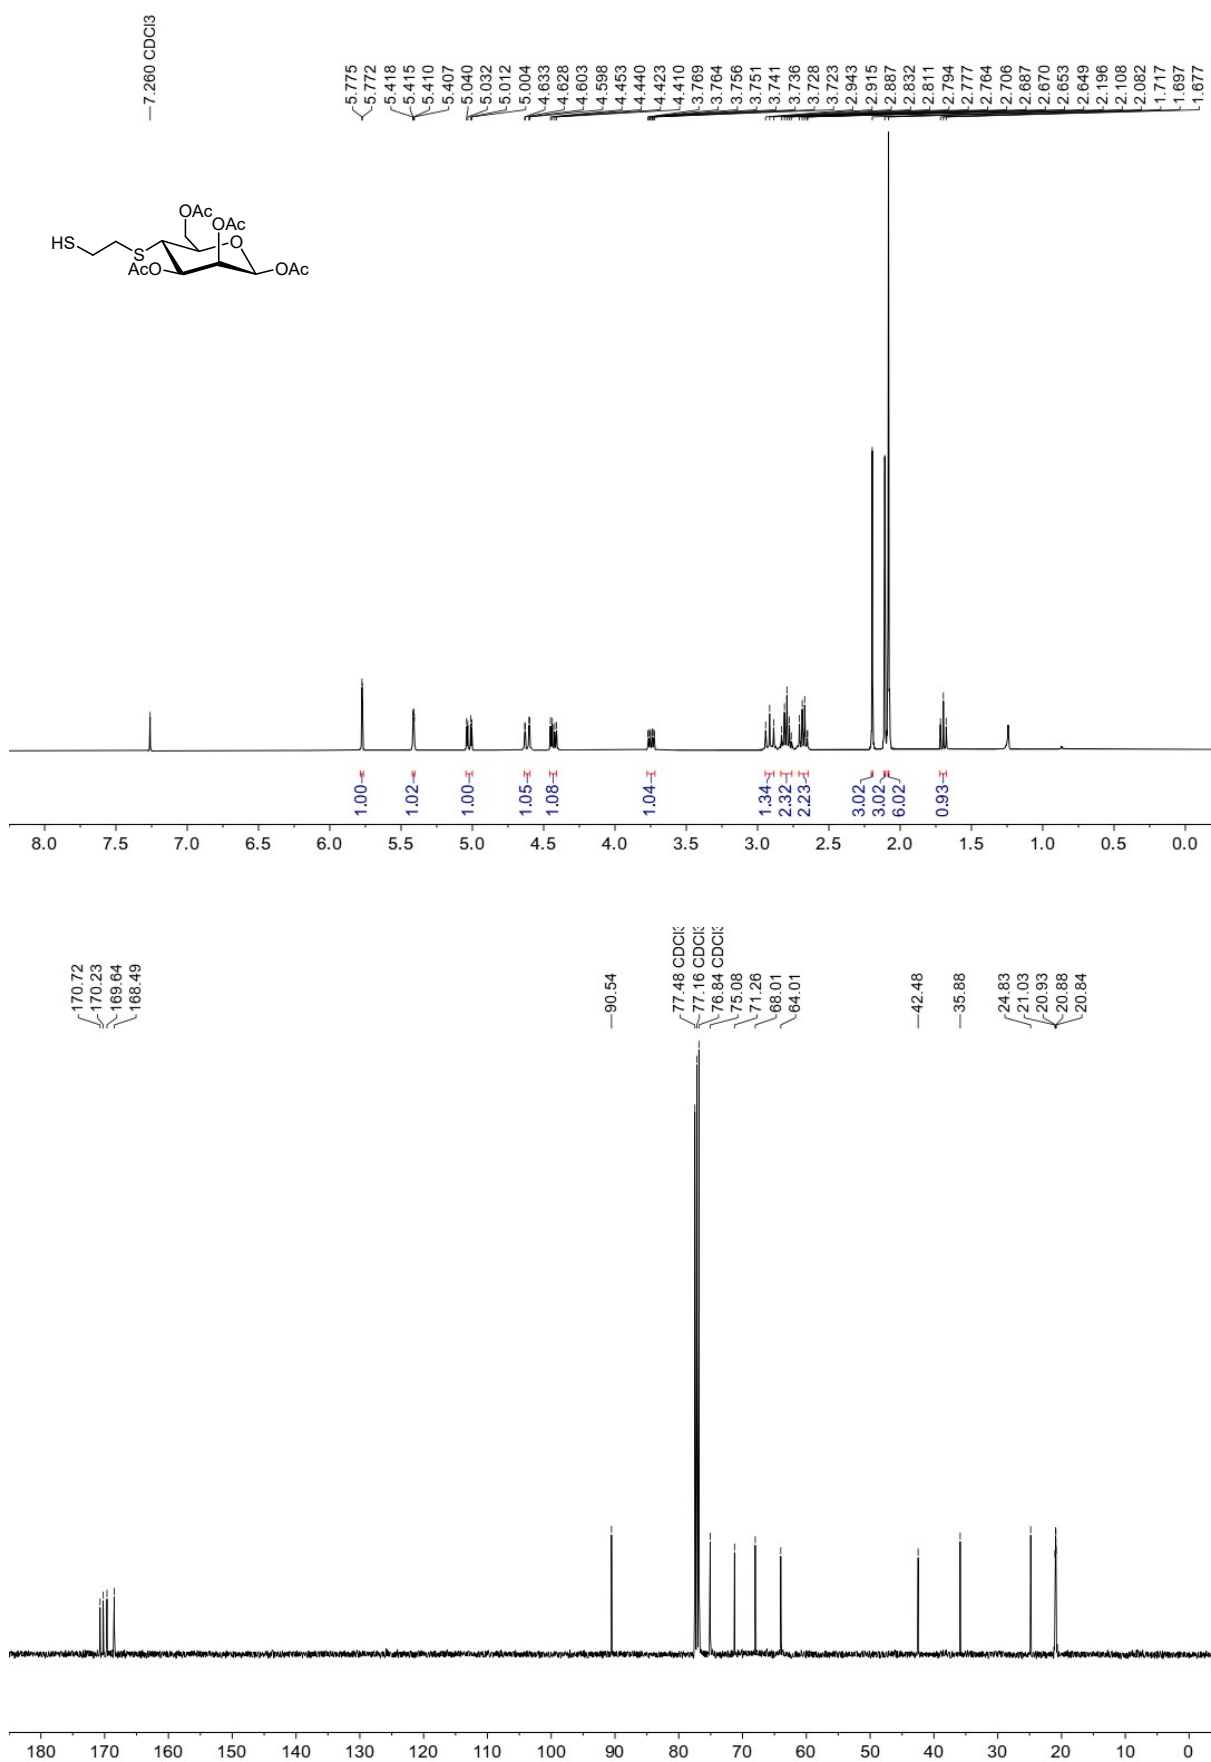

$^1\text{H}$  NMR (400 MHz,  $\text{CDCl}_3$ ) and  $^{13}\text{C}\{^1\text{H}\}$  NMR (101 MHz,  $\text{CDCl}_3$ ) spectra of **20a**

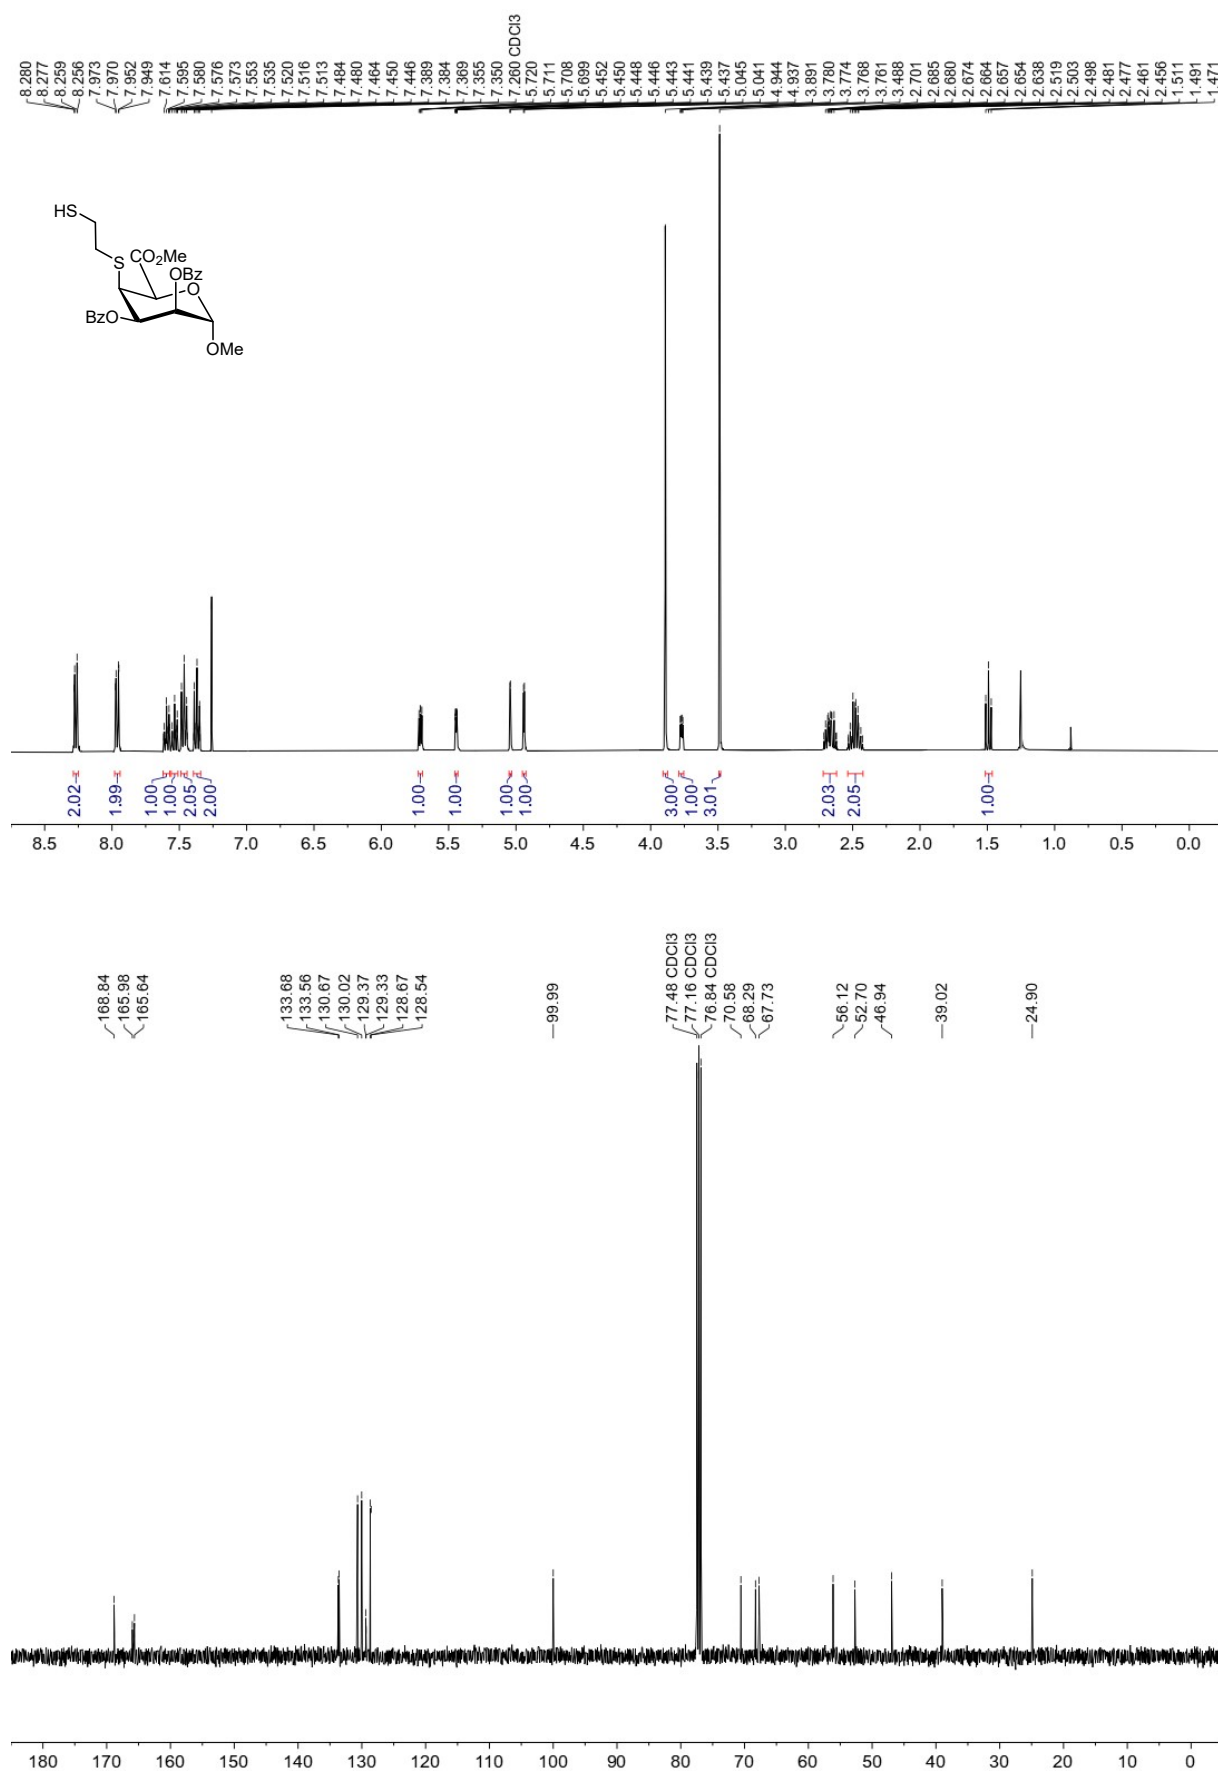

$^1\text{H}$  NMR (400 MHz,  $\text{CDCl}_3$ ) and  $^{13}\text{C}\{^1\text{H}\}$  NMR (101 MHz,  $\text{CDCl}_3$ ) spectra of **20b**

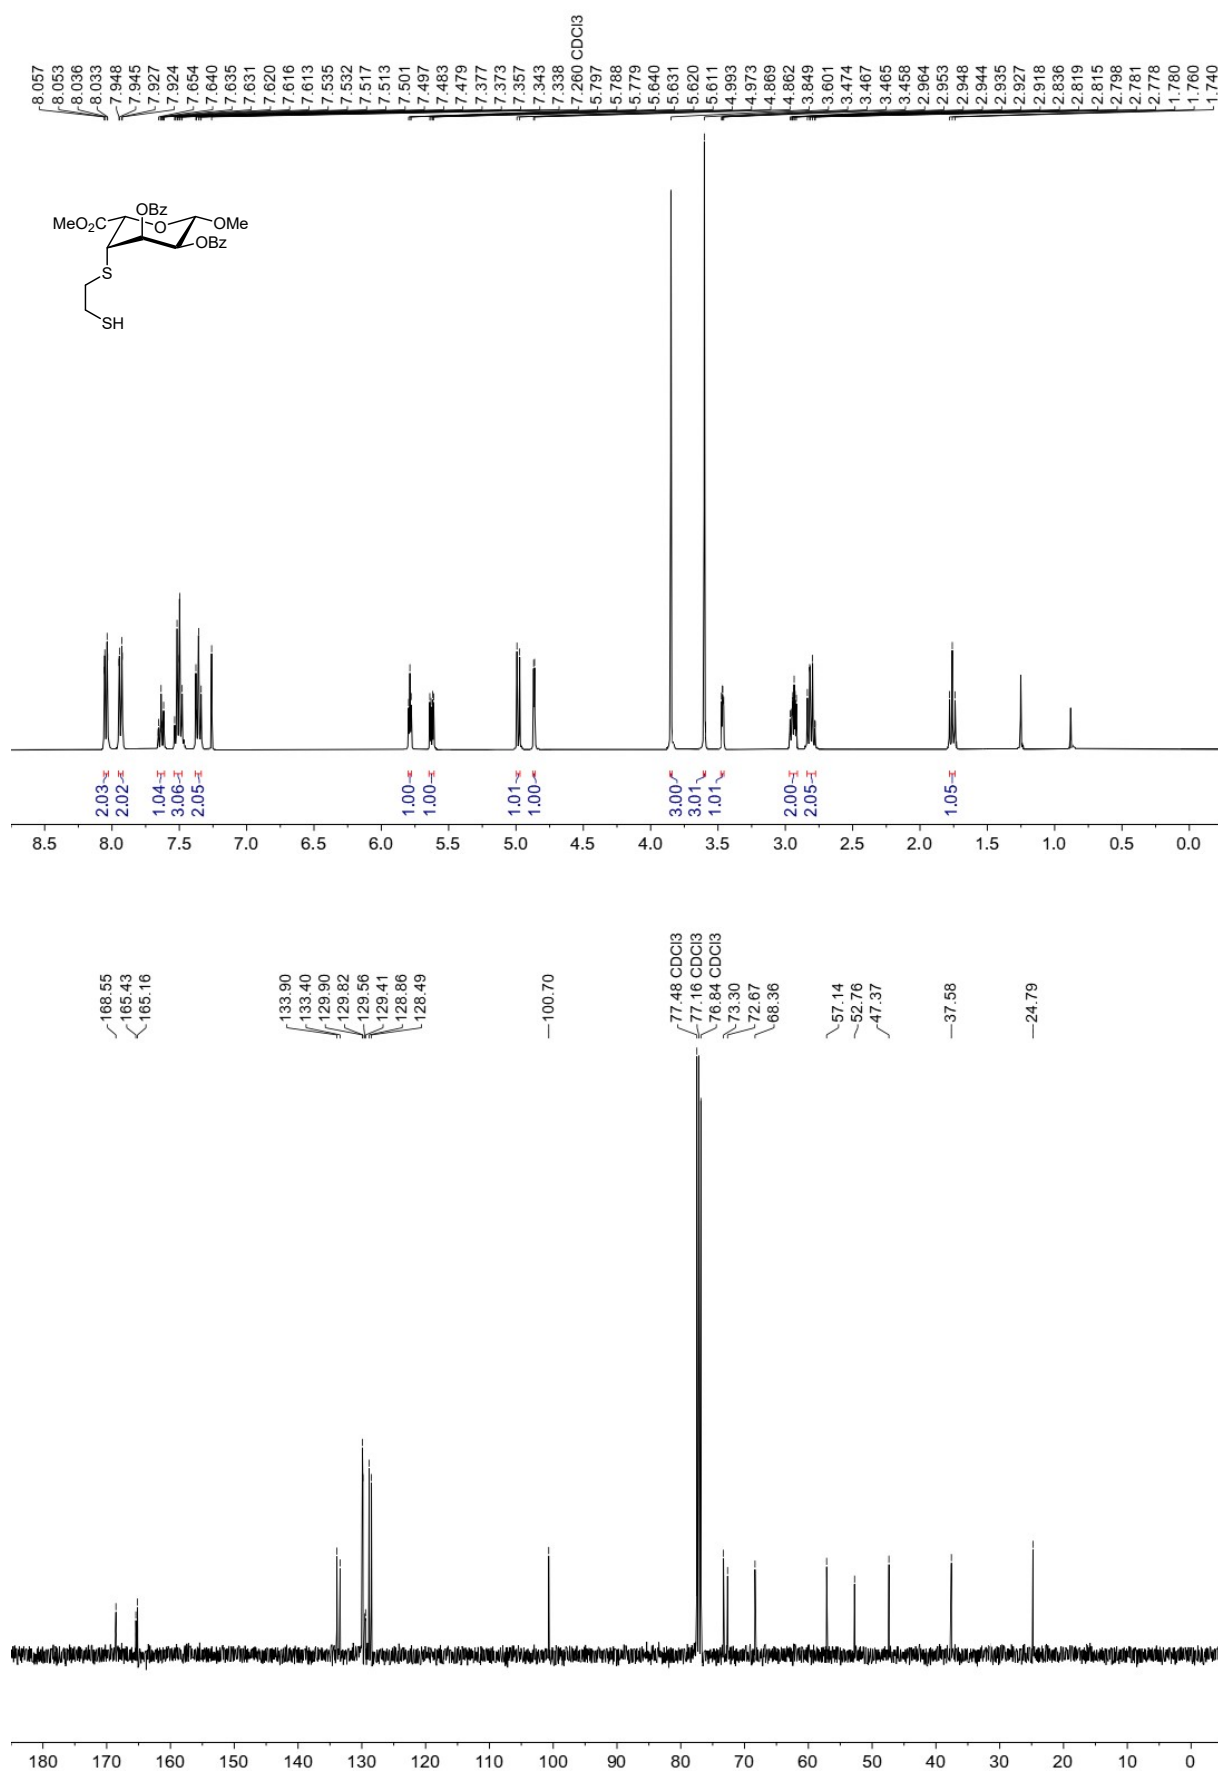



$^1\text{H}$  NMR (400 MHz,  $\text{CD}_3\text{OD}$ ) and  $^{13}\text{C}\{^1\text{H}\}$  NMR (101 MHz,  $\text{CD}_3\text{OD}$ ) spectra of **21**

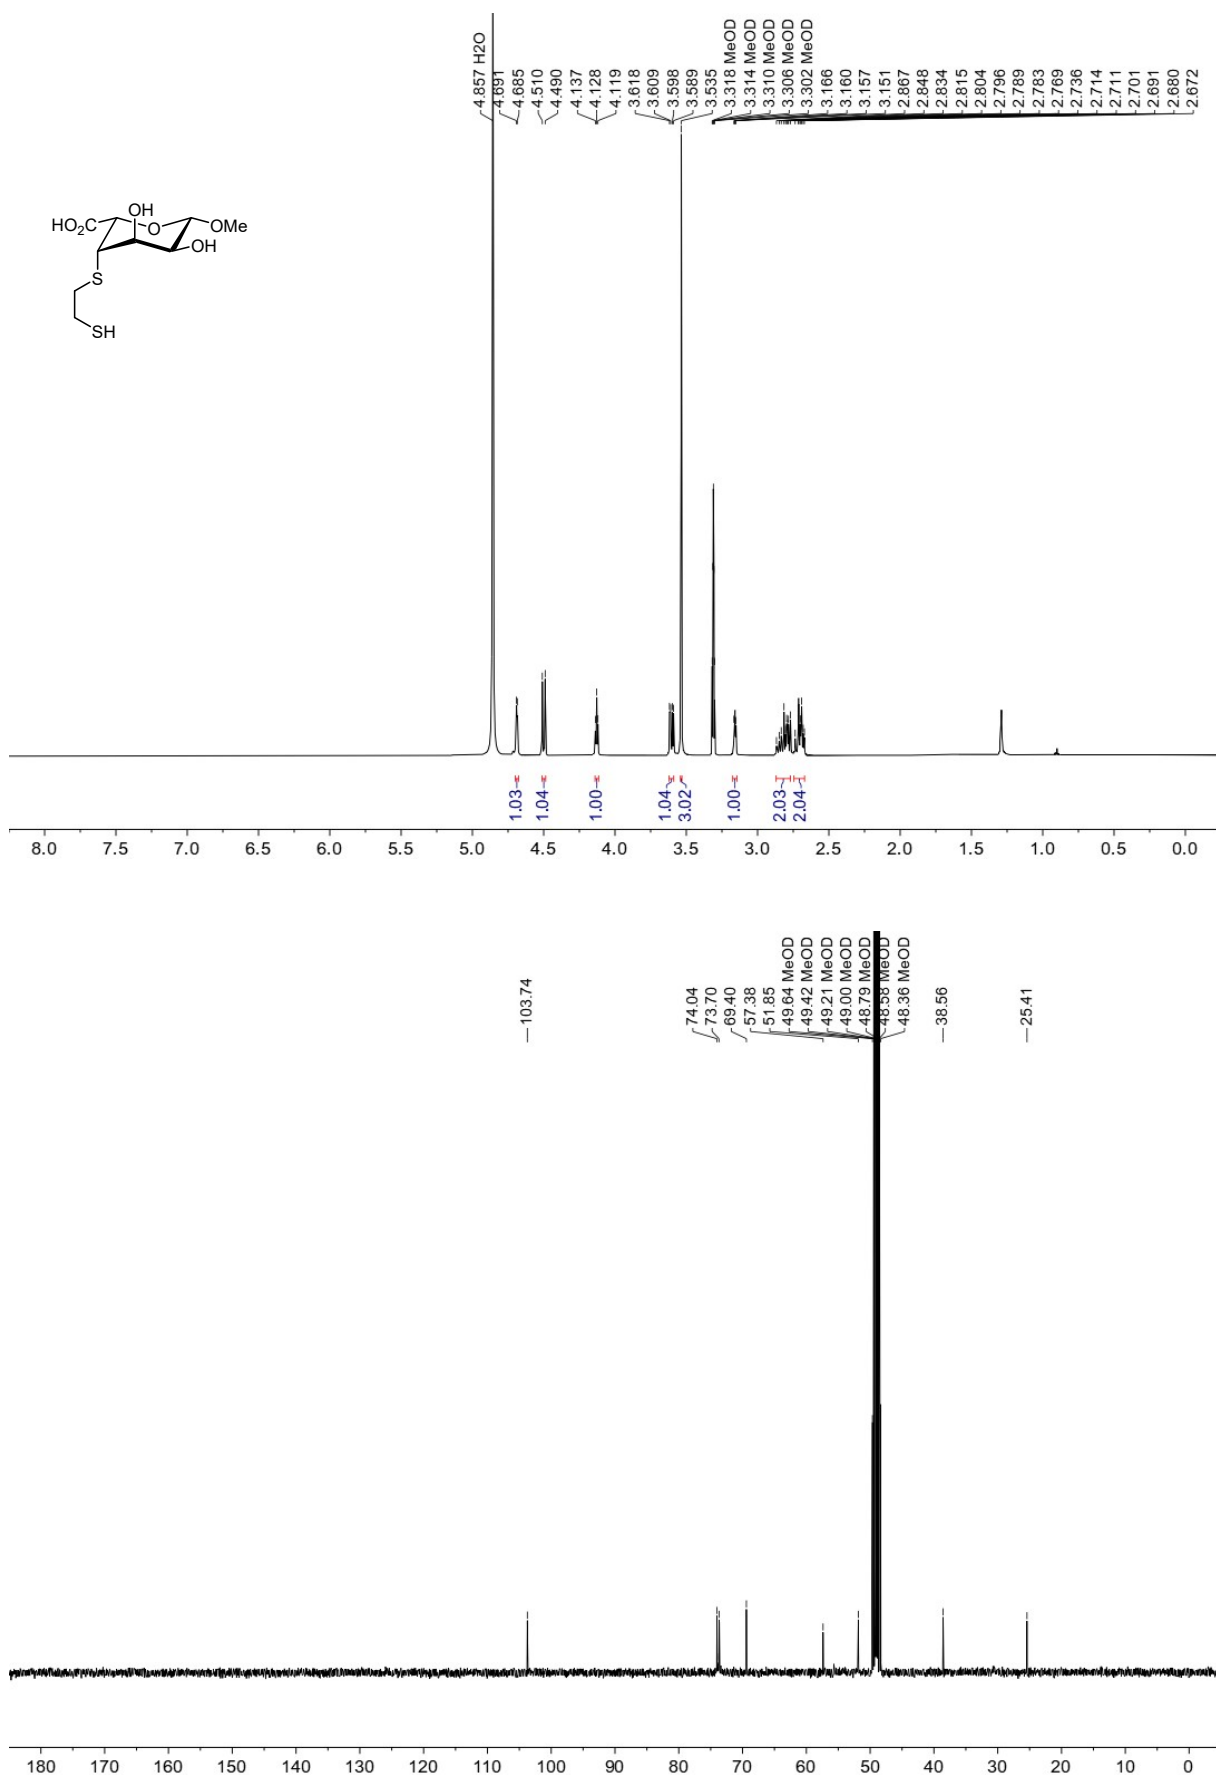

## 6. Synthesis of disaccharide **22** and thiol-ene reaction

### 6.1. Synthesis of disaccharide **22**

$^1\text{H}$  NMR (400 MHz,  $\text{CDCl}_3$ ) and  $^{13}\text{C}\{^1\text{H}\}$  NMR (101 MHz,  $\text{CDCl}_3$ ) spectra of **24**

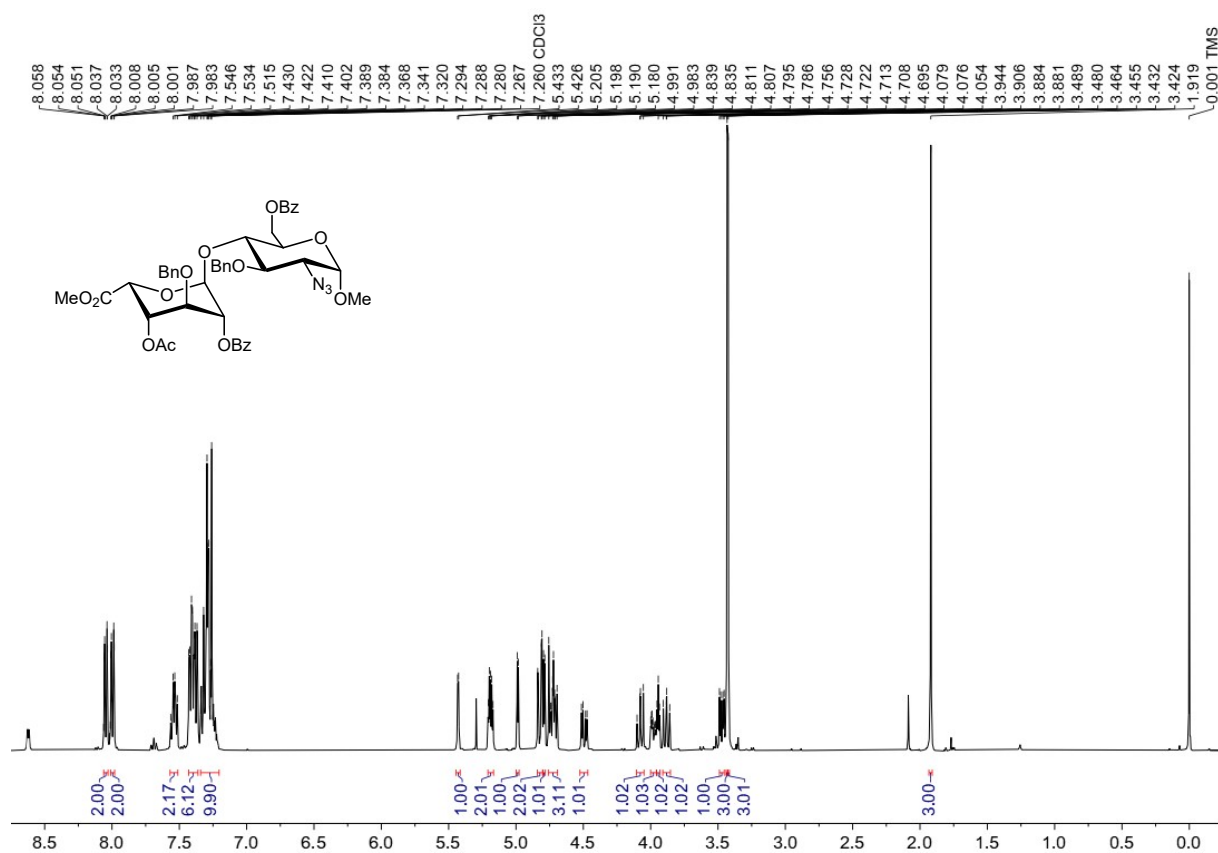

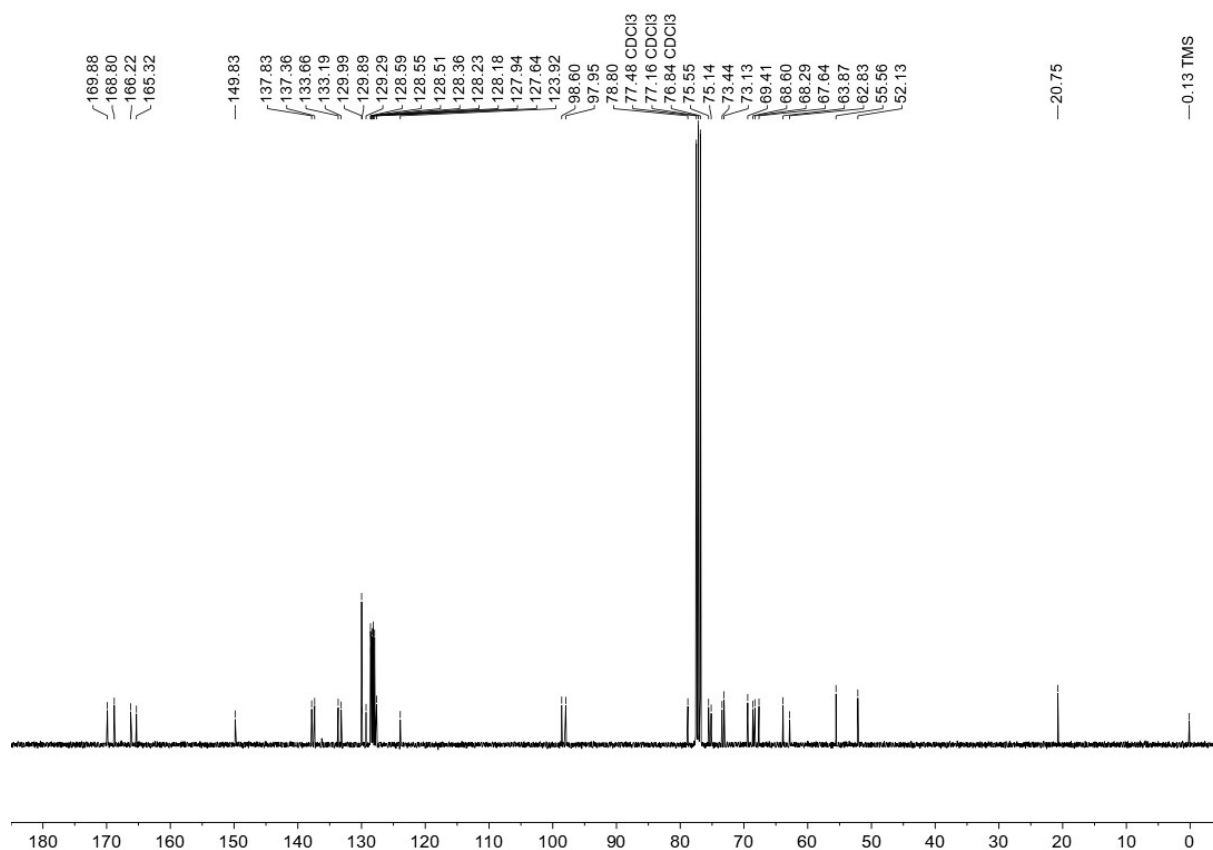

<sup>1</sup>H NMR (400 MHz, CDCl<sub>3</sub>) magnified spectra of **24**

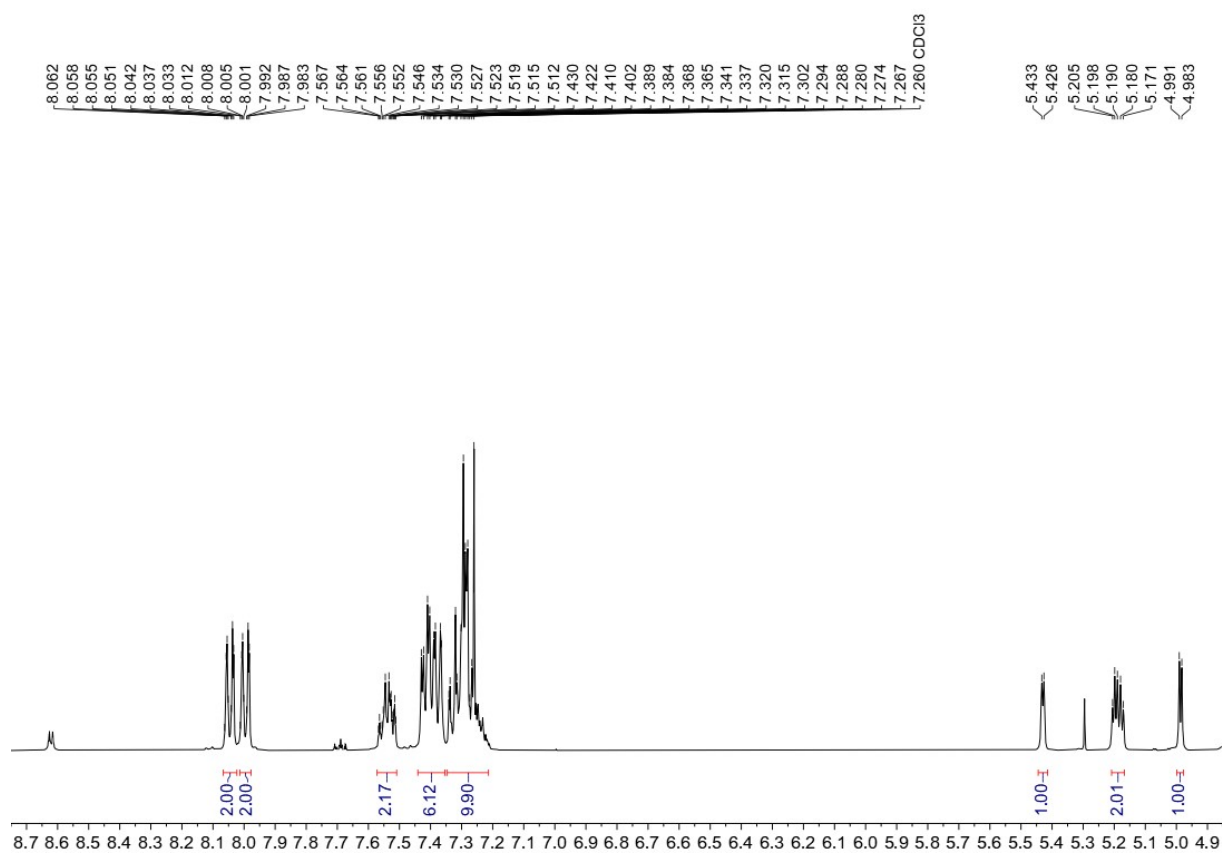

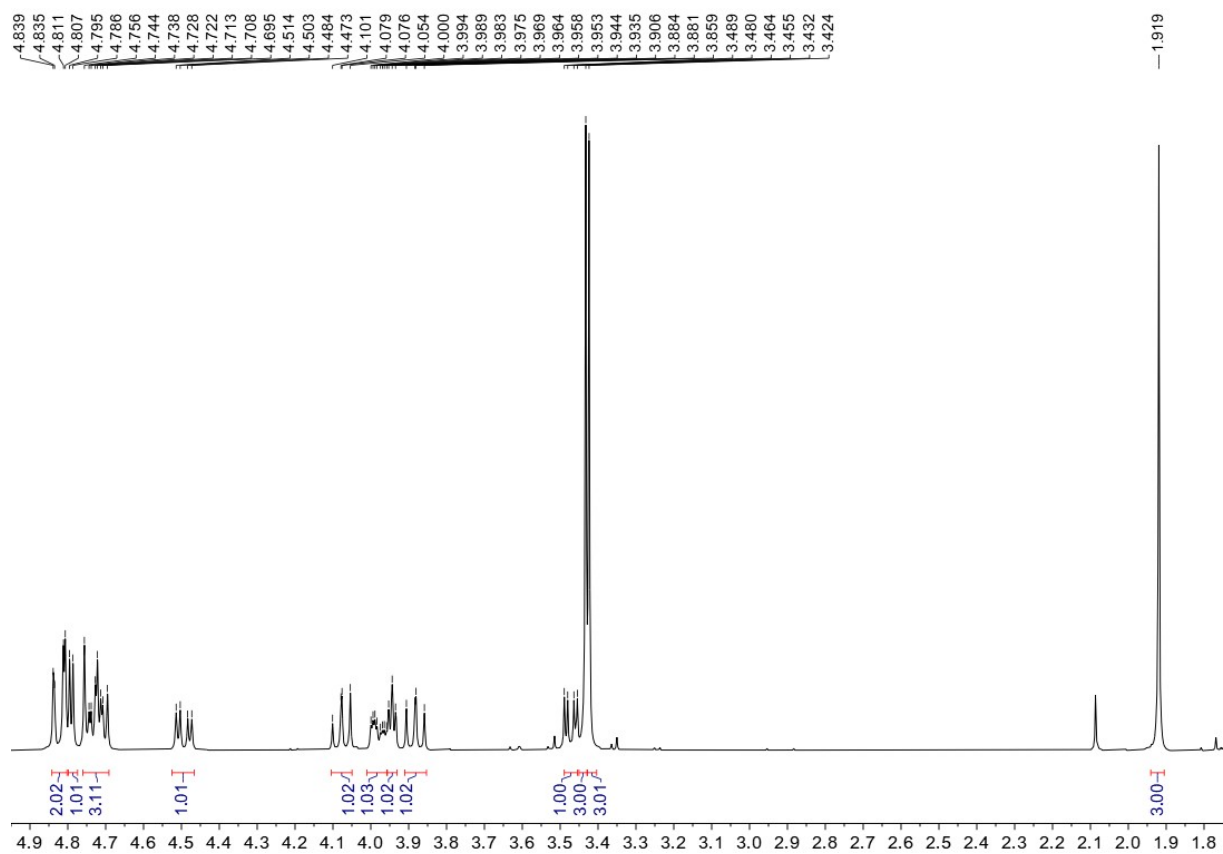

2D  $^1\text{H}$ ,  $^1\text{H}$ -COSY (400 MHz,  $\text{CDCl}_3$ ) spectra of **24**

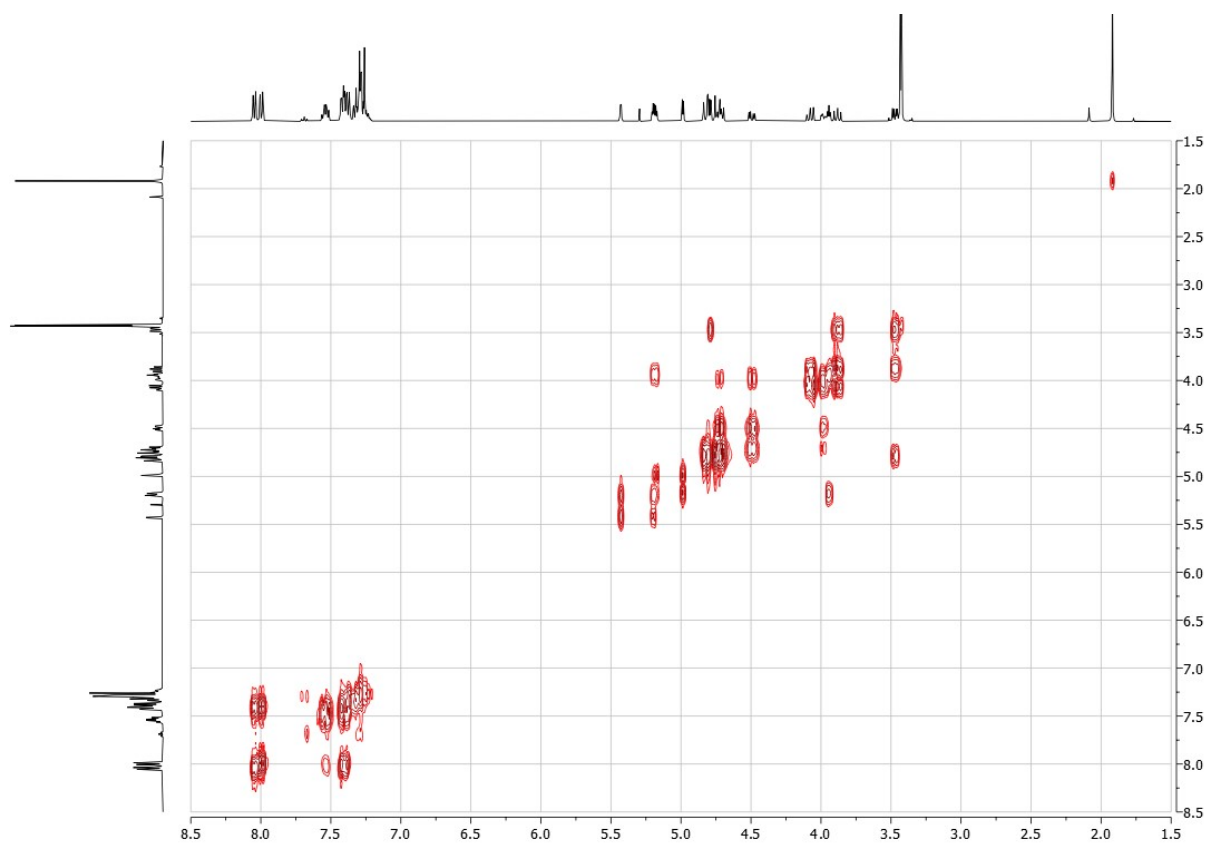

2D  $^1\text{H}$ ,  $^{13}\text{C}$ -HSQC (400 MHz x 101 MHz,  $\text{CDCl}_3$ ) spectra of **24**

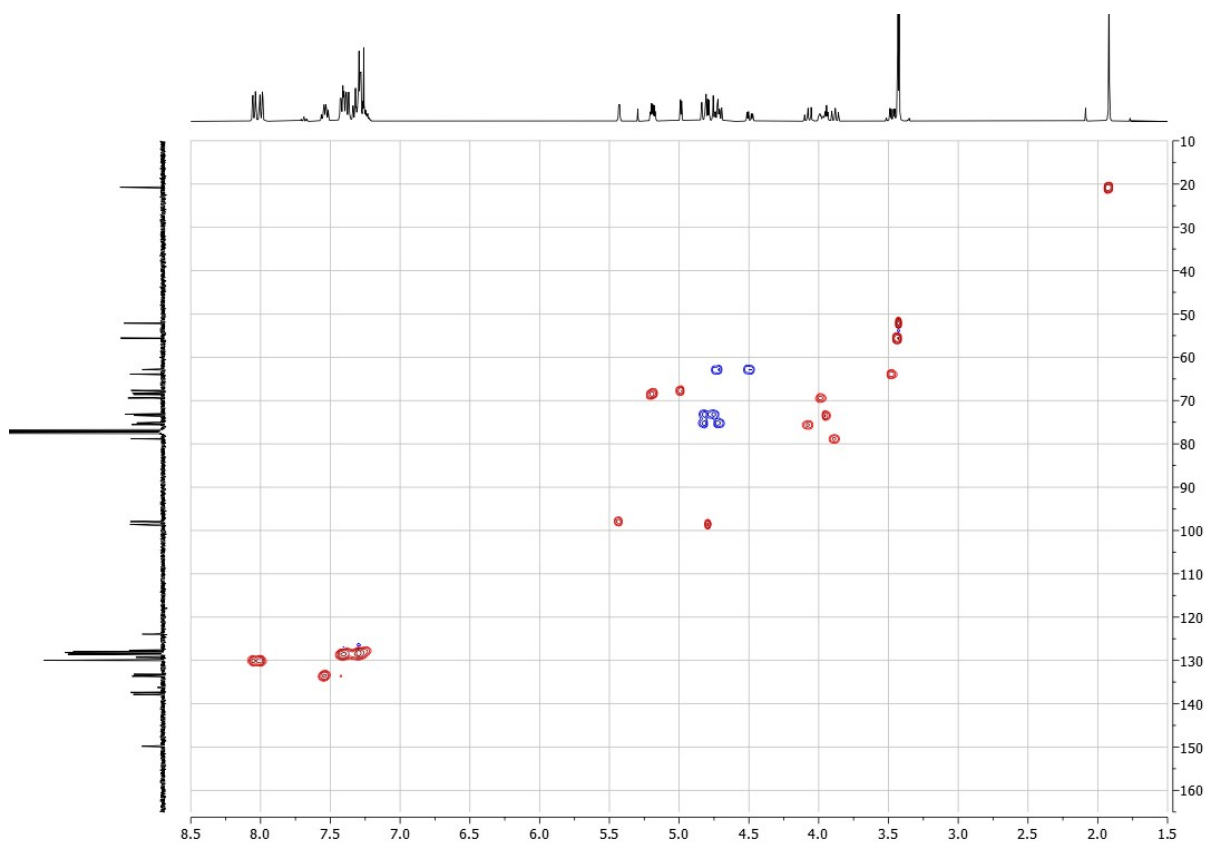

2D  $^1\text{H}$ ,  $^{13}\text{C}$ -HMBC (400 MHz x 101 MHz,  $\text{CDCl}_3$ ) spectra of **24**

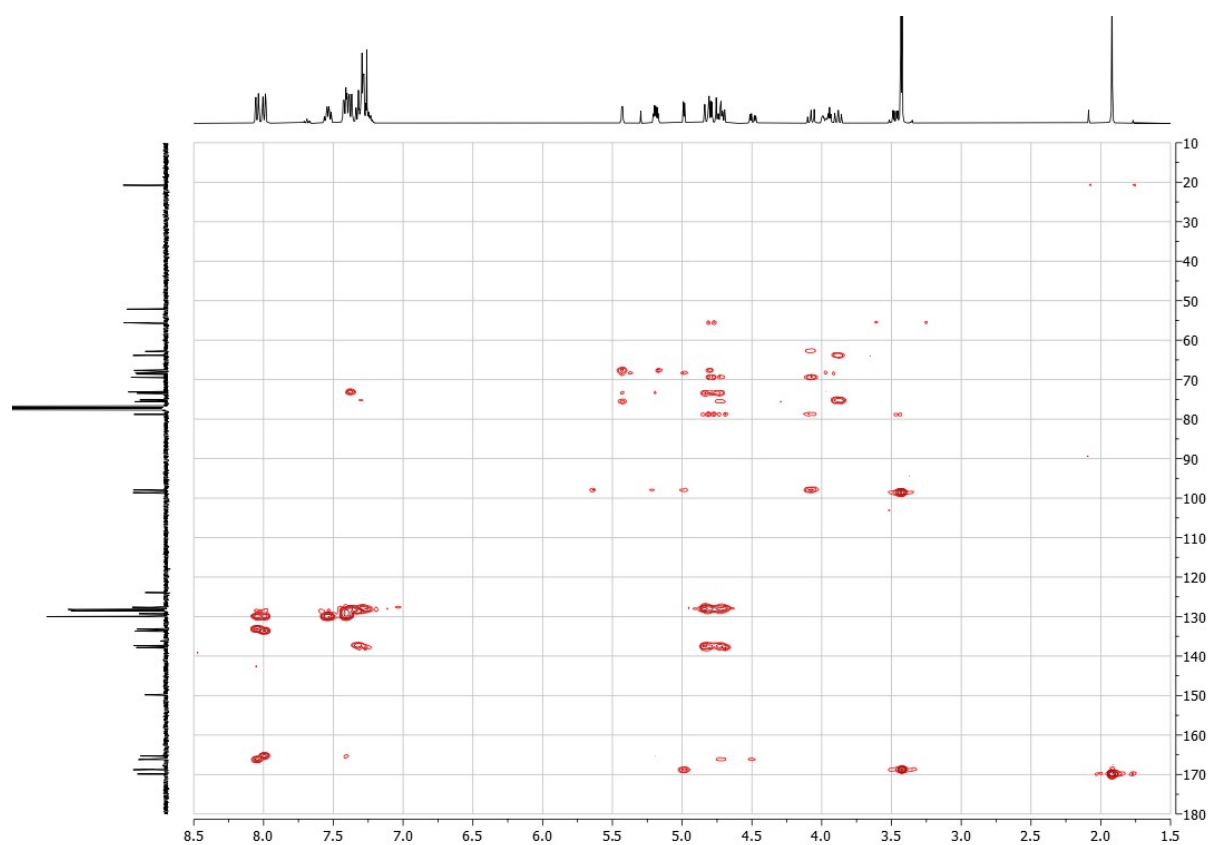

$^1\text{H}$  NMR (400 MHz,  $\text{CDCl}_3$ ) and  $^{13}\text{C}\{^1\text{H}\}$  NMR (101 MHz,  $\text{CDCl}_3$ ) spectra of **25**

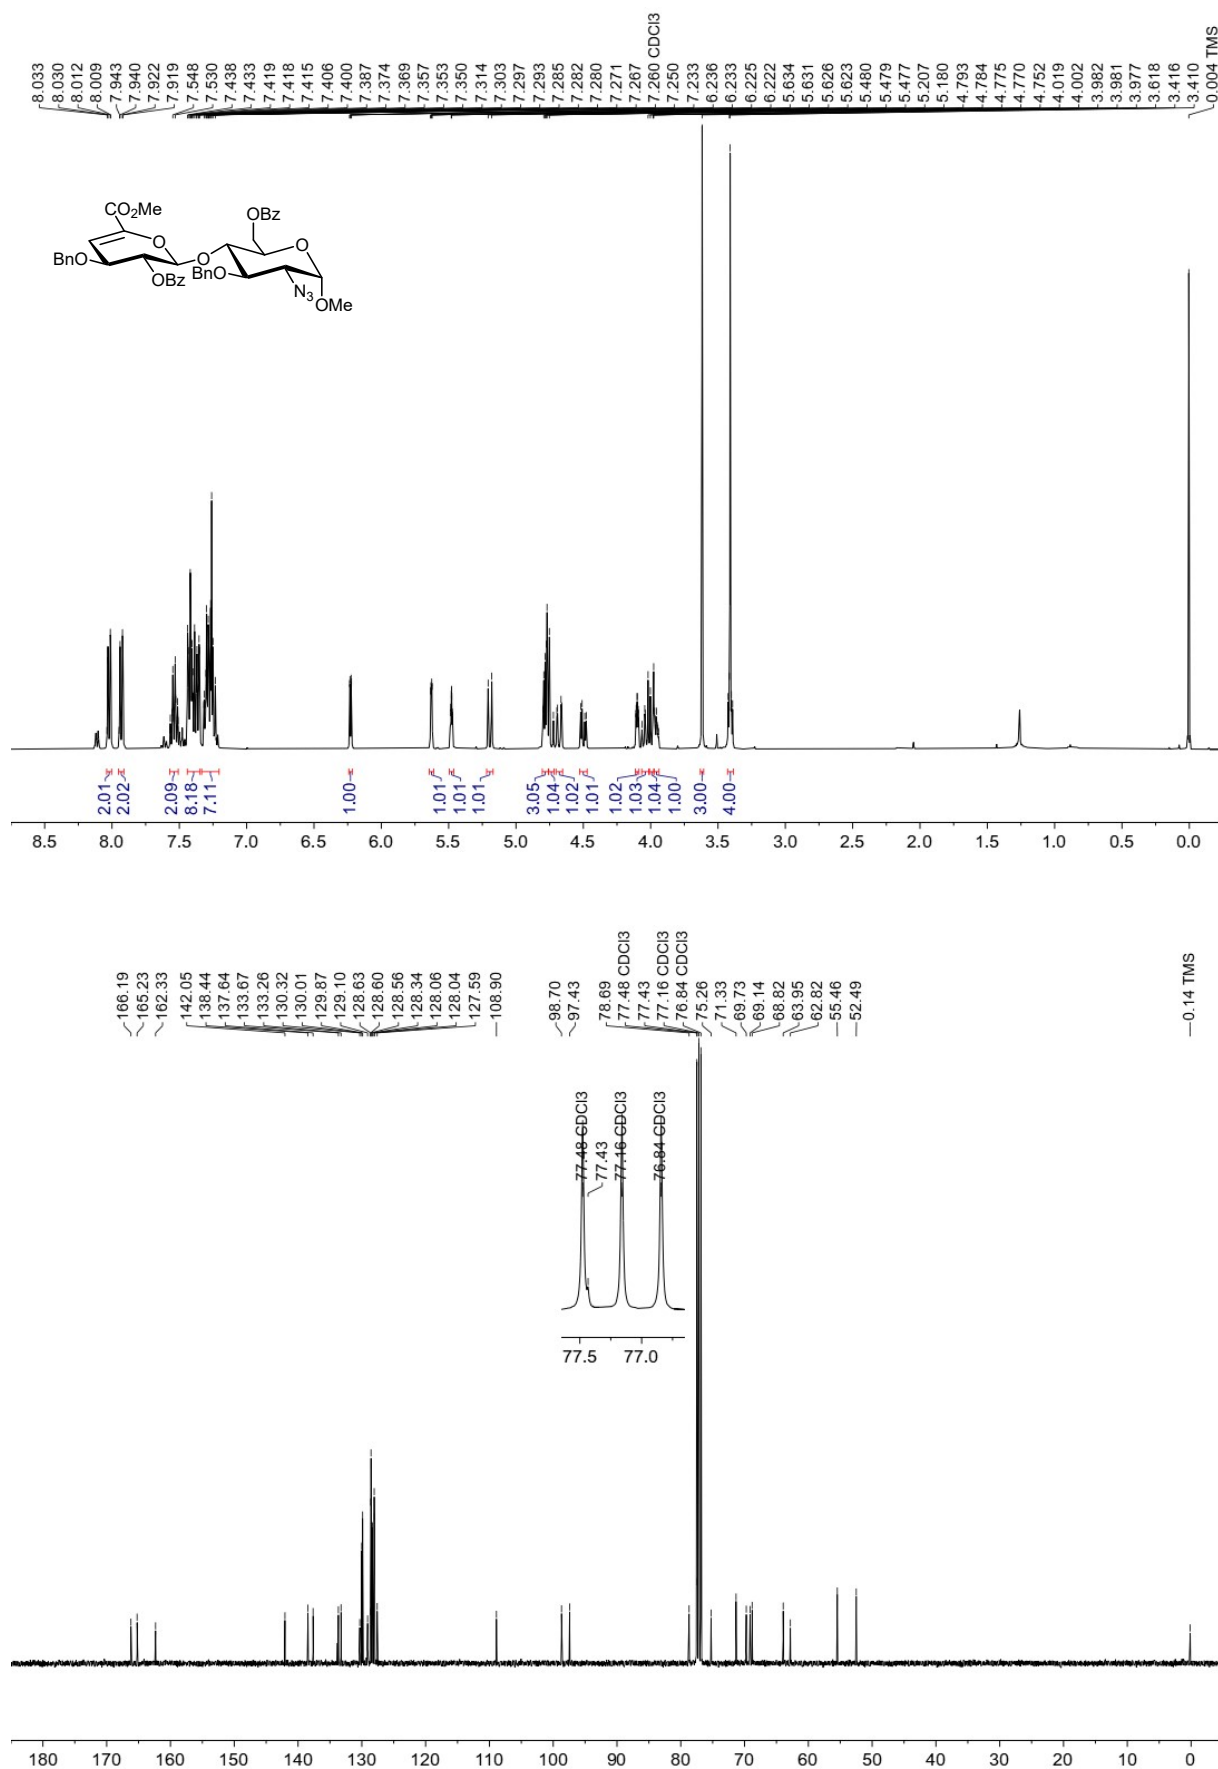

$^1\text{H}$  NMR (400 MHz,  $\text{CDCl}_3$ ) magnified spectra of **25**

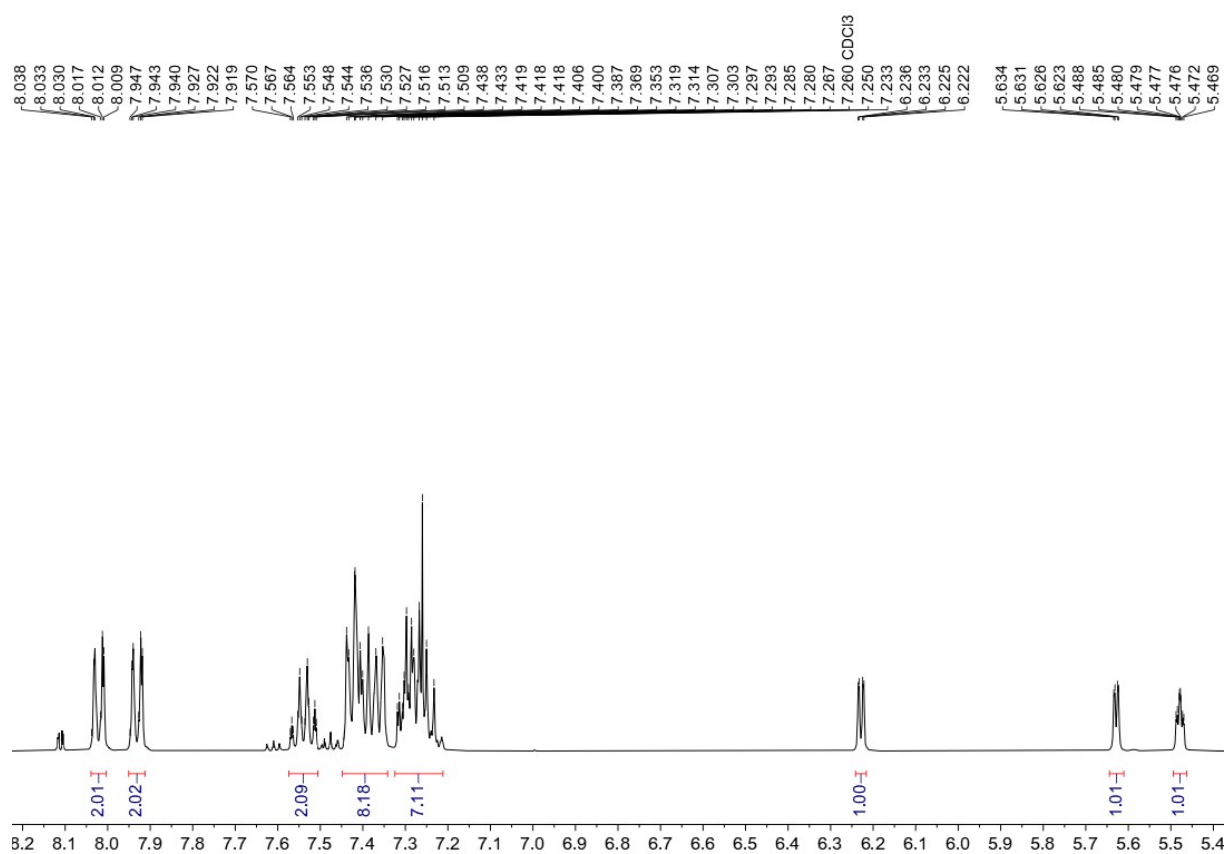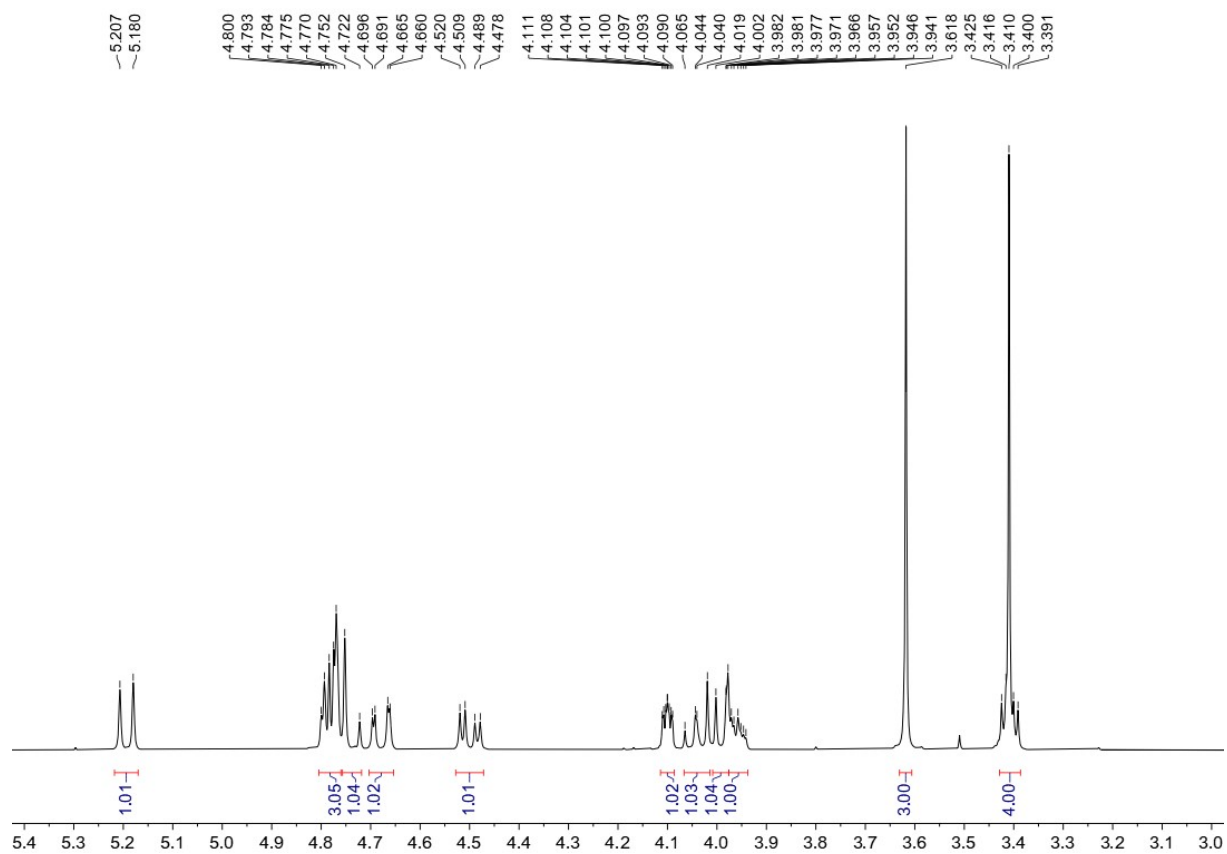



2D  $^1\text{H}$ ,  $^1\text{H}$ -COSY (400 MHz,  $\text{CDCl}_3$ ) spectra of **25**

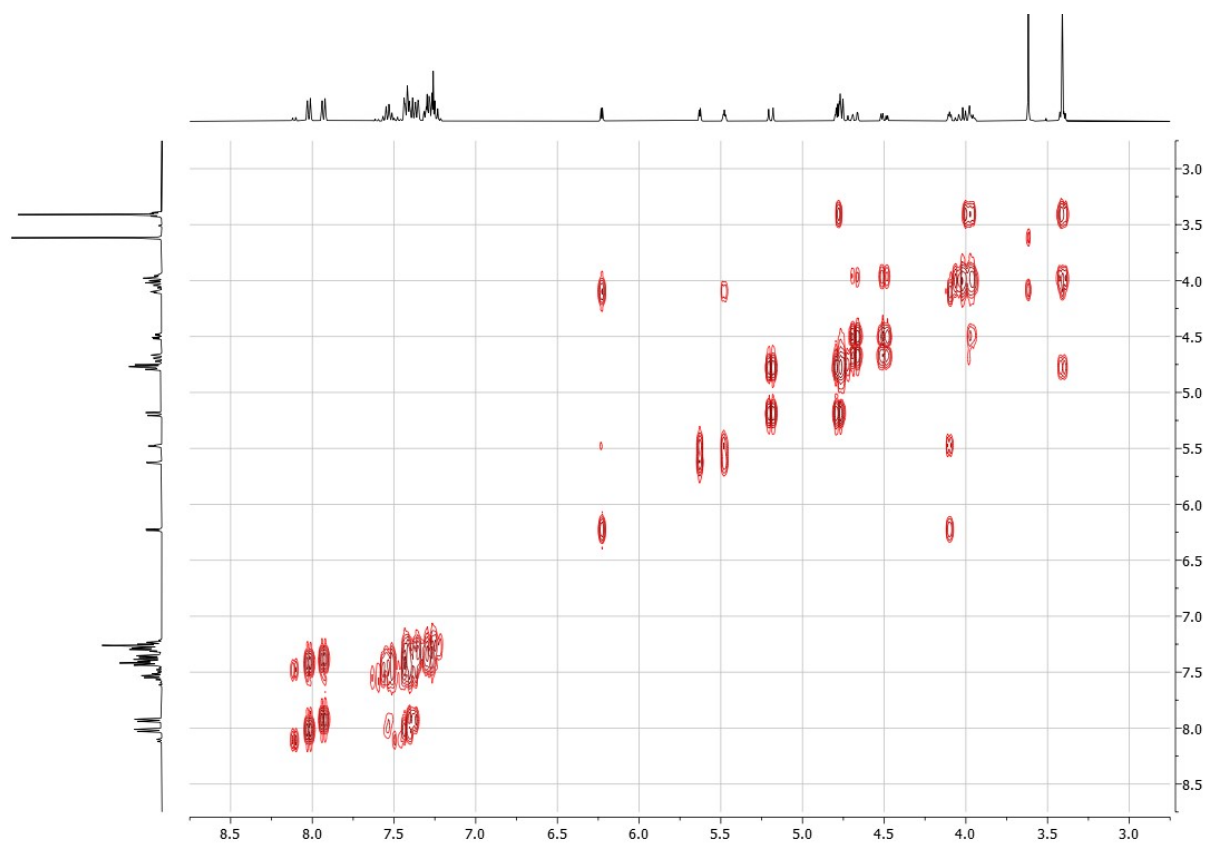

2D  $^1\text{H}$ ,  $^{13}\text{C}$ -HSQC (400 MHz x 101 MHz,  $\text{CDCl}_3$ ) spectra of **25**

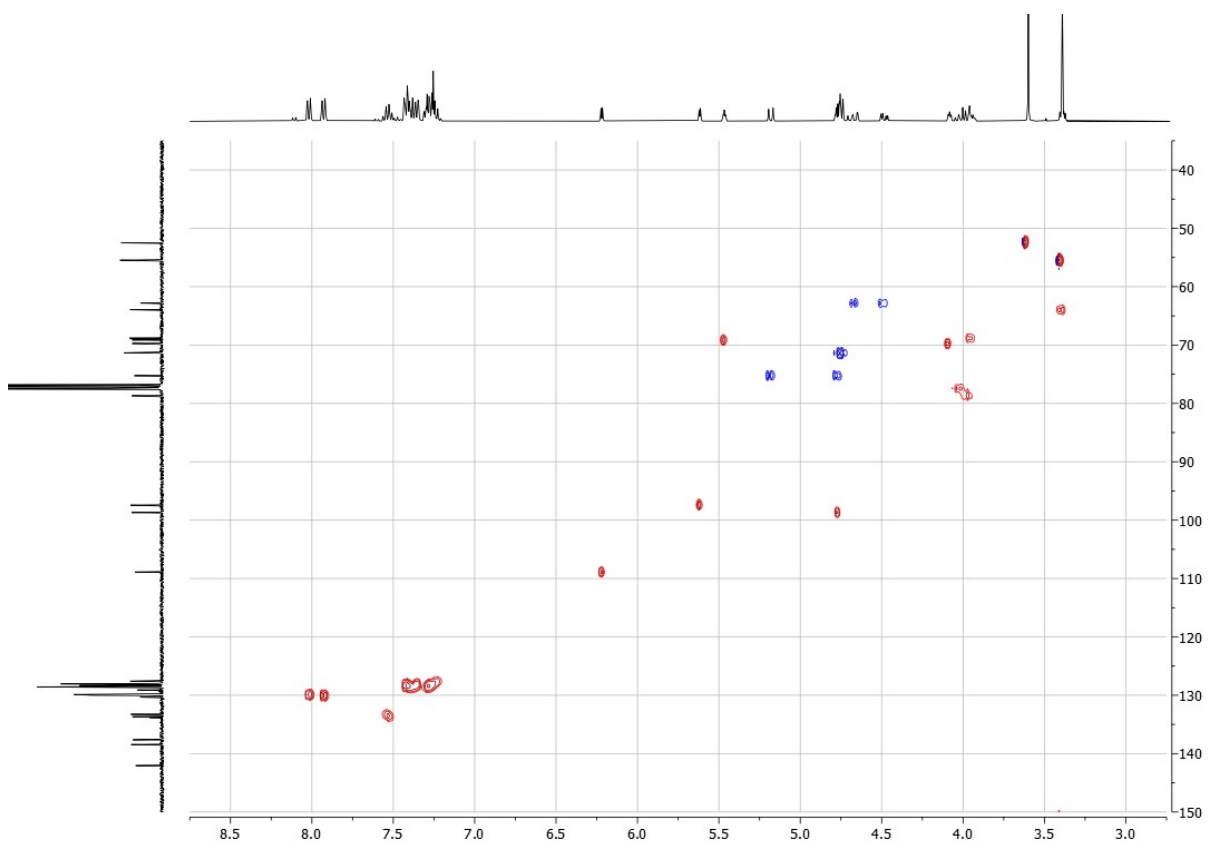

2D  $^1\text{H}$ ,  $^{13}\text{C}$ -HMBC (400 MHz x 101 MHz,  $\text{CDCl}_3$ ) spectra of **25**

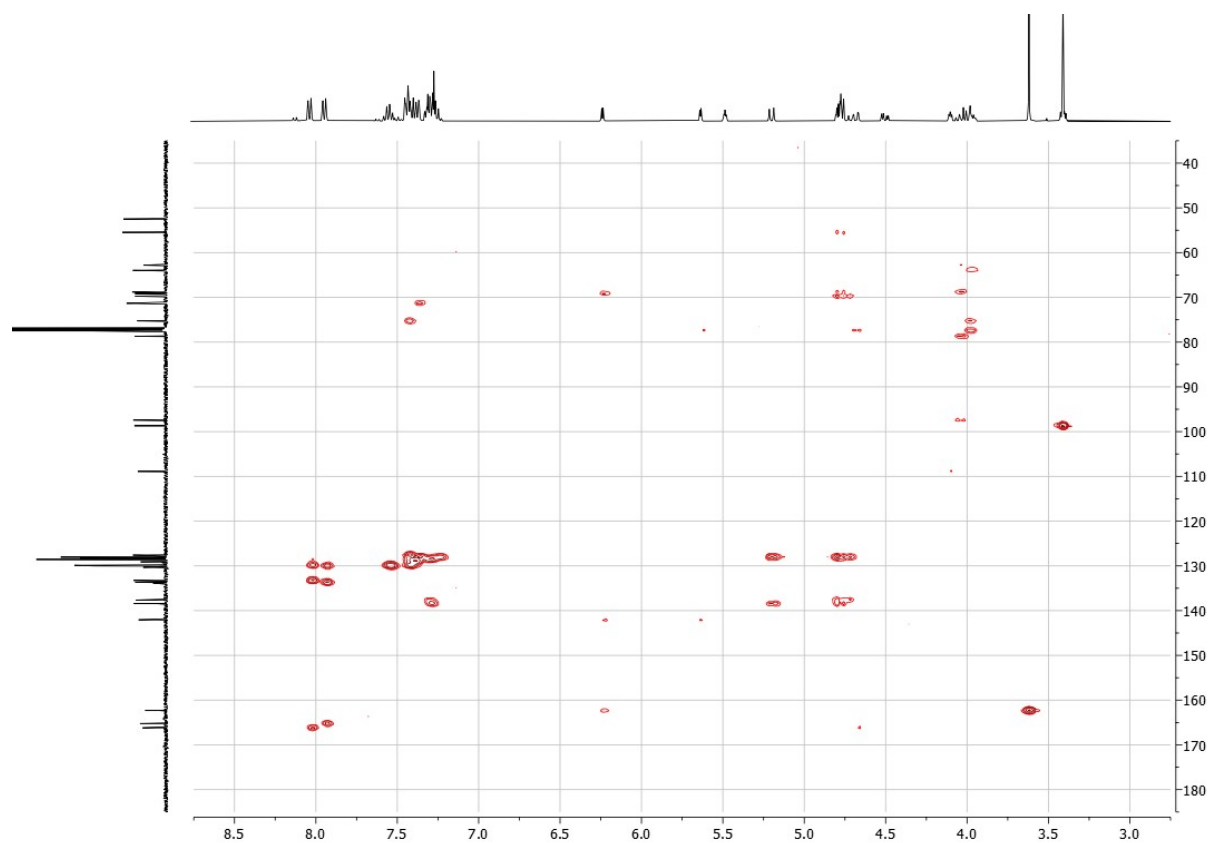

$^1\text{H}$  NMR (400 MHz,  $\text{CDCl}_3$ ) and  $^{13}\text{C}\{^1\text{H}\}$  NMR (101 MHz,  $\text{CDCl}_3$ ) spectra of **22**

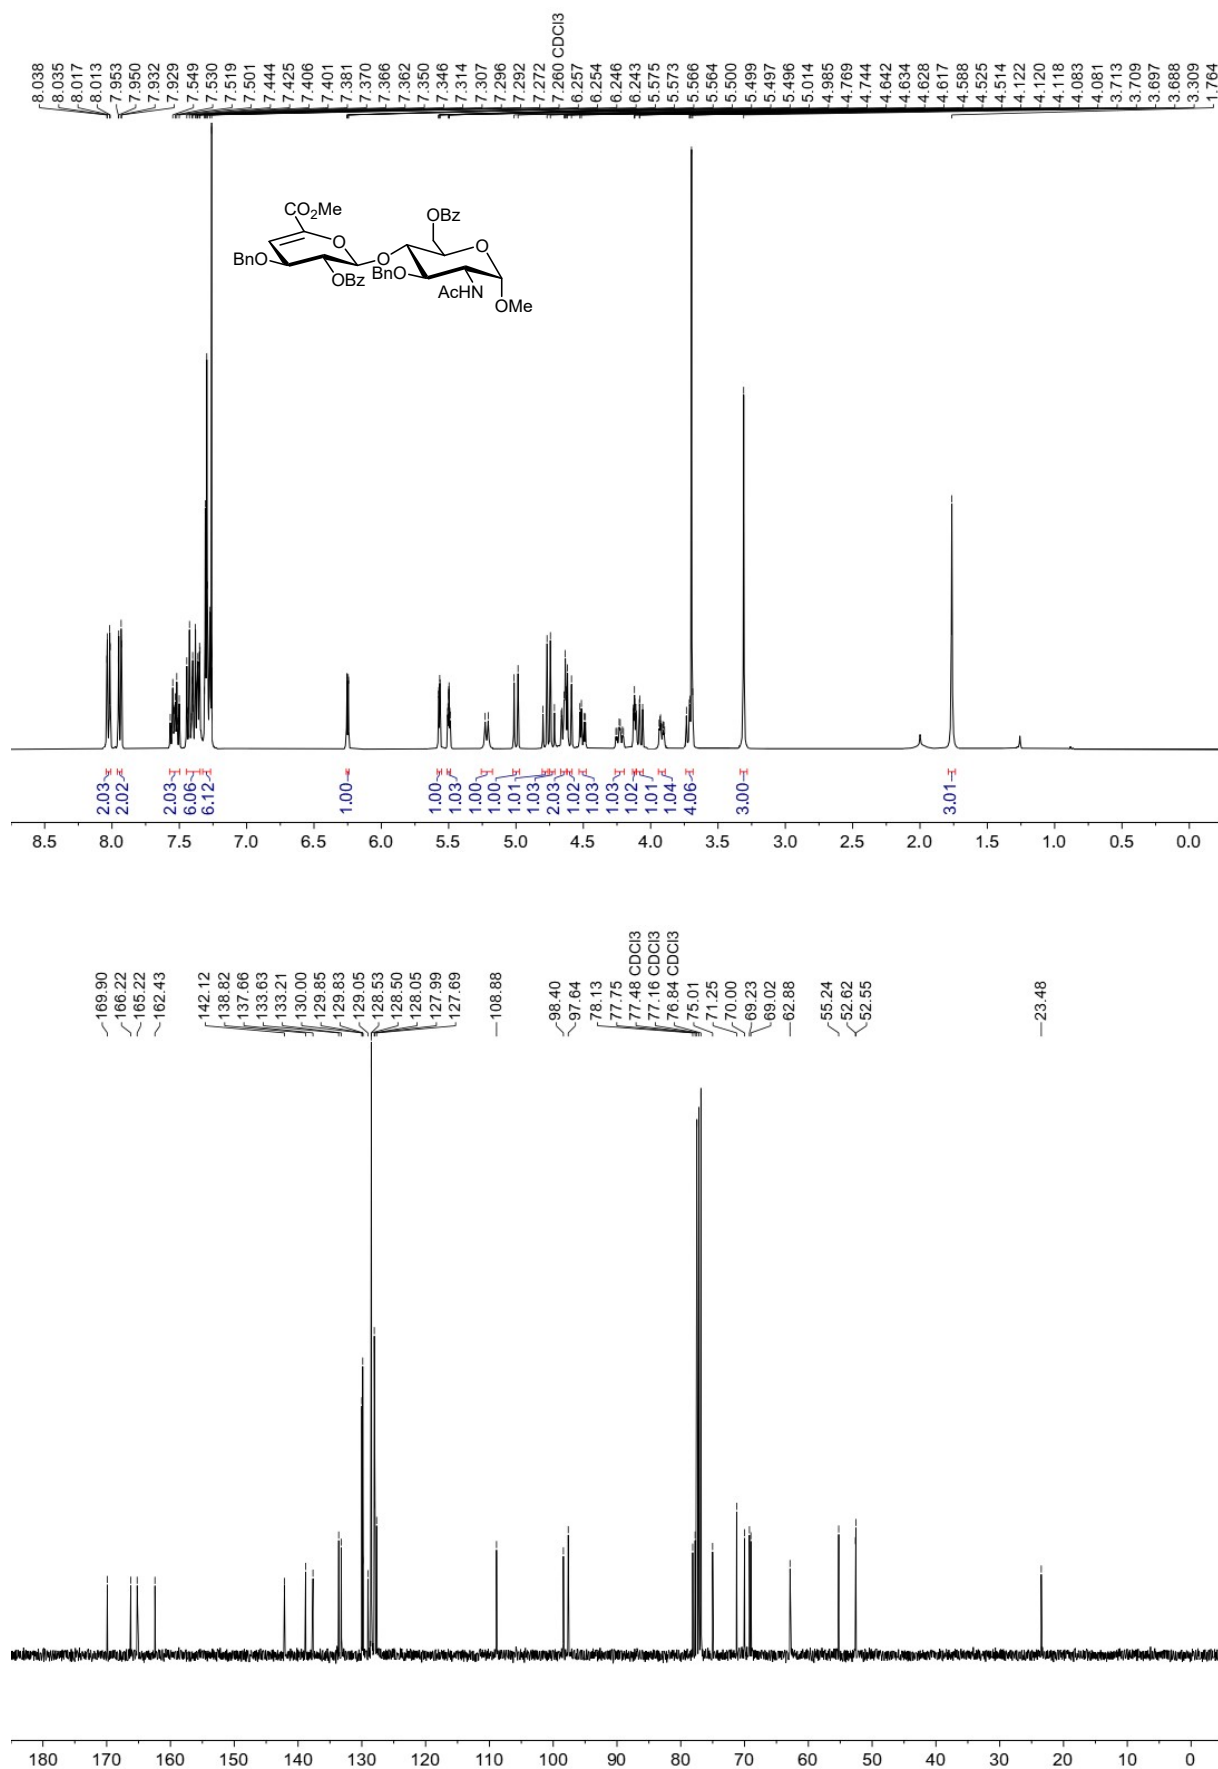

$^1\text{H}$  NMR (400 MHz,  $\text{CDCl}_3$ ) magnified spectra of **22**

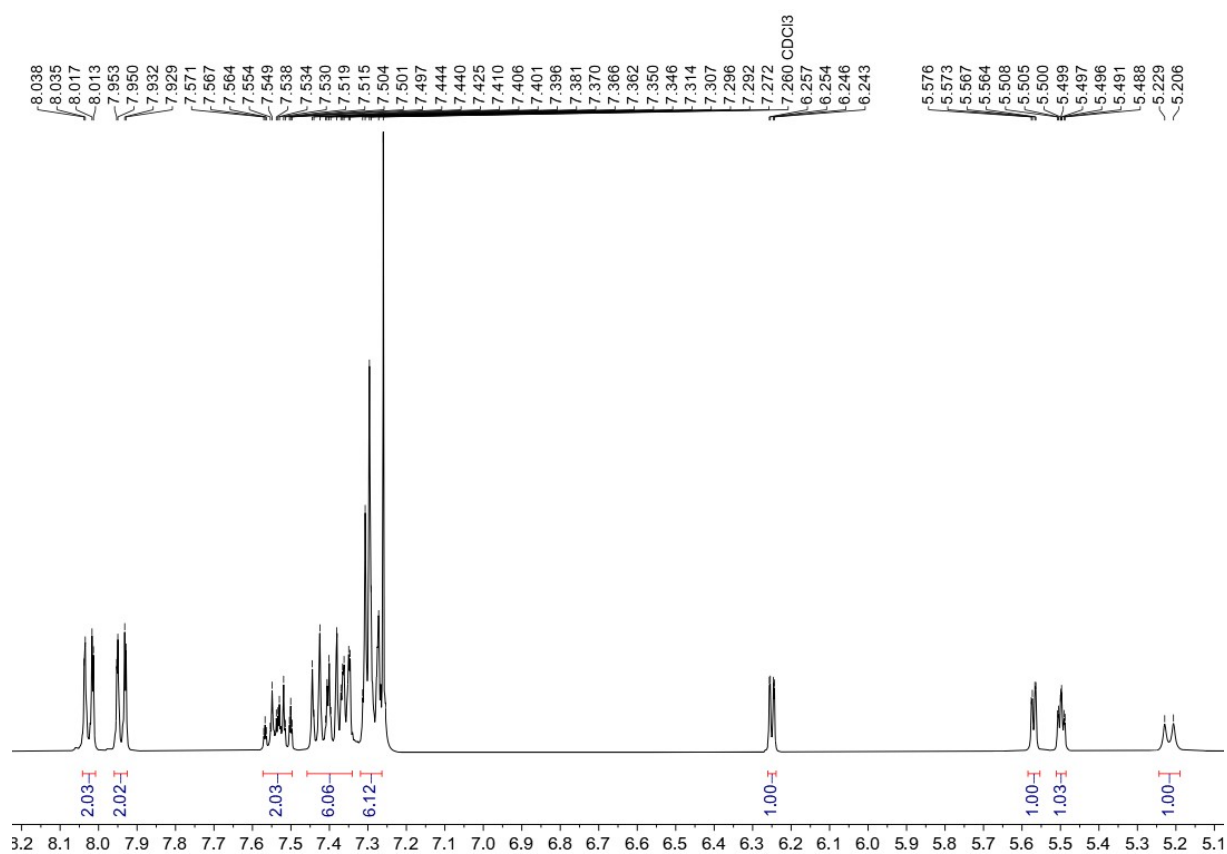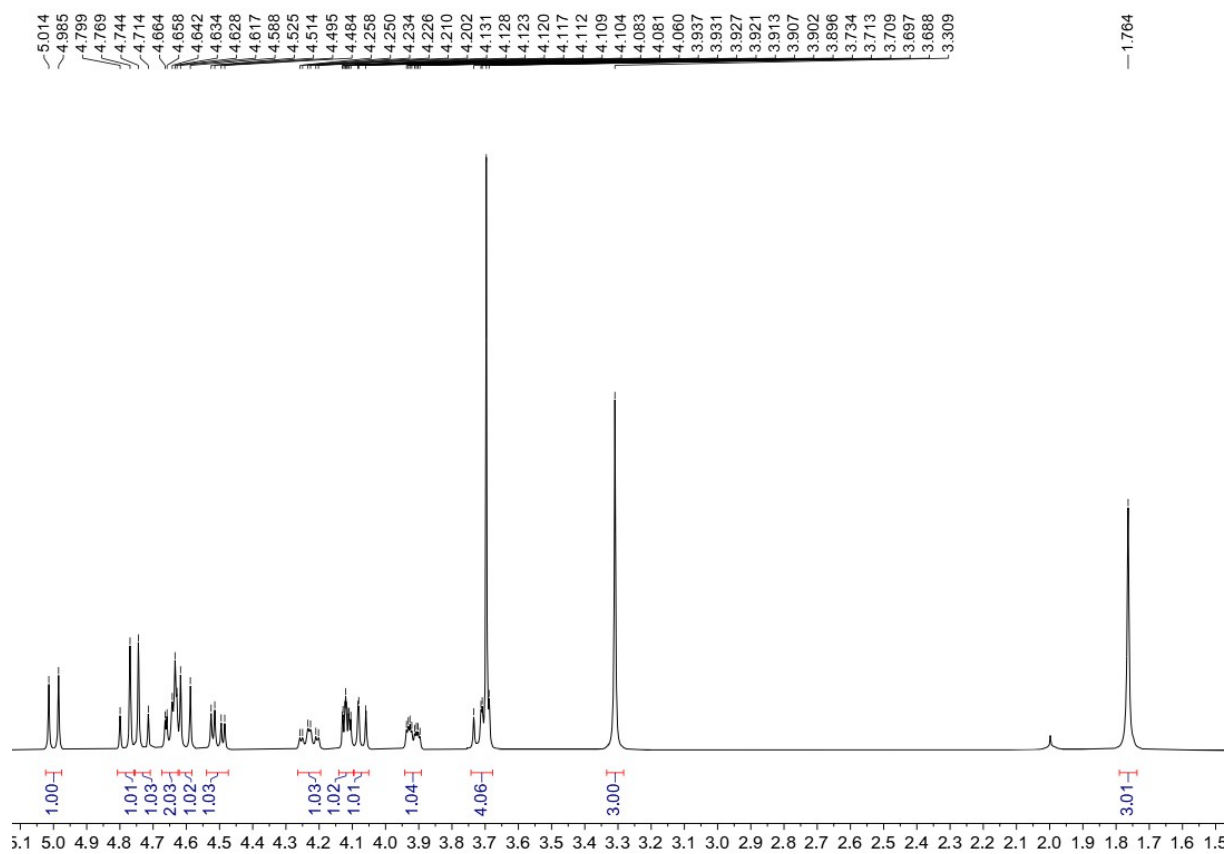

2D  $^1\text{H}$ ,  $^1\text{H}$ -TOCSY (400 MHz,  $\text{CDCl}_3$ ) spectra of **22**

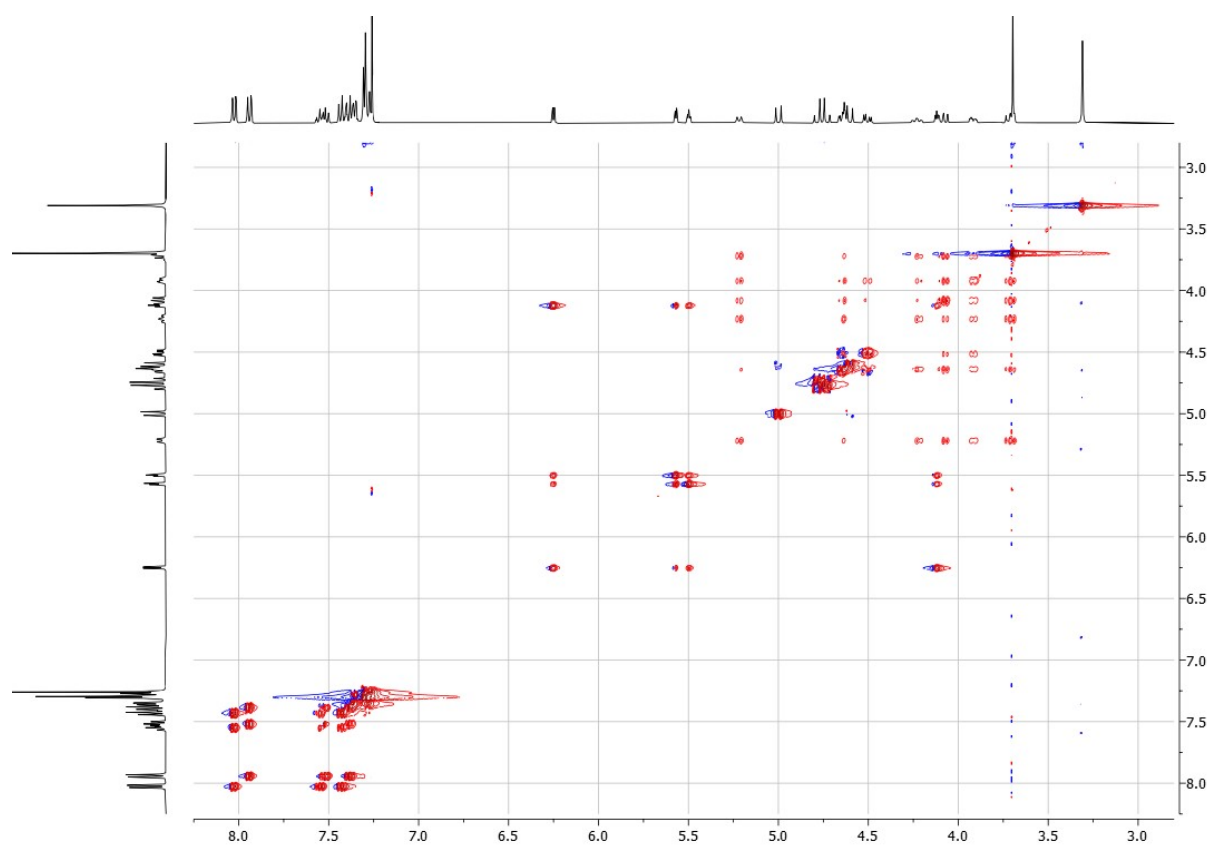

2D  $^1\text{H}$ ,  $^{13}\text{C}$ -HSQC (400 MHz x 101 MHz,  $\text{CDCl}_3$ ) spectra of **22**

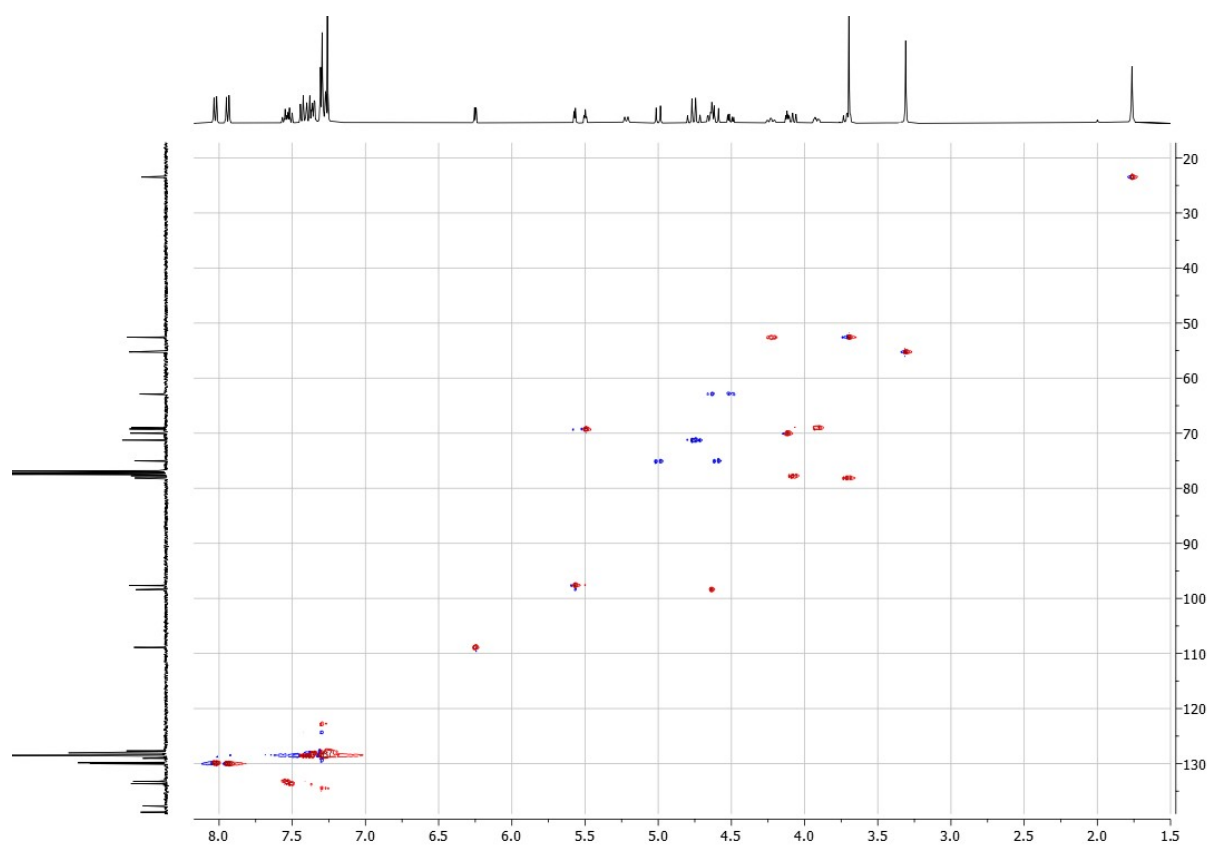

2D  $^1\text{H}$ ,  $^{13}\text{C}$ -HMBC (400 MHz x 101 MHz,  $\text{CDCl}_3$ ) spectra of **22**

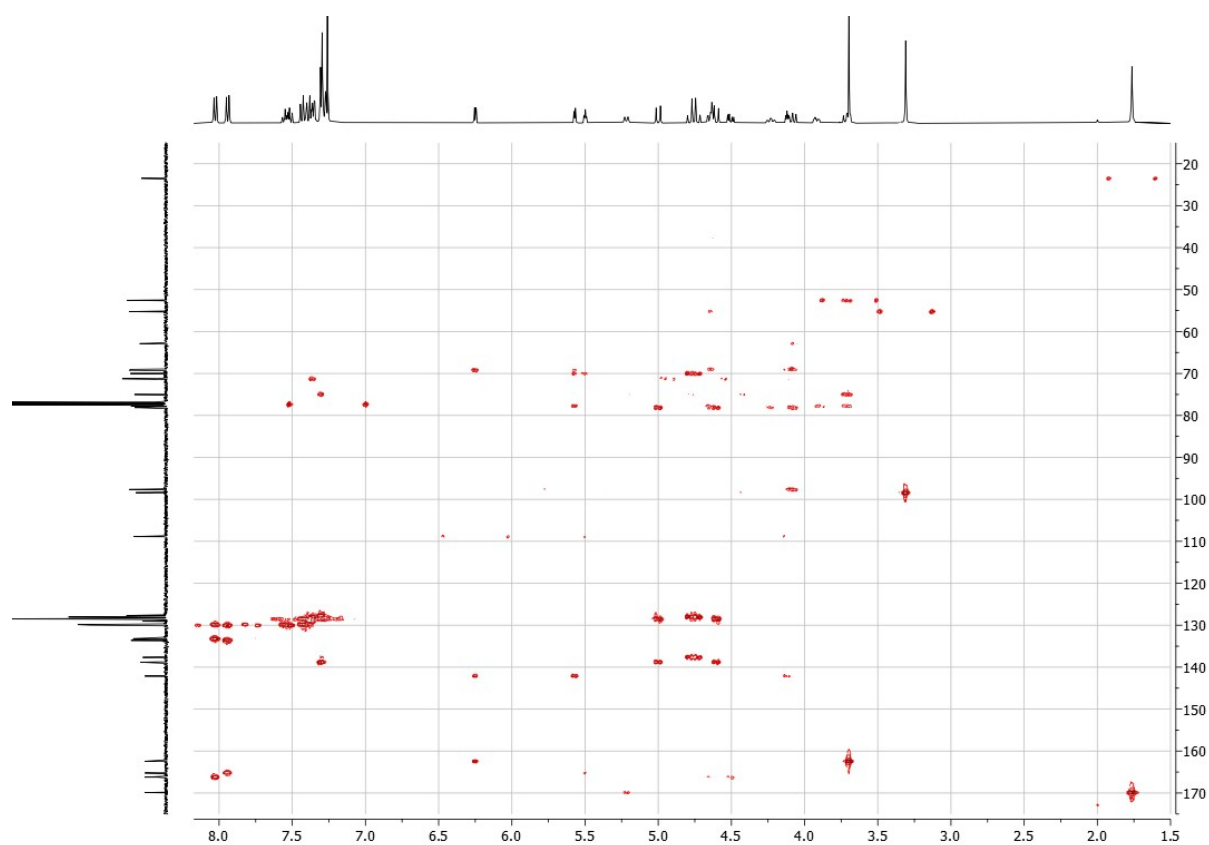

<sup>1</sup>H NMR (400 MHz, CDCl<sub>3</sub>) and <sup>13</sup>C{<sup>1</sup>H} NMR (101 MHz, CDCl<sub>3</sub>) spectra of **26**

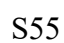

$^1\text{H}$  NMR (400 MHz,  $\text{CDCl}_3$ ) magnified spectra of **26**

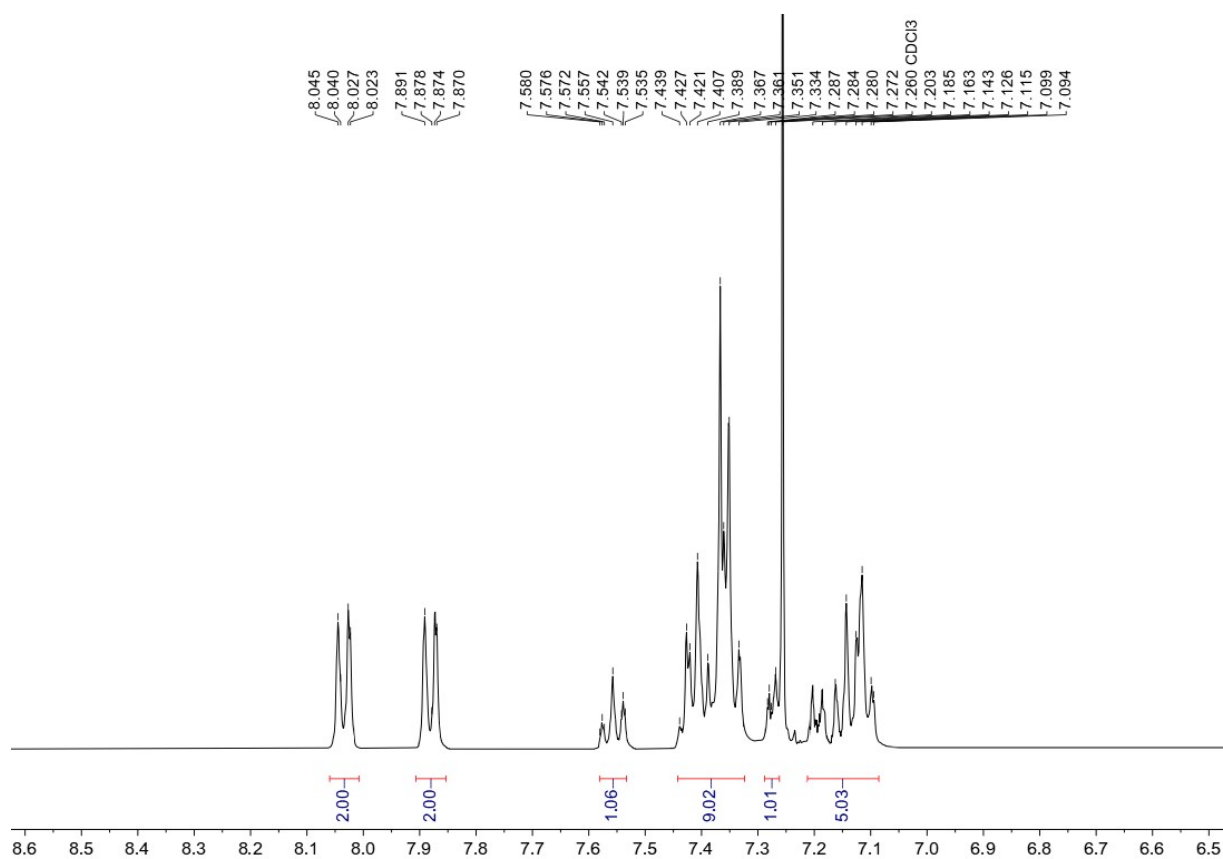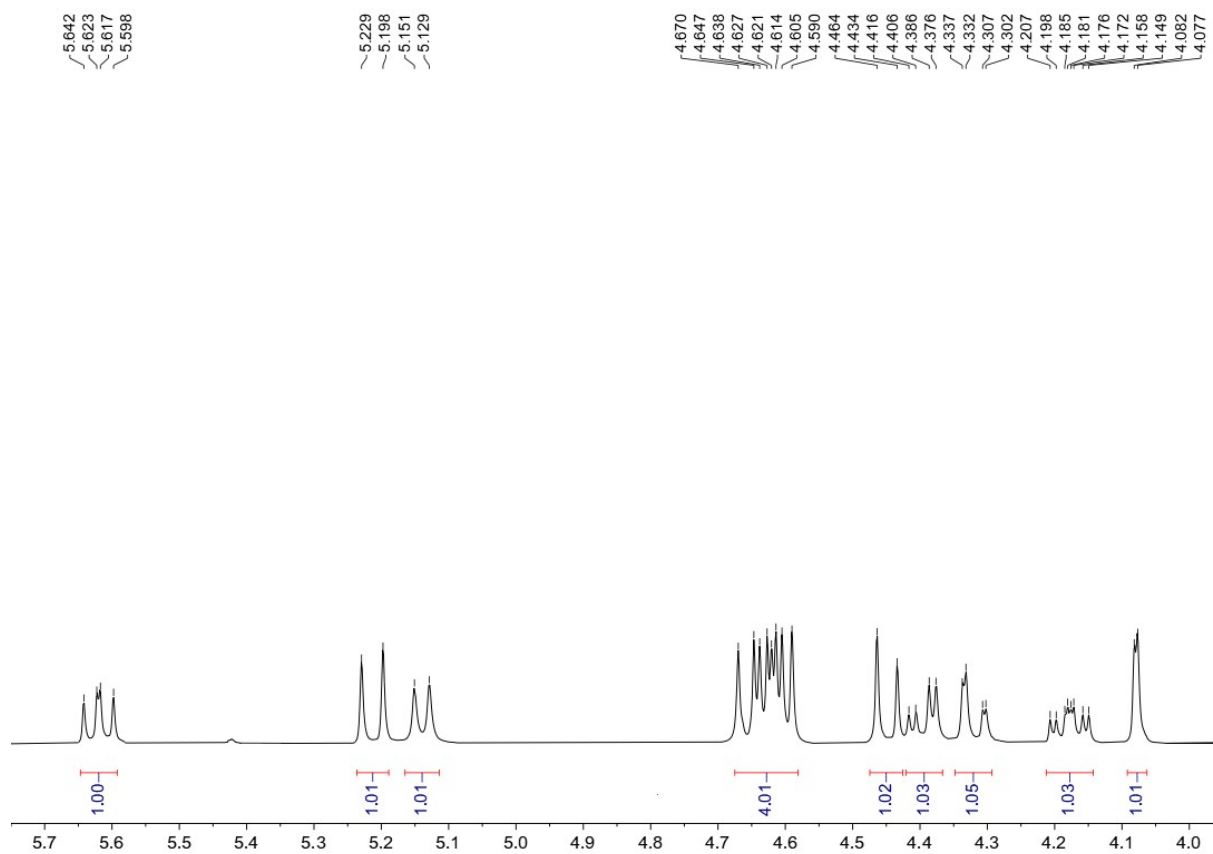



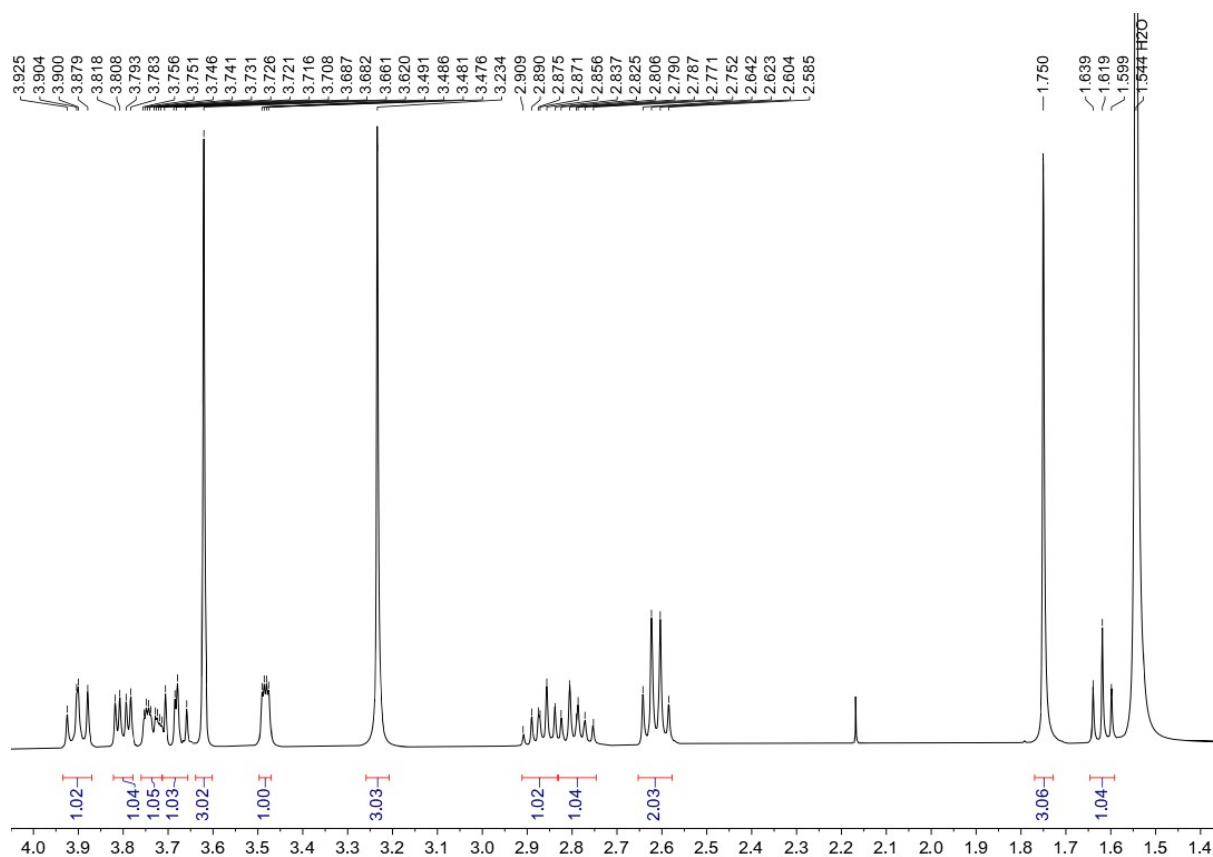

2D  $^1\text{H}$ ,  $^1\text{H}$ -COSY (400 MHz,  $\text{CDCl}_3$ ) spectra of **26**

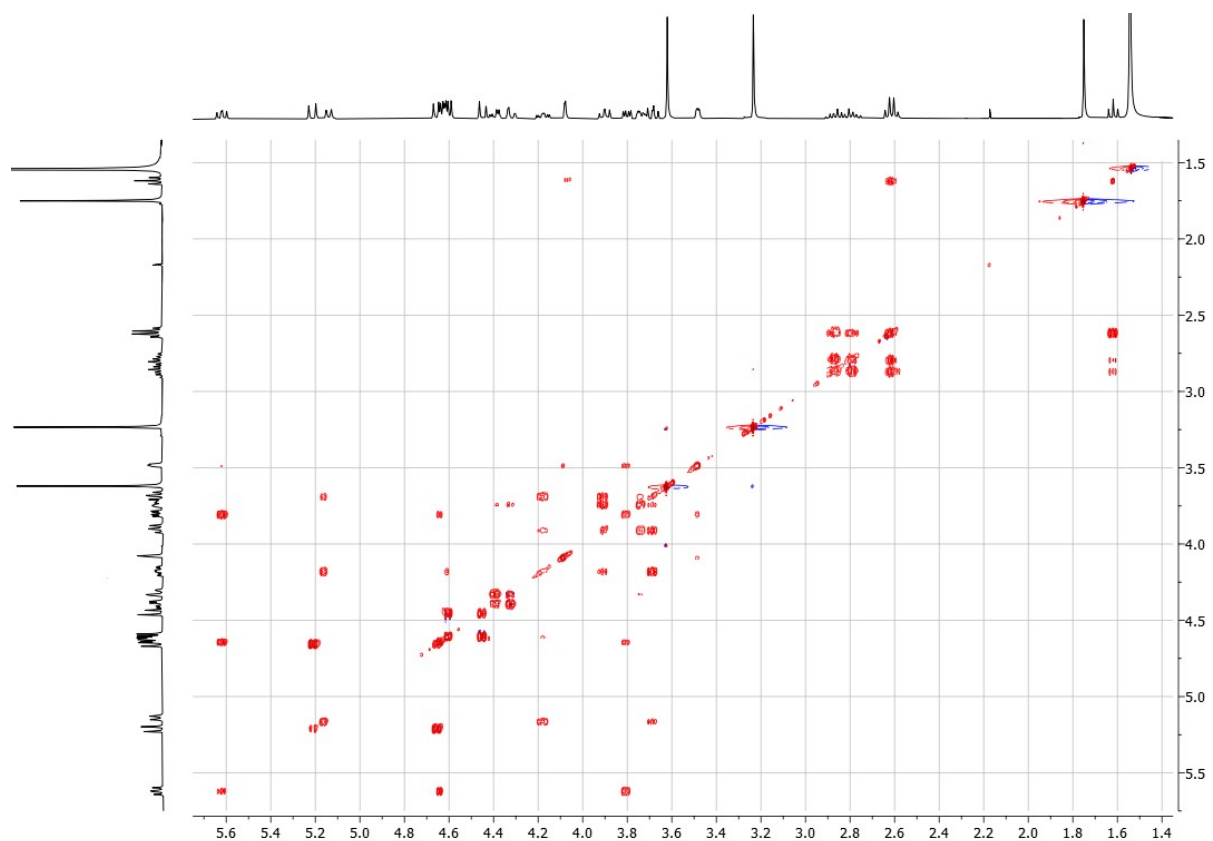

2D  $^1\text{H}$ ,  $^{13}\text{C}$ -HSQC (400 MHz x 101 MHz,  $\text{CDCl}_3$ ) spectra of **26**

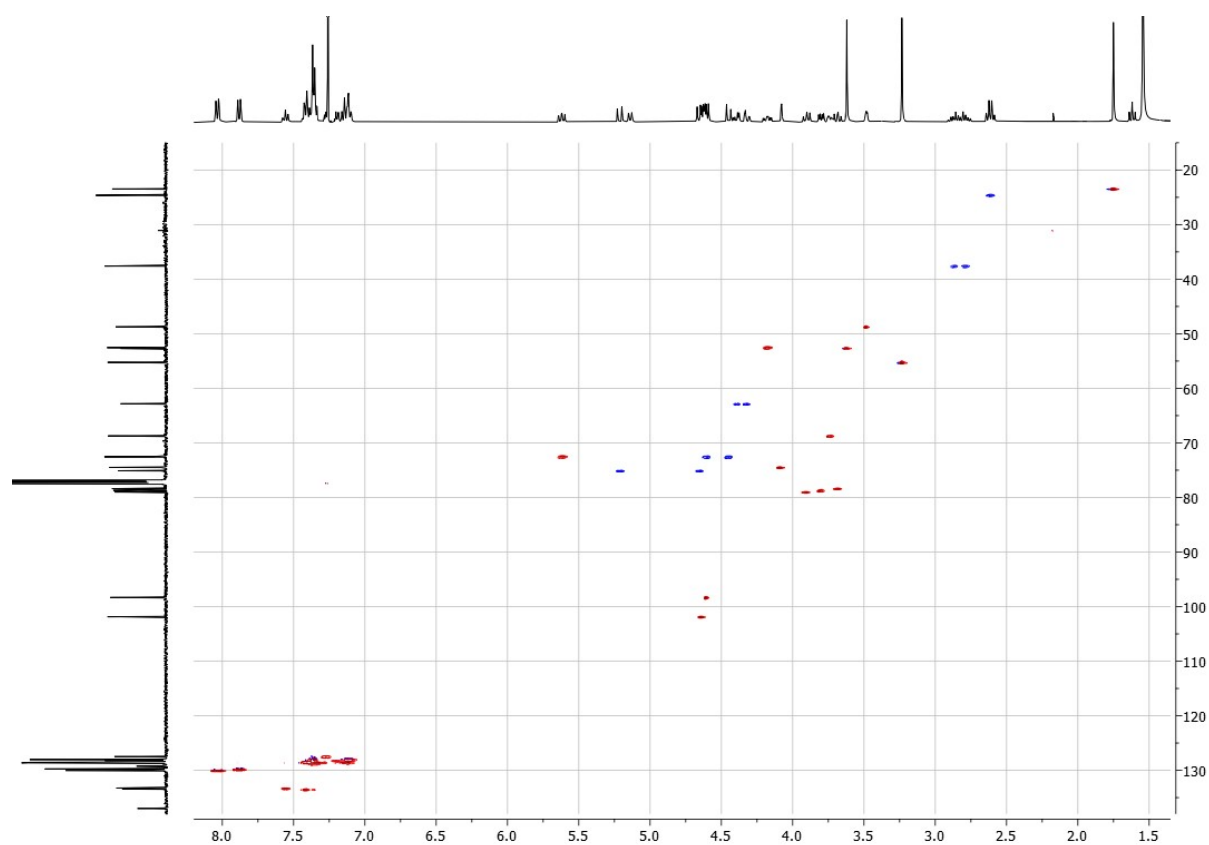

2D  $^1\text{H}$ ,  $^{13}\text{C}$ -HMBC (400 MHz x 101 MHz,  $\text{CDCl}_3$ ) spectra of **26**

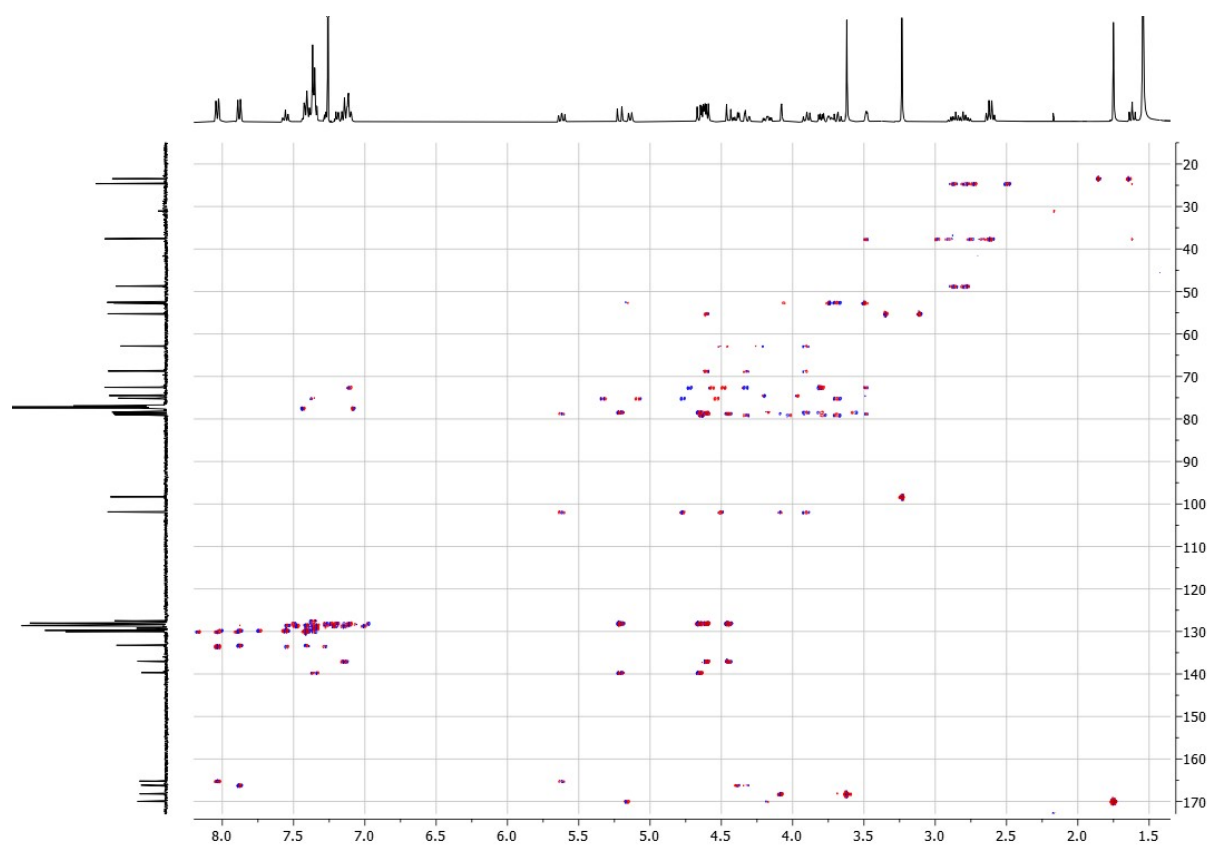

## 7. X-ray crystal structure data

Colourless crystals of **5a**, **6a'**, **6b** and **26** were mounted on a MiTeGen micromount with NVH immersion oil. Data were collected from a shock-cooled single crystal at 100(2)° K for **5a** on a Bruker D8 Quest ECO PhotonIII C7 three-circle diffractometer with a sealed X-ray tube using a graphite monochromator and a Bruker PHOTON III C7 detector and for **6a'**, **6b** and **26** on a Bruker APEX2 Kappa Duo Kappa diffractometer with a microfocus sealed X-ray tube using mirror optics as a monochromator and an APEX2 detector. The Bruker D8 Quest ECO was equipped with an Oxford Cryostream 800 low temperature device and used Mo  $K_{\alpha}$  radiation ( $\lambda = 0.71073 \text{ \AA}$ ) and the Bruker DUO was equipped with an Oxford Cobra low temperature device and used Cu  $K_{\alpha}$  radiation ( $\lambda = 1.54178 \text{ \AA}$ ).

All data were integrated with SAINT and a multi-scan absorption correction using SADABS was applied.<sup>1,2</sup> The structures were solved by dual methods using XT and refined by full-matrix least-squares methods against  $F^2$  by XL using Olex2.<sup>3-5</sup> All non-hydrogen atoms were refined with anisotropic displacement parameters. Some of their coordinates were refined freely and some on calculated positions using a riding model with their  $U_{\text{iso}}$  values constrained to 1.5 times the  $U_{\text{eq}}$  of their pivot atoms for terminal  $\text{sp}^3$  carbon atoms and 1.2 times for all other carbon atoms. Disordered moieties were refined using bond lengths restraints and displacement parameter restraints.

### *Refinement details:*

In **5a** the thiol S-H hydrogen located on the difference map and refined with restraints (DFIX). One AcO group was disordered over two locations (70:30 %) and modelled with geometric and displacement restraints (SADI, RIGU, ISOR) and constraints (EADP, C26).

In **6a'** part of the sugar ring (O1-C1-C2), methyl ester group and the dithiol are disordered and modelled in two locations (61:31 %) using restraints (SADI, RIGU, SIMU). Donor O-H hydrogen located on the difference map and refined using restraints (DFIX).

In **26** there are four independent molecules in the asymmetric unit with two water molecules. One benzyl aromatic ring is disordered and modelled in two locations with 50% occupancy. Restraints (SIMU, DANG, RIGU, SADI) and constraints (EADP, C15B, C15E) were used in the model. Water hydrogen atoms were fixed in place in optimum positions for hydrogen bonding. Other donor hydrogens (N-H) were placed on geometrically calculated positions and then refined using a riding model. Thiol hydrogens were located on the difference map and refined semi-free using restraints (DFIX).

Crystallographic data for the structures reported here have been deposited with the Cambridge Crystallographic Data Centre.<sup>6</sup> CCDC 2389449 (**5a**), 2389448 (**6a'**), 2389447 (**6b**) and 2389446 (**26**) contain the supplementary crystallographic data for this paper. These data can be obtained free of charge from the Cambridge Crystallographic Data Centre *via* [www.ccdc.cam.ac.uk/structures](http://www.ccdc.cam.ac.uk/structures).

**Table S1.** Crystal data and structure refinements for **5a**, **6a'**, **6b** and **26**.

| Identification No.                                              | <b>5a</b>                                                                      | <b>6a'</b>                                                                     | <b>6b</b>                                                                      | <b>26</b>                                                                       |
|-----------------------------------------------------------------|--------------------------------------------------------------------------------|--------------------------------------------------------------------------------|--------------------------------------------------------------------------------|---------------------------------------------------------------------------------|
| CCDC number                                                     | 2389449                                                                        | 2389448                                                                        | 2389447                                                                        | 2389446                                                                         |
| Empirical formula                                               | C <sub>15</sub> H <sub>22</sub> O <sub>9</sub> S <sub>2</sub>                  | C <sub>13</sub> H <sub>18</sub> O <sub>8</sub> S <sub>2</sub>                  | C <sub>16</sub> H <sub>24</sub> O <sub>9</sub> S <sub>2</sub>                  | C <sub>92</sub> H <sub>104</sub> N <sub>2</sub> O <sub>27</sub> S <sub>4</sub>  |
| Formula weight                                                  | 410.44                                                                         | 366.39                                                                         | 424.47                                                                         | 1798.01                                                                         |
| Temperature (K)                                                 | 100(2)                                                                         | 100(2)                                                                         | 100(2)                                                                         | 100(2)                                                                          |
| Crystal system                                                  | monoclinic                                                                     | monoclinic                                                                     | orthorhombic                                                                   | triclinic                                                                       |
| Space group (number)                                            | <i>P</i> 2 <sub>1</sub> (4)                                                    | <i>P</i> 2 <sub>1</sub> (4)                                                    | <i>P</i> 2 <sub>1</sub> 2 <sub>1</sub> (19)                                    | <i>P</i> 1 (1)                                                                  |
| <i>a</i> (Å)                                                    | 11.1283(3)                                                                     | 9.1441(5)                                                                      | 8.5662(3)                                                                      | 10.8947(7)                                                                      |
| <i>b</i> (Å)                                                    | 7.6491(2)                                                                      | 8.1239(4)                                                                      | 11.8991(4)                                                                     | 15.2408(9)                                                                      |
| <i>c</i> (Å)                                                    | 11.5435(3)                                                                     | 11.0985(5)                                                                     | 19.6088(7)                                                                     | 27.3806(16)                                                                     |
| $\alpha$ (°)                                                    | 90                                                                             | 90                                                                             | 90                                                                             | 81.262(4)                                                                       |
| $\beta$ (°)                                                     | 92.8088(14)                                                                    | 94.130(3)                                                                      | 90                                                                             | 85.221(4)                                                                       |
| $\gamma$ (°)                                                    | 90                                                                             | 90                                                                             | 90                                                                             | 81.397(4)                                                                       |
| Volume (Å <sup>3</sup> )                                        | 981.42(4)                                                                      | 822.32(7)                                                                      | 1998.73(12)                                                                    | 4434.5(5)                                                                       |
| <i>Z</i>                                                        | 2                                                                              | 2                                                                              | 4                                                                              | 2                                                                               |
| $\rho_{\text{calc}}$ (gcm <sup>-3</sup> )                       | 1.389                                                                          | 1.480                                                                          | 1.411                                                                          | 1.347                                                                           |
| $\mu$ (mm <sup>-1</sup> )                                       | 0.314                                                                          | 3.296                                                                          | 2.828                                                                          | 1.658                                                                           |
| <i>F</i> (000)                                                  | 432                                                                            | 384                                                                            | 896                                                                            | 1900                                                                            |
| Crystal size (mm <sup>3</sup> )                                 | 0.432x0.073x0.055                                                              | 0.358x0.034x0.032                                                              | 0.194x0.176x0.116                                                              | 0.416x0.122x0.055                                                               |
| Crystal colour                                                  | colourless                                                                     | colourless                                                                     | colourless                                                                     | colourless                                                                      |
| Crystal shape                                                   | needle                                                                         | plate                                                                          | fragment                                                                       | plate                                                                           |
| Radiation                                                       | Mo <i>K</i> $\alpha$<br>( $\lambda$ = 0.71073 Å)                               | Cu <i>K</i> $\alpha$<br>( $\lambda$ = 1.54178 Å)                               | Cu <i>K</i> $\alpha$<br>( $\lambda$ = 1.54178 Å)                               | Cu <i>K</i> $\alpha$<br>( $\lambda$ = 1.54178 Å)                                |
| 2 $\theta$ range (°)                                            | 6.39 to 56.62 (0.75Å)                                                          | 7.99 to 140.69 (0.82Å)                                                         | 8.69 to 140.00 (0.82Å)                                                         | 3.27 to 141.43 (0.82Å)                                                          |
| Index ranges                                                    | -14 ≤ <i>h</i> ≤ 14<br>-10 ≤ <i>k</i> ≤ 10<br>-15 ≤ <i>l</i> ≤ 15              | -11 ≤ <i>h</i> ≤ 11<br>-9 ≤ <i>k</i> ≤ 9<br>-13 ≤ <i>l</i> ≤ 13                | -10 ≤ <i>h</i> ≤ 10<br>-14 ≤ <i>k</i> ≤ 13<br>-23 ≤ <i>l</i> ≤ 23              | -12 ≤ <i>h</i> ≤ 13<br>-18 ≤ <i>k</i> ≤ 18<br>-33 ≤ <i>l</i> ≤ 32               |
| Reflections collected                                           | 27083                                                                          | 12870                                                                          | 29973                                                                          | 90545                                                                           |
| Independent reflections                                         | 4871<br><i>R</i> <sub>int</sub> = 0.0611<br><i>R</i> <sub>sigma</sub> = 0.0531 | 3072<br><i>R</i> <sub>int</sub> = 0.0610<br><i>R</i> <sub>sigma</sub> = 0.0512 | 3770<br><i>R</i> <sub>int</sub> = 0.0429<br><i>R</i> <sub>sigma</sub> = 0.0212 | 31569<br><i>R</i> <sub>int</sub> = 0.0696<br><i>R</i> <sub>sigma</sub> = 0.0830 |
| Completeness                                                    | 99.8 %                                                                         | 99.9 %                                                                         | 100.0 %                                                                        | 99.7 %                                                                          |
| Data / Restraints / Parameters                                  | 4871/59/266                                                                    | 3072/475/316                                                                   | 3770/1/252                                                                     | 31569/273/2299                                                                  |
| Goodness-of-fit on <i>F</i> <sup>2</sup>                        | 1.080                                                                          | 1.079                                                                          | 1.036                                                                          | 1.046                                                                           |
| Final <i>R</i> indexes<br>[ <i>I</i> ≥ 2 $\sigma$ ( <i>I</i> )] | <i>R</i> <sub>1</sub> = 0.0440<br><i>wR</i> <sub>2</sub> = 0.0982              | <i>R</i> <sub>1</sub> = 0.0530<br><i>wR</i> <sub>2</sub> = 0.1413              | <i>R</i> <sub>1</sub> = 0.0326<br><i>wR</i> <sub>2</sub> = 0.0897              | <i>R</i> <sub>1</sub> = 0.0884<br><i>wR</i> <sub>2</sub> = 0.2286               |
| Final <i>R</i> indexes<br>[all data]                            | <i>R</i> <sub>1</sub> = 0.0671<br><i>wR</i> <sub>2</sub> = 0.1080              | <i>R</i> <sub>1</sub> = 0.0602<br><i>wR</i> <sub>2</sub> = 0.1476              | <i>R</i> <sub>1</sub> = 0.0329<br><i>wR</i> <sub>2</sub> = 0.0900              | <i>R</i> <sub>1</sub> = 0.1098<br><i>wR</i> <sub>2</sub> = 0.2512               |
| Largest diff. peak / hole (eÅ <sup>-3</sup> )                   | 0.39/-0.30                                                                     | 0.28/-0.18                                                                     | 0.37/-0.25                                                                     | 0.65/-0.56                                                                      |
| Flack <i>X</i> parameter                                        | -0.02(4)                                                                       | 0.01(4)                                                                        | -0.009(5)                                                                      | 0.01(2)                                                                         |

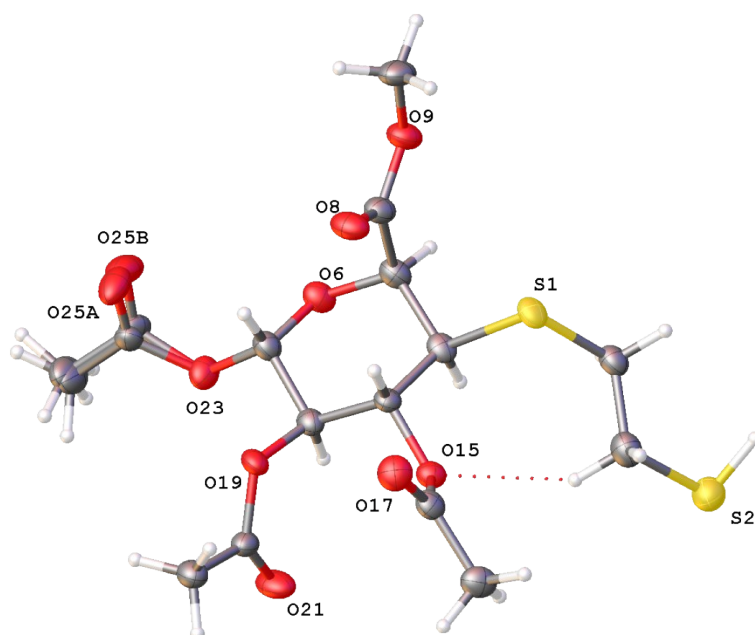

**Fig. S1.** Disordered molecular structure of **5a** with one AcO group disordered over two locations (70:30 %). Displacement parameters shown at 50% probability. Heteroatoms labelled only.

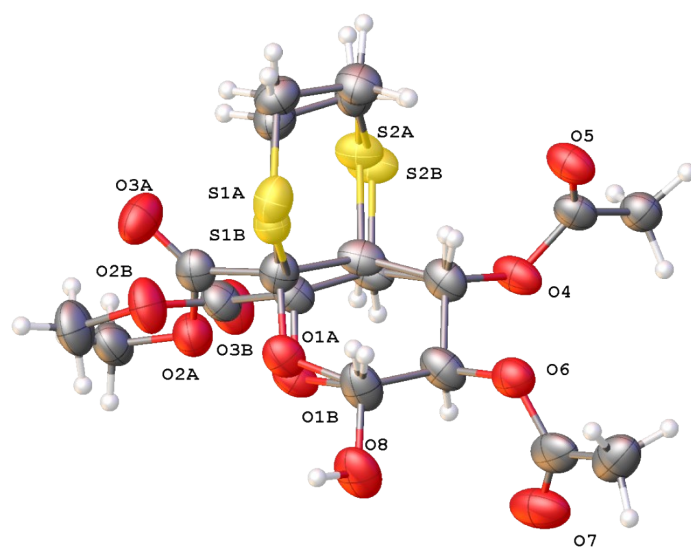

**Fig. S2.** Structure of **6a'** showing the disorder in the sugar ring, methyl ester and dithiol ring. Displacement parameters shown at 50% probability. Heteroatoms labelled only.

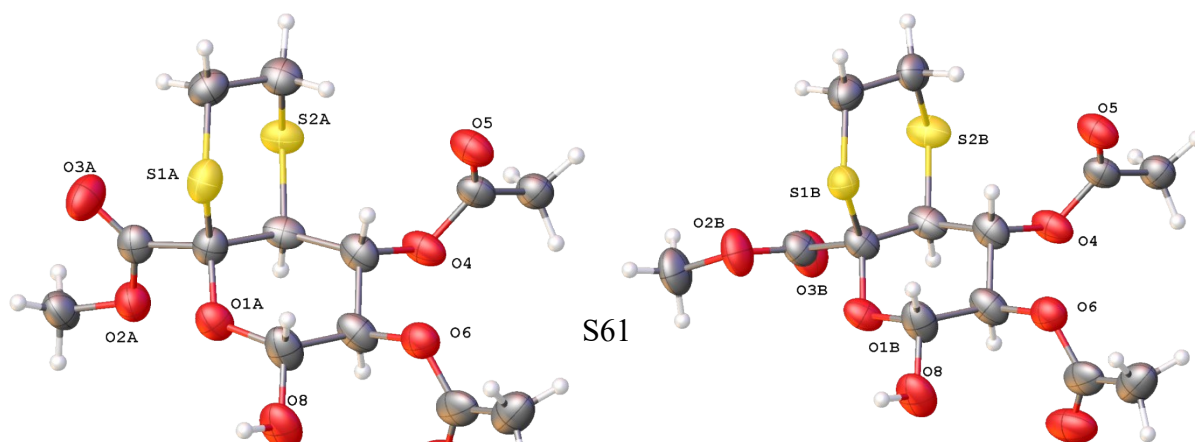

**Fig. S3.** Individual representation of each disordered moiety in **6a'** with (A) majority occupied with sugar ring O1a-C1a-C2a, methyl ester and dithiol ring 61% occupied and (B) minority moiety with sugar ring O1b-C1b-C2b, methyl ester and dithiol ring 39% occupied. Displacement parameters shown at 50% probability. Heteroatoms labelled only.

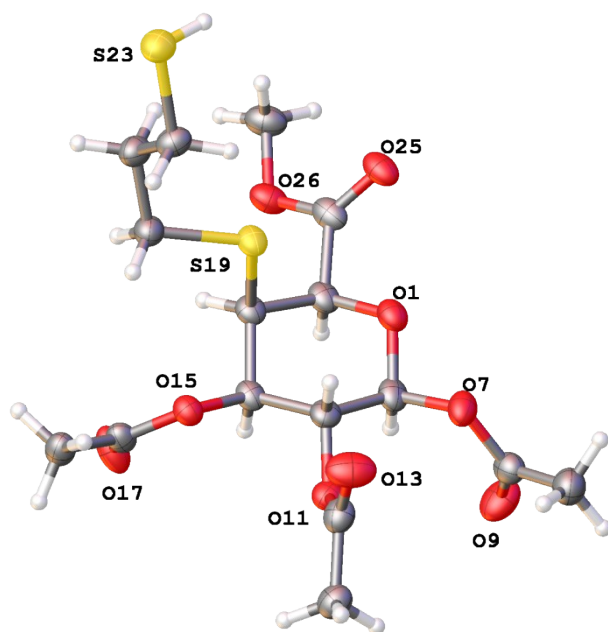

**Fig. S4.** Structure of **6b** with heteroatoms labelled. Atomic displacement shown at 50% probability.

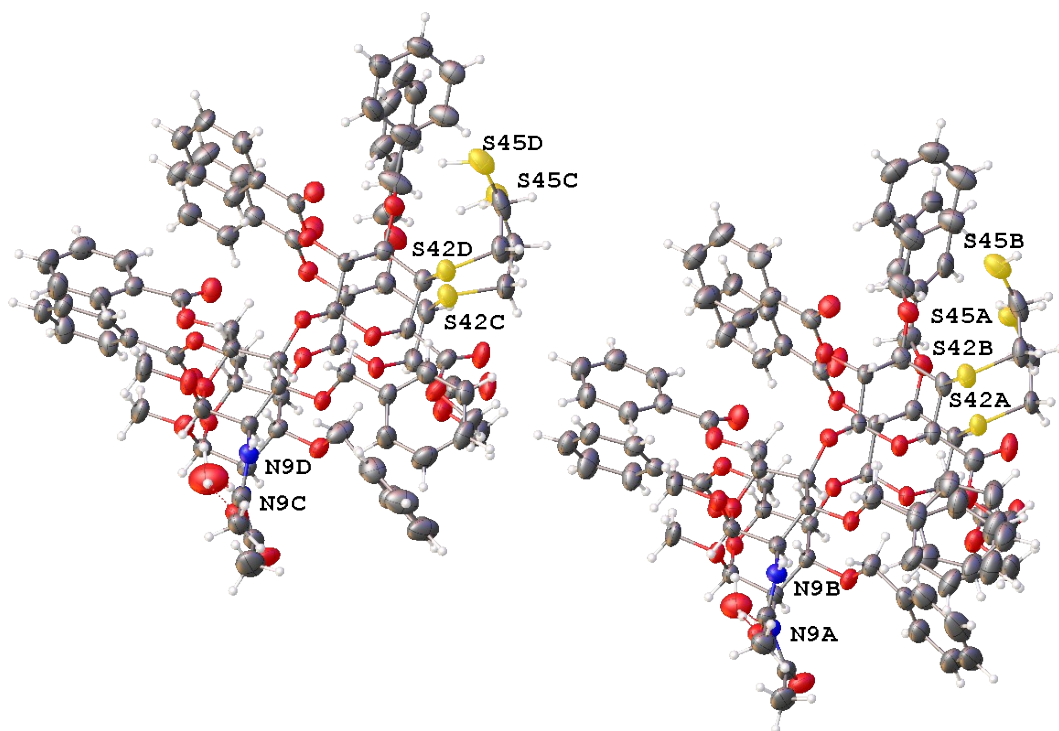

**Fig. S5.** Four independent molecules of **26** in the asymmetric unit with two water molecules. One benzyl ring is disordered over two locations at 50% occupancy. Only selected heteroatoms labelled.

Atomic displacement shown at 50% probability.

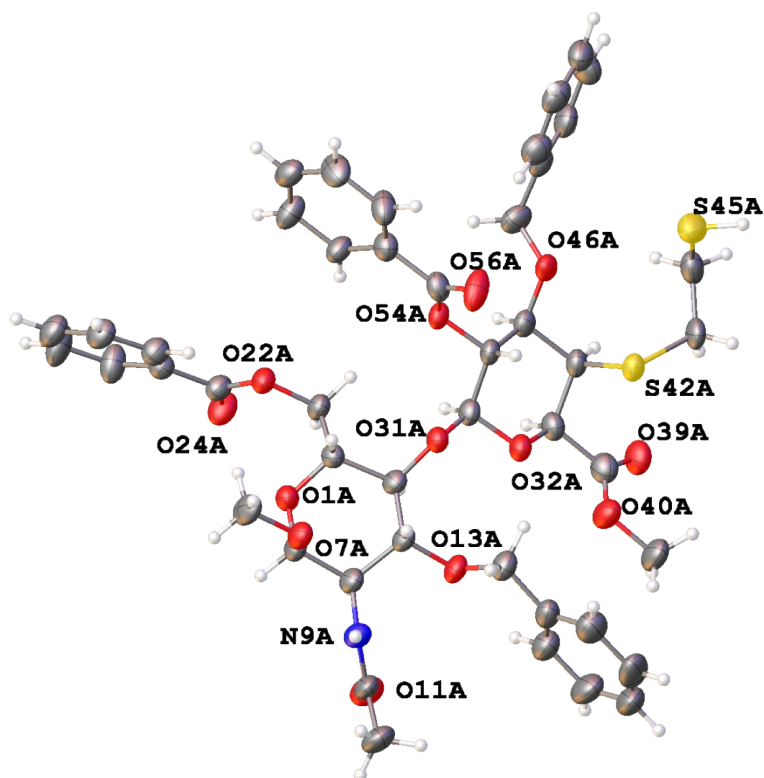

**Fig. S6.** A single molecule of **26** with full heteroatom labelling. Atomic displacement shown at 50% probability.

### ***References for X-ray crystal structure data***

- (1) Bruker, *SAINT*, v8.37A, Bruker AXS Inc., Madison, Wisconsin, USA.
- (2) Krause, L.; Herbst-Irmer, R.; Sheldrick, G. M.; Stalke, D. *J. Appl. Cryst.* **2015**, *48*, 3-10.
- (3) Sheldrick, G. M. *Acta Cryst.* **2015**, *A71*, 3-8.
- (4) Sheldrick, G. M. *Acta Cryst.* **2015**, *C71*, 3-8.
- (5) Dolomanov, O. V.; Bourhis, L. J.; Gildea, R. J.; Howard, J. A. K.; Puschmann, H. *J. Appl. Cryst.* **2009**, *42*, 339-341.
- (6) Groom, C. R.; Bruno, I. J.; Lightfoot, M. P.; Ward, S. C. *Acta Cryst.* **2016**, *B72*, 171-179.
